# Supplementary material for: Rice transcription factors OsNIGT2/3 regulate nitrogen acquisition by repressing OsNRTs and OsAMTs under high-nitrogen conditions
Source: Front Plant Sci. 2025 Jul 2;16:1591808. doi: 10.3389/fpls.2025.1591808 (PMC12263960; doi:10.3389/fpls.2025.1591808)
Supplement: Supplementary file 3 [file Table3.xlsx]

## Sheet: protien-coding
chr.	start	end	length	peak	p	F	Q	RAP-ID	MSU-ID	Best-hit-arabi-name	arabi-symbol	arabi-defline
12	486830	487378	549	487089	225.14	30.1725	220.094	Os12g0108933	None
10	19117377	19117952	576	19117668	178.672	28.6109	173.886	Os10g0501401	None
8	24462125	24462678	554	24462419	198.907	27.5312	194.016	Os08g0495500	LOC_Os08g38700	AT1G55760.1		BTB/POZ domain-containing protein
10	14099866	14100432	567	14100151	123.301	24.2865	118.881	Os10g0408700	LOC_Os10g26850
2	34567367	34568402	1036	34567745	155.422	22.9115	150.764	Os02g0808800	LOC_Os02g56460	AT1G15950.1	ATCCR1,CCR1,IRX4	cinnamoyl coa reductase 1
4	14006755	14007869	1115	14007533	134.408	22.1563	129.896	Os04g0309400	LOC_Os04g24414
11	7806909	7807496	588	7807183	128.492	21.7137	124.028	Os11g0245400	LOC_Os11g14060
11	24203323	24203894	572	24203589	129.895	20.6868	125.42	Os11g0620800	LOC_Os11g40560
7	851576	852143	568	851907	118.48	19.8728	114.111	Os07g0115600	LOC_Os07g02470	AT3G19570.2		Family of unknown function (DUF566)
12	25964146	25964636	491	25964370	121.606	19.7465	117.204	Os12g0613100	LOC_Os12g41890	AT4G21120.1	AAT1,CAT1	amino acid transporter 1
12	454544	455350	807	454993	147.668	19.6612	143.061	Os12g0108350	LOC_Os12g01750	AT3G16720.1	ATL2,TL2	TOXICOS EN LEVADURA 2
1	34564833	34565325	493	34565070	124.646	18.8182	120.213	Os01g0813000	LOC_Os01g59750	AT3G56490.1	HINT1,HIT3	HIS triad family protein 3
6	2897192	2897956	765	2897584	127.69	18.7055	123.231	Os06g0156700	LOC_Os06g06260	AT5G45910.1		GDSL-like Lipase/Acylhydrolase superfamily protein
2	775096	775672	577	775371	118.985	18.6652	114.61	Os02g0114300	None
6	12695139	12695912	774	12695553	114.469	18.5911	110.141	Os06g0325200	LOC_Os06g21950	AT1G76430.1	PHT1;9	phosphate transporter 1;9
4	26216493	26217296	804	26216937	107.024	18.3885	102.779	Os04g0524136	LOC_Os04g44260	AT2G17420.1	ATNTRA,NTR2,NTRA	NADPH-dependent thioredoxin reductase A
10	20387212	20387769	558	20387506	104.238	18.0308	100.025	Os10g0524400	LOC_Os10g38060	AT2G42010.1	PLDBETA,PLDBETA1	phospholipase D beta 1
2	7499892	7500436	545	7500184	101.788	17.778	97.6038	Os02g0232500	LOC_Os02g13850	AT1G53440.1		Leucine-rich repeat transmembrane protein kinase
4	26378153	26379152	1000	26378414	113.887	17.6498	109.566	Os04g0527900	LOC_Os04g44570	AT1G17810.1	BETA-TIP	beta-tonoplast intrinsic protein
6	1813740	1814242	503	1813989	106.965	17.5702	102.721	Os06g0133800	LOC_Os06g04270	AT2G45290.1		Transketolase
12	17632244	17632668	425	17632458	95.2479	17.5378	91.1369	Os12g0480200	LOC_Os12g29580	AT3G52890.2	KIPK	KCBP-interacting protein kinase
10	12116347	12116887	541	12116627	106.758	17.5066	102.517	Os10g0378400	LOC_Os10g23220	AT2G45260.1		Plant protein of unknown function (DUF641)
4	29988338	29989031	694	29988670	100.74	17.4372	96.5677	Os04g0592700	LOC_Os04g50660	AT5G16750.1	TOZ	Transducin family protein / WD-40 repeat family protein
4	20313910	20314423	514	20314138	96.3225	17.3427	92.2005	Os04g0411300	None
10	775596	776148	553	775869	104.54	17.3328	100.323	Os10g0110800	LOC_Os10g02220	AT2G02040.1	ATPTR2,ATPTR2-B,NTR1,PTR2,PTR2-B	peptide transporter 2
3	87657	88288	632	87990	98.5091	16.9857	94.3614	Os03g0100800	LOC_Os03g01120	AT5G62670.1	AHA11,HA11	H(+)-ATPase 11
5	14853147	14853596	450	14853357	118.159	16.7728	113.792	Os05g0319800	LOC_Os05g25550	AT2G07560.1	AHA6,HA6	H(+)-ATPase 6
3	25051814	25052292	479	25052044	116.024	16.6364	111.68	Os03g0646900	LOC_Os03g44500	AT2G27210.1	BSL3	BRI1 suppressor 1 (BSU1)-like 3
2	1958205	1958735	531	1958444	103.598	16.5544	99.3907	Os02g0136966	None
3	3709367	3710412	1046	3709715	102.313	16.4129	98.1212	Os03g0168900	LOC_Os03g07290	AT1G26740.1		Ribosomal L32p protein family
2	1792964	1793495	532	1793221	96.5456	16.3688	92.4212	Os02g0134000	LOC_Os02g04120	AT2G18250.1	ATCOAD,COAD	4-phosphopantetheine adenylyltransferase
5	23437943	23438424	482	23438213	91.7045	16.359	87.6308	Os05g0476400	LOC_Os05g39880	AT2G30370.1	CHAL,EPFL6	allergen-related
9	10879219	10880051	833	10879494	89.2804	15.8352	85.2336	Os09g0346900	LOC_Os09g17770	AT1G15215.2
2	19547583	19548224	642	19547900	80.7228	15.6006	76.7798	Os02g0531200	LOC_Os02g32930	AT3G56160.1		Sodium Bile acid symporter family
1	33606483	33607118	636	33606735	88.7165	15.4118	84.6762	Os01g0793300	LOC_Os01g58100
1	3450811	3451412	602	3451131	118.96	15.3769	114.585	Os01g0167500	LOC_Os01g07310	AT1G06890.1		nodulin MtN21 /EamA-like transporter family protein
8	23263637	23264303	667	23263916	94.3187	15.231	90.2164	Os08g0472400	LOC_Os08g36820	AT5G67020.1
2	514105	514571	467	514340	80.2485	15.1788	76.3116	Os02g0109400	LOC_Os02g01940	AT3G07610.1	IBM1	Transcription factor jumonji (jmjC) domain-containing protein
7	7168586	7169236	651	7169010	78.9896	15.0156	75.0683	Os07g0228000	LOC_Os07g12540
1	37563886	37565001	1116	37564209	77.9119	14.9112	74.005	Os01g0867600	LOC_Os01g64750	AT1G43620.3	TT15,UGT80B1	UDP-Glycosyltransferase superfamily protein
1	9676457	9676901	445	9676663	84.5202	14.8288	80.5321	Os01g0276200	LOC_Os01g16910	AT3G20000.1	TOM40	translocase of the outer mitochondrial membrane 40
12	21245725	21246478	754	21246052	72.8415	14.738	69.0062	Os12g0534400	LOC_Os12g34900
5	24989212	24989697	486	24989485	85.716	14.7292	81.7141	Os05g0505900	LOC_Os05g43030	AT1G69970.2	CLE26	CLAVATA3/ESR-RELATED 26
10	10357339	10357909	571	10357644	87.1882	14.715	83.1677	Os10g0345900	LOC_Os10g20550
1	27931463	27931981	519	27931752	80.2012	14.6659	76.2644	Os01g0678800	LOC_Os01g48710	AT5G52750.1		Heavy metal transport/detoxification superfamily protein
3	7145070	7146147	1078	7145451	86.8959	14.4077	82.8793	Os03g0235400	None
9	18887984	18888455	472	18888238	70.2804	14.3691	66.4809	Os09g0490200	LOC_Os09g31400	AT1G73730.1	AtEIL3,ATSLIM,EIL3,SLIM1	ETHYLENE-INSENSITIVE3-like 3
1	27237004	27237552	549	27237267	74.7293	14.356	70.8667	Os01g0666101	None
4	30061894	30062521	628	30062260	83.6456	14.3345	79.6682	Os04g0594800	LOC_Os04g50820	AT5G64410.1	ATOPT4,OPT4	oligopeptide transporter 4
10	5441541	5442088	548	5441823	69.1026	14.2178	65.3176	Os10g0179000	None
8	21444076	21444649	574	21444364	73.4866	14.1917	69.6424	Os08g0440800	LOC_Os08g34210	AT2G24270.4	ALDH11A3	aldehyde dehydrogenase 11A3
6	8198395	8199036	642	8198712	86.6794	14.1314	82.6649	Os06g0257200	LOC_Os06g14550	AT3G49100.1		Signal recognition particle, SRP9/SRP14 subunit
7	15981716	15982273	558	15982026	75.5183	14.1275	71.6451	Os07g0458500	LOC_Os07g27430	AT2G32380.1		Transmembrane protein 97, predicted
8	28003912	28004357	446	28004130	88.9458	13.9375	84.9037	Os08g0559400	LOC_Os08g44520	AT2G36130.1		Cyclophilin-like peptidyl-prolyl cis-trans isomerase family protein
4	20248496	20248962	467	20248721	78.6378	13.7246	74.7211	Os04g0409600	LOC_Os04g33480	AT3G44680.1	HDA09,HDA9	histone deacetylase 9
6	23242177	23242604	428	23242382	74.2246	13.7168	70.3694	Os06g0591551	None
12	9311987	9312515	529	9312282	73.4875	13.7148	69.6431	Os12g0263800	LOC_Os12g16260
1	37563886	37565001	1116	37564722	67.877	13.5467	64.1095	Os01g0867600	LOC_Os01g64750	AT1G43620.3	TT15,UGT80B1	UDP-Glycosyltransferase superfamily protein
3	7712479	7713096	618	7712778	98.3662	13.536	94.2211	Os03g0246150	LOC_Os03g14220	AT5G62900.1
5	4816453	4817171	719	4816812	93.9377	13.5208	89.8406	Os05g0180300	LOC_Os05g08770	AT3G24480.1		Leucine-rich repeat (LRR) family protein
2	33927744	33928203	460	33927993	67.7973	13.52	64.031	Os02g0797200	None
1	1159438	1160013	576	1159742	71.8124	13.4153	67.9908	Os01g0120400	LOC_Os01g03030	AT3G16565.2		alanine-tRNA ligases;nucleic acid binding;ligases, forming aminoacyl-tRNA and related compounds;nucleotide binding;ATP binding
7	7748141	7748627	487	7748388	87.1419	13.2651	83.1222	Os07g0239400	LOC_Os07g13530	AT5G59840.1		Ras-related small GTP-binding family protein
12	3317092	3317710	619	3317487	69.1389	13.2517	65.3525	Os12g0165000	LOC_Os12g06810	AT3G05090.1	LRS1	Transducin/WD40 repeat-like superfamily protein
1	3454325	3454828	504	3454585	66.9332	13.2333	63.1782	Os01g0167600	LOC_Os01g07320
8	23050417	23051127	711	23050694	76.0423	13.1727	72.1617	Os08g0468801	None
2	5569826	5570325	500	5570057	70.3037	13.1674	66.5038	Os02g0199300	LOC_Os02g10590	AT4G26555.1		FKBP-like peptidyl-prolyl cis-trans isomerase family protein
6	19423121	19423663	543	19423339	65.8891	13.1244	62.1478	Os06g0524500	LOC_Os06g33340	AT1G28540.1
10	416674	417386	713	416895	59.7734	12.9739	56.1227	Os10g0105400	LOC_Os10g01610	AT3G58050.1
6	5368804	5369370	567	5369091	65.3556	12.949	61.6242	Os06g0206200	LOC_Os06g10440	AT2G41945.1
2	10155227	10155629	403	10155414	59.4653	12.8648	55.8175	Os02g0276400	LOC_Os02g17640	AT3G16190.1		Isochorismatase family protein
1	42645421	42645960	540	42645654	79.1812	12.8554	75.2563	Os01g0967100	LOC_Os01g73620	AT2G19390.1
5	25175785	25176240	456	25176030	57.9933	12.8411	54.368	Os05g0508700	LOC_Os05g43280	AT1G04300.1		TRAF-like superfamily protein
3	17547311	17547855	545	17547580	82.4525	12.7871	78.4895	Os03g0421300	LOC_Os03g30780
2	26761630	26762365	736	26762141	60.5585	12.7567	56.8946	Os02g0661050	None
3	32707890	32708373	484	32708106	68.8149	12.7075	65.0341	Os03g0787300	LOC_Os03g57340	AT5G22060.1	ATJ2,J2	DNAJ homologue 2
1	9086810	9087284	475	9087084	72.9529	12.6878	69.1168	Os01g0266100	LOC_Os01g16120	AT2G01150.1	RHA2B	RING-H2 finger protein 2B
1	6002018	6003323	1306	6002384	65.8675	12.6616	62.1263	Os01g0210200	LOC_Os01g11200	AT5G67300.1	ATMYB44,ATMYBR1,MYB44,MYBR1	myb domain protein r1
3	351682	352261	580	352053	71.3333	12.6239	67.5183	Os03g0105800	LOC_Os03g01550	AT4G11450.1		Protein of unknown function (DUF3527)
1	40384725	40385281	557	40385002	56.5727	12.5813	52.9718	Os01g0923300	LOC_Os01g69900	AT5G50530.1		CBS / octicosapeptide/Phox/Bemp1 (PB1) domains-containing protein
4	33160131	33161360	1230	33160380	61.364	12.5571	57.6869	Os04g0650700	LOC_Os04g55710	AT3G16150.1		N-terminal nucleophile aminohydrolases (Ntn hydrolases) superfamily protein
2	14353838	14354277	440	14354078	58.4867	12.5226	54.8553	Os02g0445600	LOC_Os02g24740	AT4G34760.1		SAUR-like auxin-responsive protein family
2	30785981	30786480	500	30786240	57.7491	12.5069	54.1288	Os02g0737950	LOC_Os02g50410
1	14626826	14627267	442	14627031	65.3562	12.501	61.6247	Os01g0360200	LOC_Os01g25820	AT5G47910.1	ATRBOHD,RBOHD	respiratory burst oxidase homologue D
1	5495952	5496576	625	5496191	63.9519	12.4957	60.2392	Os01g0201000	LOC_Os01g10430	AT1G53050.1		Protein kinase superfamily protein
3	7087258	7087690	433	7087468	68.0946	12.4894	64.3238	Os03g0233800	LOC_Os03g13130	AT2G23700.1		Protein of unknown function, DUF547
4	29215791	29216226	436	29215989	59.7416	12.4781	56.0913	Os04g0579200	LOC_Os04g49000	AT3G61460.1	BRH1	brassinosteroid-responsive RING-H2
9	22808454	22809137	684	22808814	75.6904	12.4773	71.8141	Os09g0571200	LOC_Os09g39770	AT5G23950.1		Calcium-dependent lipid-binding (CaLB domain) family protein
4	21430458	21430907	450	21430668	73.1603	12.3529	69.3212	Os04g0432200	LOC_Os04g35260	AT1G58060.1		RNA helicase family protein
5	18369717	18370375	659	18370054	64.8566	12.3455	61.1309	Os05g0380250	None
7	9961434	9961957	524	9961691	59.0185	12.2352	55.3775	Os07g0270800	LOC_Os07g16930	AT5G45480.1		Protein of unknown function (DUF594)
8	26420560	26421020	461	26420767	76.6819	12.1896	72.7924	Os08g0530400	LOC_Os08g41830	AT3G01910.1	AT-SO,AtSO,SOX	sulfite oxidase
9	19923119	19923526	408	19923315	56.1354	12.1842	52.5399	Os09g0512200	LOC_Os09g33740	AT3G24800.1	PRT1	proteolysis 1
12	10258455	10258884	430	10258688	58.8051	12.1641	55.1693	Os12g0277000	LOC_Os12g17880	AT1G20780.1	ATPUB44,PUB44,SAUL1	senescence-associated E3 ubiquitin ligase 1
12	16390071	16390543	473	16390290	45.6468	12.0653	42.2209	Os12g0464300	LOC_Os12g27810
10	1714214	1714743	530	1714522	58.383	12.0245	54.7526	Os10g0127000	LOC_Os10g03780	AT5G27750.1		F-box/FBD-like domains containing protein
4	20110909	20111628	720	20111378	67.7948	11.9984	64.0287	Os04g0405300	LOC_Os04g33240	AT1G52340.1	ABA2,ATABA2,ATSDR1,GIN1,ISI4,SDR1,SIS4,SRE1	NAD(P)-binding Rossmann-fold superfamily protein
12	15269147	15269607	461	15269334	56.7578	11.9339	53.1518	Os12g0447932	None
5	1140191	1140822	632	1140490	56.7578	11.9339	53.1518	Os05g0121400	LOC_Os05g03020	AT1G72050.2	TFIIIA	transcription factor IIIA
6	1518527	1519050	524	1518767	68.1067	11.8946	64.3355	Os06g0128600	LOC_Os06g03800	AT5G07270.1	XBAT33	XB3 ortholog 3 in Arabidopsis thaliana
1	38717340	38717817	478	38717588	57.8983	11.8656	54.2746	Os01g0890300	LOC_Os01g66650
3	33855907	33856450	544	33856168	66.6532	11.8651	62.9017	Os03g0809400	LOC_Os03g59480	AT1G75150.1
3	31962943	31963390	448	31963154	63.9402	11.8601	60.2281	Os03g0771500	LOC_Os03g56110	AT4G08150.1	BP,BP1,KNAT1	KNOTTED-like from Arabidopsis thaliana
7	28184291	28184710	420	28184506	55.0786	11.8213	51.5002	Os07g0667350	None
4	28378180	28378600	421	28378389	76.5824	11.8165	72.6958	Os04g0566000	LOC_Os04g47820	AT2G25720.1
1	40730776	40731339	564	40731057	58.9038	11.7572	55.2643	Os01g0928100	LOC_Os01g70320	AT3G48860.2
5	23083843	23084333	491	23084114	58.9038	11.7572	55.2643	Os05g0470000	LOC_Os05g39350	AT3G55990.1	ESK1,TBL29	Plant protein of unknown function (DUF828)
5	2792759	2793306	548	2793033	50.8501	11.7456	47.3403	Os05g0148800	LOC_Os05g05610
7	23544304	23544868	565	23544585	62.2082	11.7437	58.5189	Os07g0581333	None
4	30384913	30385409	497	30385204	54.6671	11.6822	51.0943	Os04g0602100	LOC_Os04g51300	AT4G09010.1	APX4,TL29	ascorbate peroxidase 4
2	27995982	27996584	603	27996222	64.3845	11.5984	60.6663	Os02g0684500	LOC_Os02g45940	AT5G59970.1		Histone superfamily protein
10	2191231	2191689	459	2191439	55.0685	11.5942	51.4903	Os10g0135250	None
5	23440244	23440655	412	23440441	62.144	11.5261	58.4565	Os05g0476466	LOC_Os05g39900	AT4G30960.1	ATCIPK6,CIPK6,SIP3,SNRK3.14	SOS3-interacting protein 3
5	2525259	2525808	550	2525532	55.4077	11.4883	51.8249	Os05g0143800	LOC_Os05g05180	AT4G37390.1	AUR3,BRU6,GH3-2,GH3.2,YDK1	Auxin-responsive GH3 family protein
2	8542562	8543329	768	8542964	54.8828	11.3183	51.3071	Os02g0251900	LOC_Os02g15290	AT1G78410.1		VQ motif-containing protein
3	28259172	28259614	443	28259430	52.7949	11.2766	49.2531	Os03g0703200	LOC_Os03g49620
7	6034230	6035273	1044	6035078	49.1623	11.146	45.6784	Os07g0211101	LOC_Os07g11000	AT3G23590.1	MED33A,RFR1	REF4-related 1
6	28630427	28630906	480	28630660	48.9672	11.0782	45.4865	Os06g0686600	LOC_Os06g47220	AT4G09890.1		Protein of unknown function (DUF3511)
3	10436404	10437501	1098	10437318	59.2703	11.0681	55.6258	Os03g0297800	LOC_Os03g18630	AT3G51740.1	IMK2	inflorescence meristem receptor-like kinase 2
12	11275029	11275496	468	11275256	53.252	11.0036	49.7035	Os12g0291400	LOC_Os12g19381	AT1G67090.1	RBCS1A	ribulose bisphosphate carboxylase small chain 1A
6	17028741	17029189	449	17028947	52.4474	10.9516	48.9105	Os06g0492300	LOC_Os06g29679
2	29528949	29529540	592	29529226	46.0085	10.9396	42.5754	Os02g0712800	LOC_Os02g48220
3	34755056	34755466	411	34755262	46.6193	10.9295	43.1776	Os03g0827500	LOC_Os03g61200	AT5G15330.1	ATSPX4,SPX4	SPX domain gene 4
8	378475	378907	433	378660	46.6023	10.9234	43.1607	Os08g0107700	LOC_Os08g01640	AT1G63130.1		Tetratricopeptide repeat (TPR)-like superfamily protein
3	24429969	24430470	502	24430233	53.6127	10.9146	50.0573	Os03g0637900	LOC_Os03g43684	AT4G14760.1		kinase interacting (KIP1-like) family protein
3	26093320	26093817	498	26093592	61.2421	10.8966	57.5662	Os03g0664300	LOC_Os03g46140	AT1G15015.1		F-box family protein
5	28752321	28752903	583	28752569	52.139	10.8528	48.6087	Os05g0577200	LOC_Os05g50170	AT5G15860.1	ATPCME,PCME	prenylcysteine methylesterase
4	19867378	19867749	372	19867555	45.5607	10.7787	42.1367	Os04g0401400	LOC_Os04g32890
1	29478725	29479128	404	29478929	54.3656	10.7533	50.7991	Os01g0709400	LOC_Os01g51280	AT1G72880.2		Survival protein SurE-like phosphatase/nucleotidase
4	35099203	35099574	372	35099394	54.3656	10.7533	50.7991	Os04g0686650	LOC_Os04g59000	AT2G17700.1		ACT-like protein tyrosine kinase family protein
5	1220621	1221157	537	1220882	54.3656	10.7533	50.7991	Os05g0122400	LOC_Os05g03100	AT5G02880.1	UPL4	ubiquitin-protein ligase 4
2	33467575	33468014	440	33467809	59.8731	10.6946	57.1255	Os02g0787600	LOC_Os02g54640	AT2G29120.1	ATGLR2.7,GLR2.7	glutamate receptor 2.7
6	26098931	26099379	449	26099123	49.5531	10.6322	46.0639	Os06g0641600	LOC_Os06g43420	AT5G57260.1	CYP71B10	cytochrome P450, family 71, subfamily B, polypeptide 10
2	6806095	6806546	452	6806297	47.644	10.6253	44.1865	Os02g0221900	LOC_Os02g12890	AT2G26170.1	CYP711A1,MAX1	cytochrome P450, family 711, subfamily A, polypeptide 1
1	6344651	6345148	498	6344895	43.5815	10.5194	40.1907	Os01g0216150	None
6	28238926	28239376	451	28239141	44.7515	10.4919	41.3408	Os06g0678800	LOC_Os06g46500	AT1G76160.1	sks5	SKU5 similar 5
10	11674550	11674940	391	11674753	46.5409	10.4643	43.1011	Os10g0370500	LOC_Os10g22520
8	3727750	3728161	412	3727952	57.7665	10.4608	54.1441	Os08g0163100	LOC_Os08g06600	AT1G61000.1
2	8557614	8558868	1255	8558614	48.8363	10.4006	45.3588	Os02g0252100	LOC_Os02g15310	AT3G13570.1	SCL30A	SC35-like splicing factor 30A
7	2677471	2677925	455	2677664	48.7153	10.3619	45.241	Os07g0151100	LOC_Os07g05630	AT5G14070.1	ROXY2	Thioredoxin superfamily protein
2	12720160	12720662	503	12720401	56.6879	10.3347	53.0834	Os02g0319100	LOC_Os02g21430	AT1G29400.2	AML5,ML5	MEI2-like protein 5
8	24516607	24517115	509	24516865	41.7975	10.3219	38.4383	Os08g0496500	LOC_Os08g38780	AT1G56170.2	ATHAP5B,HAP5B,NF-YC2	nuclear factor Y, subunit C2
6	20815775	20816210	436	20815964	47.6287	10.2117	44.1712	Os06g0549633	LOC_Os06g35660	AT5G44400.1		FAD-binding Berberine family protein
4	16560290	16560793	504	16560542	48.8114	10.1973	45.3354	Os04g0348000	LOC_Os04g28050
2	35785685	35786124	440	35785895	48.1335	10.1771	44.6671	Os02g0832150	LOC_Os02g58540	AT1G20823.1		RING/U-box superfamily protein
5	7150197	7150845	649	7150500	48.0187	10.1409	44.554	Os05g0215183	LOC_Os05g12440
1	41387591	41388443	853	41388016	65.7829	10.1365	62.0437	Os01g0941800	LOC_Os01g71420	AT3G10150.1	ATPAP16,PAP16	purple acid phosphatase 16
4	33004703	33005187	485	33004954	52.2739	10.132	48.7397	Os04g0648700	LOC_Os04g55500	AT2G21800.1	ATEME1A,EME1A	essential meiotic endonuclease 1A
5	10864855	10865208	354	10865041	41.8764	10.1293	38.5152	Os05g0270000	LOC_Os05g18750	AT4G23620.1		Ribosomal protein L25/Gln-tRNA synthetase, anti-codon-binding domain
5	21314306	21314783	478	21314546	45.9845	10.0761	42.552	Os05g0435400	LOC_Os05g35970	AT1G44414.1
1	1266073	1266528	456	1266314	42.8237	10.0352	39.4458	Os01g0122534	None
2	517856	518487	632	518128	45.5897	9.94843	42.1645	Os02g0109501	LOC_Os02g01940	AT3G07610.1	IBM1	Transcription factor jumonji (jmjC) domain-containing protein
4	26614538	26614994	457	26614733	41.8004	9.89038	38.4411	Os04g0532100	LOC_Os04g44980	AT1G01800.1		NAD(P)-binding Rossmann-fold superfamily protein
6	8168115	8168505	391	8168294	38.7526	9.87302	35.4471	Os06g0256600	LOC_Os06g14520
6	28482631	28483110	480	28482865	50.143	9.86533	46.6429	Os06g0683400	LOC_Os06g46950	AT4G27280.1		Calcium-binding EF-hand family protein
9	19396964	19397700	737	19397478	46.9536	9.8097	43.5061	Os09g0501200	LOC_Os09g32500	AT4G18100.1		Ribosomal protein L32e
3	7285685	7286171	487	7285923	43.2723	9.78056	39.8873	Os03g0237600	LOC_Os03g13460	AT1G14690.2	MAP65-7	microtubule-associated protein 65-7
4	1876786	1877175	390	1876981	51.0444	9.77937	47.5316	Os04g0129900	LOC_Os04g04060	AT1G60500.1	DRP4C	Dynamin related protein 4C
1	28941862	28942329	468	28942114	43.7841	9.75272	40.3895	Os01g0699500	LOC_Os01g50410	AT4G26890.1	MAPKKK16	mitogen-activated protein kinase kinase kinase 16
1	20752154	20752594	441	20752384	48.9592	9.69504	45.4787	Os01g0552500	None
4	29550867	29551602	736	29551236	48.9592	9.69504	45.4787	Os04g0585050	None
8	22220151	22220660	510	22220423	40.6146	9.68692	37.2759	Os08g0453716	None
10	15359760	15360124	365	15359933	37.558	9.65162	34.2738	Os10g0431000	LOC_Os10g29560	AT5G47430.1		DWNN domain, a CCHC-type zinc finger
11	24071729	24072154	426	24071946	43.4577	9.64696	40.0687	Os11g0618300	LOC_Os11g40370	AT5G61560.1		U-box domain-containing protein kinase family protein
2	1984389	1984881	493	1984588	43.4577	9.64696	40.0687	Os02g0137450	LOC_Os02g04490	AT1G16710.1	HAC12	histone acetyltransferase of the CBP family 12
4	4435567	4436059	493	4435820	43.4577	9.64696	40.0687	Os04g0165300	LOC_Os04g08310	AT2G45980.1
8	27516450	27516962	513	27516699	58.26	9.63764	54.6313	Os08g0548600	None
3	11530441	11531309	869	11530641	45.7444	9.62135	42.3169	Os03g0319400	LOC_Os03g20380	AT2G26980.4	CIPK3,SnRK3.17	CBL-interacting protein kinase 3
1	19541259	19541818	560	19541546	50.3293	9.57852	46.8268	Os01g0536950	LOC_Os01g35300	AT1G50180.1		NB-ARC domain-containing disease resistance protein
3	25509768	25510429	662	25510138	43.238	9.57627	39.8539	Os03g0654400	LOC_Os03g45170	AT1G58030.1	CAT2	cationic amino acid transporter 2
6	30950866	30951325	460	30951109	40.2282	9.55415	36.8956	Os06g0727300	LOC_Os06g51160	AT4G38270.1	GAUT3	galacturonosyltransferase 3
7	16194857	16195350	494	16195124	51.5897	9.44093	48.0673	Os07g0461500	LOC_Os07g27750	AT2G40060.1		Clathrin light chain protein
5	23911299	23911790	492	23911559	51.5549	9.43165	48.0335	Os05g0486200	LOC_Os05g40780	AT1G77350.2
4	5606573	5607238	666	5607046	42.1858	9.42664	38.8197	Os04g0182600	LOC_Os04g10380	AT5G47020.1
9	12626220	12626703	484	12626441	40.3124	9.38529	36.9782	Os09g0376600	LOC_Os09g20970	AT4G23740.1		Leucine-rich repeat protein kinase family protein
7	1499073	1499581	509	1499358	48.4317	9.37613	44.9613	Os07g0128800	LOC_Os07g03690	AT2G14610.1	ATPR1,PR 1,PR1	pathogenesis-related gene 1
5	27387871	27388296	426	27388042	48.9543	9.35944	45.4741	Os05g0551100	LOC_Os05g47790
12	1976103	1976784	682	1976472	39.0577	9.35361	35.7471	Os12g0140700	LOC_Os12g04660	AT3G19950.1		RING/U-box superfamily protein
10	16503123	16503494	372	16503303	43.6506	9.33837	40.2582	Os10g0452500	LOC_Os10g31500
4	22266699	22267211	513	22266946	39.0101	9.33736	35.701	Os04g0446750	None
11	22886141	22886604	464	22886382	41.7133	9.2756	38.3548	Os11g0598900	LOC_Os11g38620	AT3G47910.2		Ubiquitin carboxyl-terminal hydrolase-related protein
2	27558453	27558921	469	27558680	41.6614	9.25911	38.3042	Os02g0676000	LOC_Os02g45344	AT1G63050.1		MBOAT (membrane bound O-acyl transferase) family protein
4	35097935	35098316	382	35098127	39.2132	9.21144	35.8997	Os04g0686650	LOC_Os04g59000	AT2G17700.1		ACT-like protein tyrosine kinase family protein
12	7644934	7645269	336	7645080	40.3103	9.19476	36.9762	Os12g0238100	LOC_Os12g13590	AT5G12370.1	SEC10	exocyst complex component sec10
7	6034230	6035273	1044	6034446	36.2983	9.19457	33.0385	Os07g0211101	LOC_Os07g11000	AT3G23590.1	MED33A,RFR1	REF4-related 1
4	14310443	14310854	412	14310660	29.9452	9.16068	26.8134	Os04g0314201	None
12	1947819	1948233	415	1948028	37.2854	9.13993	34.006	Os12g0140266	LOC_Os12g04595	AT1G03280.1		Transcription factor TFIIE, alpha subunit
11	28223774	28224296	523	28224002	46.3747	9.12273	42.9375	Os11g0691800	LOC_Os11g46960	AT3G47570.1		Leucine-rich repeat protein kinase family protein
2	6056502	6056917	416	6056683	39.2751	9.04402	35.9596	Os02g0208100	LOC_Os02g11740	AT1G80300.1	ATNTT1,NTT1	nucleotide transporter 1
3	5228109	5228733	625	5228334	39.7968	9.02936	36.4727	Os03g0199500	LOC_Os03g10260	AT4G33800.1
1	42817550	42817985	436	42817747	42.6233	9.0263	39.249	Os01g0970500	None
3	26064603	26065113	511	26064840	36.8721	8.99787	33.6016	Os03g0663700	LOC_Os03g46090	AT2G32010.1	CVL1	CVP2 like 1
1	38113015	38113502	488	38113244	35.7233	8.99094	32.4744	Os01g0878300	LOC_Os01g65650	AT1G72180.1		Leucine-rich receptor-like protein kinase family protein
3	3853828	3854217	390	3854031	47.4998	8.96291	44.0439	Os03g0171900	LOC_Os03g07570	AT4G39660.1	AGT2	alanine:glyoxylate aminotransferase 2
11	6592526	6593546	1021	6592765	45.1856	8.94836	41.7679	Os11g0226100	LOC_Os11g11880
6	26274157	26274592	436	26274354	42.872	8.93212	39.4929	Os06g0644200	LOC_Os06g43660	AT1G15690.1	ATAVP3,AtVHP1;1,AVP-3,AVP1	Inorganic H pyrophosphatase family protein
6	21384082	21384495	414	21384236	42.2287	8.90844	38.8617	Os06g0559600	LOC_Os06g36410
3	25152008	25152333	326	25152180	36.467	8.86015	33.2037	Os03g0649000	LOC_Os03g44670	AT3G11760.1
1	15190072	15190576	505	15190279	36.9929	8.84908	33.719	Os01g0369900	LOC_Os01g27230	AT1G76690.1	ATOPR2,OPR2	12-oxophytodienoate reductase 2
4	5789721	5790140	420	5789966	36.9929	8.84908	33.719	Os04g0185100	LOC_Os04g10650	AT2G31270.1	ATCDT1A,CDT1,CDT1A	homolog of yeast CDT1 A
6	5676543	5677013	471	5676738	37.4203	8.80595	34.1394	Os06g0211200	LOC_Os06g10880	AT1G45249.1	ABF2,AREB1,ATAREB1	abscisic acid responsive elements-binding factor 2
1	12920577	12920987	411	12920769	39.542	8.77241	36.2227	Os01g0332800	LOC_Os01g22980	AT3G17180.1	scpl33	serine carboxypeptidase-like 33
6	10920178	10920735	558	10920467	39.542	8.77241	36.2227	Os06g0295500	LOC_Os06g19160
9	18096042	18096552	511	18096282	47.8077	8.74879	44.3466	Os09g0473600	None
8	5571679	5572272	594	5571940	37.2262	8.74256	33.9481	Os08g0195650	None
1	4904832	4905286	455	4905013	36.07	8.72659	32.8139	Os01g0191700	LOC_Os01g09570	AT4G26270.1	PFK3	phosphofructokinase 3
1	37281087	37281720	634	37281354	31.0845	8.72089	27.9294	Os01g0861000	LOC_Os01g64190	AT5G09270.2
2	34515256	34515724	469	34515462	34.9111	8.70853	31.6776	Os02g0808000	None
1	27858685	27859303	619	27858932	40.8509	8.66549	37.5076	Os01g0677500	LOC_Os01g48580	AT3G15355.1	PFU1,UBC25	ubiquitin-conjugating enzyme 25
1	35580650	35581082	433	35580858	35.2971	8.65228	32.0566	Os01g0831200	LOC_Os01g61500	AT3G51780.1	ATBAG4,BAG4	BCL-2-associated athanogene 4
5	27749572	27749991	420	27749798	36.3549	8.63827	33.0933	Os05g0557700	LOC_Os05g48390	AT2G33770.1	ATUBC24,PHO2,UBC24	phosphate 2
2	24325322	24325747	426	24325557	33.5655	8.62322	30.3588	Os02g0615500	LOC_Os02g40200	AT3G47570.1		Leucine-rich repeat protein kinase family protein
3	4073080	4073554	475	4073285	42.1714	8.57026	38.806	Os03g0176700	LOC_Os03g07960	AT2G26340.1
2	1697291	1697698	408	1697465	32.3127	8.5664	29.1306	Os02g0132500	LOC_Os02g03960	AT4G34590.1	ATB2,AtbZIP11,BZIP11,GBF6	G-box binding factor 6
3	33520317	33520822	506	33520605	34.4287	8.54372	31.2041	Os03g0803200	LOC_Os03g58870	AT1G69970.2	CLE26	CLAVATA3/ESR-RELATED 26
4	26721793	26722189	397	26721996	36.5977	8.53944	33.331	Os04g0534801	None
2	30780856	30781279	424	30781062	36.0195	8.52886	32.764	Os02g0737300	LOC_Os02g50400
3	31501753	31502231	479	31502024	36.5503	8.52426	33.2842	Os03g0761900	LOC_Os03g55380	AT4G33910.1		2-oxoglutarate (2OG) and Fe(II)-dependent oxygenase superfamily protein
6	30416671	30417041	371	30416856	37.0814	8.51982	33.8062	Os06g0716100	LOC_Os06g50230
12	23147841	23148275	435	23148079	31.5753	8.49601	28.4096	Os12g0564400	LOC_Os12g37710	AT4G15510.1		Photosystem II reaction center PsbP family protein
7	22388559	22389003	445	22388767	32.0687	8.47858	28.8927	Os07g0560700	None
5	1868281	1868716	436	1868506	41.1792	8.44422	37.8297	Os05g0132100	LOC_Os05g04170	AT2G47240.2	CER8,LACS1	AMP-dependent synthetase and ligase family protein
7	23277431	23277787	357	23277588	36.8005	8.43149	33.5308	Os07g0575500	LOC_Os07g38790	AT1G05590.1	ATHEX3,HEXO2	beta-hexosaminidase 2
9	12815565	12815971	407	12815766	34.0946	8.43081	30.8769	Os09g0380000	LOC_Os09g21230	AT5G23050.1	AAE17	acyl-activating enzyme 17
11	6425092	6425616	525	6425343	38.8563	8.39886	35.5485	Os11g0222900	LOC_Os11g11550	AT3G07040.1	RPM1,RPS3	NB-ARC domain-containing disease resistance protein
5	26195654	26196222	569	26195963	38.8563	8.39886	35.5485	Os05g0526900	LOC_Os05g45090	AT3G16520.3	UGT88A1	UDP-glucosyl transferase 88A1
7	23496186	23496722	537	23496384	38.8563	8.39886	35.5485	Os07g0580700	LOC_Os07g39240	AT1G52780.1		Protein of unknown function (DUF2921)
1	38310105	38310605	501	38310378	32.3113	8.37344	29.1294	Os01g0882900	None
2	27496326	27496856	531	27496547	37.1483	8.37186	33.8721	Os02g0674800	LOC_Os02g45250	AT4G00730.1	AHDP,ANL2	Homeobox-leucine zipper family protein / lipid-binding START domain-containing protein
2	24682081	24682537	457	24682302	38.7484	8.36695	35.4431	Os02g0620500	LOC_Os02g40710	AT4G13510.1	AMT1;1,ATAMT1,ATAMT1;1	ammonium transporter 1;1
1	14306518	14306885	368	14306692	39.2821	8.36542	35.9663	Os01g0355600	LOC_Os01g25330	AT3G59770.1	SAC9	sacI homology domain-containing protein / WW domain-containing protein
3	14232296	14232728	433	14232507	34.3453	8.33517	31.1234	Os03g0364700	LOC_Os03g24950	AT5G05140.1		Transcription elongation factor (TFIIS) family protein
1	30653928	30654308	381	30654104	31.1062	8.32608	27.9503	Os01g0734800	LOC_Os01g53350	AT3G16520.3	UGT88A1	UDP-glucosyl transferase 88A1
10	20005424	20005921	498	20005660	32.6079	8.29073	29.4204	Os10g0517500	LOC_Os10g37340	AT1G64660.1	ATMGL,MGL	methionine gamma-lyase
3	6565859	6566351	493	6566069	32.6079	8.29073	29.4204	Os03g0225300	LOC_Os03g12430	AT5G47360.1		Tetratricopeptide repeat (TPR)-like superfamily protein
4	33932098	33932605	508	33932357	37.8692	8.26555	34.5793	Os04g0664600	LOC_Os04g56910	AT5G48930.1	HCT	hydroxycinnamoyl-CoA shikimate/quinate hydroxycinnamoyl transferase
1	40074920	40075850	931	40075603	28.2398	8.24895	25.1466	Os01g0918500	LOC_Os01g68970	AT5G64930.1	CPR5,HYS1	CPR5 protein, putative
10	15453425	15454002	578	15453638	34.5568	8.23032	31.33	Os10g0433700	LOC_Os10g29720
9	8535577	8535990	414	8535784	31.884	8.22473	28.7111	Os09g0313600	LOC_Os09g14450	AT3G14460.1		LRR and NB-ARC domains-containing disease resistance protein
4	26252021	26252519	499	26252182	34.466	8.20117	31.241	Os04g0524700	None
1	19057197	19057602	406	19057388	31.2631	8.19299	28.1024	Os01g0529800	LOC_Os01g34560	AT1G25450.1	CER60,KCS5	3-ketoacyl-CoA synthase 5
11	9072860	9073351	492	9073068	32.1927	8.14933	29.0135	Os11g0265400	LOC_Os11g16410	AT3G03330.1		NAD(P)-binding Rossmann-fold superfamily protein
5	18627400	18627846	447	18627624	33.2184	8.13962	30.0181	Os05g0385400	LOC_Os05g31970	AT5G12340.1
9	16722178	16722573	396	16722402	33.0363	8.07998	29.8401	Os09g0447500	LOC_Os09g27510	AT2G45550.1	CYP76C4	cytochrome P450, family 76, subfamily C, polypeptide 4
2	6956100	6956517	418	6956323	33.5269	8.06901	30.3206	Os02g0224100	LOC_Os02g13100	AT5G36250.1		Protein phosphatase 2C family protein
3	30024793	30025271	479	30025062	38.2414	8.06612	34.9451	Os03g0733000	LOC_Os03g52280	AT5G14105.1
1	37234681	37235387	707	37235144	30.8512	8.04945	27.7001	Os01g0860400	LOC_Os01g64100	AT5G24090.1	ATCHIA,CHIA	chitinase A
11	470272	470649	378	470455	28.2253	8.04301	25.1323	Os11g0109933	LOC_Os11g01872	AT3G08850.1	ATRAPTOR1B,RAPTOR1,RAPTOR1B	HEAT repeat ;WD domain, G-beta repeat protein protein
3	31387131	31387563	433	31387316	30.806	8.03381	27.656	Os03g0758800	LOC_Os03g55150	AT1G13950.1	ATELF5A-1,EIF-5A,EIF5A,ELF5A-1	eukaryotic elongation factor 5A-1
3	4515736	4516203	468	4515983	43.2877	8.01332	39.9021	Os03g0186500	LOC_Os03g08740	AT5G66820.1
12	18528973	18529370	398	18529163	32.2359	7.98889	29.0556	Os12g0491800	LOC_Os12g30824	AT1G79460.1	ATKS,ATKS1,GA2,KS,KS1	Terpenoid cyclases/Protein prenyltransferases superfamily protein
11	9959294	9959707	414	9959456	32.6816	7.96469	29.4921	Os11g0280600	LOC_Os11g17799
1	40983614	40984007	394	40983784	30.5818	7.95652	27.4365	Os01g0934300	LOC_Os01g70810	AT4G02560.2	LD	Homeodomain-like superfamily protein
2	12430594	12431011	418	12430811	31.6093	7.9534	28.443	Os02g0314300	LOC_Os02g21009	AT3G51860.1	ATCAX3,ATHCX1,CAX1-LIKE,CAX3	cation exchanger 3
11	1571461	1571843	383	1571667	28.4849	7.94694	25.3864	Os11g0134166	None
4	33159440	33159827	388	33159641	37.2755	7.94009	33.9961	Os04g0650700	LOC_Os04g55710	AT3G16150.1		N-terminal nucleophile aminohydrolases (Ntn hydrolases) superfamily protein
6	348862	349200	339	349050	37.2755	7.94009	33.9961	Os06g0104900	LOC_Os06g01590	AT4G17260.1		Lactate/malate dehydrogenase family protein
10	19246897	19247327	431	19247124	32.0575	7.93035	28.8816	Os10g0503800	LOC_Os10g36000	AT5G23750.1		Remorin family protein
5	911785	912173	389	911982	33.5892	7.92346	30.3809	Os05g0117000	LOC_Os05g02620
7	29684185	29684643	459	29684442	33.5892	7.92346	30.3809	Os07g0696100	LOC_Os07g49540
2	21425159	21425631	473	21425395	30.4486	7.91085	27.306	Os02g0564400	LOC_Os02g35630	AT1G33360.1		ATP-dependent Clp protease
2	33007039	33007406	368	33007243	30.4486	7.91085	27.306	Os02g0779850	None
5	14382542	14382887	346	14382728	29.9077	7.90219	26.777	Os05g0313100	LOC_Os05g24810
2	2615501	2615970	470	2615816	23.7015	7.88245	20.7169	Os02g0147600	LOC_Os02g05430
1	25680640	25681057	418	25680869	28.3046	7.88109	25.2106	Os01g0639600	LOC_Os01g45250	AT5G62770.1		Protein of unknown function (DUF1645)
11	22917842	22918310	469	22918043	34.9498	7.8656	31.7145	Os11g0599100	None
7	14819869	14820299	431	14820089	34.9498	7.8656	31.7145	Os07g0439750	LOC_Os07g25790
4	7253805	7254176	372	7253980	30.2289	7.8359	27.0925	Os04g0208425	None
6	27926321	27926692	372	27926520	28.1707	7.83241	25.0795	Os06g0672700	LOC_Os06g46060
6	3693353	3693797	445	3693638	31.2161	7.82318	28.057	Os06g0173450	None
7	27780187	27780655	469	27780401	31.2161	7.82318	28.057	Os07g0659300	LOC_Os07g46510	AT5G12340.1
7	4267619	4268046	428	4267812	33.2369	7.81374	30.0359	Os07g0181000	LOC_Os07g08340	AT3G22960.1	PKP-ALPHA,PKP1	Pyruvate kinase family protein
2	4874514	4874939	426	4874695	34.2274	7.80316	31.0071	Os02g0187800	LOC_Os02g09490	AT3G19450.1	ATCAD4,CAD,CAD-C,CAD4	GroES-like zinc-binding alcohol dehydrogenase family protein
2	10989161	10989553	393	10989361	32.1619	7.7978	28.9831	Os02g0290400	LOC_Os02g18830	AT3G57000.1		nucleolar essential protein-related
3	33251109	33251605	497	33251375	29.6048	7.79739	26.4807	Os03g0797902	None
1	10890798	10891251	454	10891008	30.0984	7.7916	26.9642	Os01g0297200	LOC_Os01g19260	AT5G40010.1	AATP1	AAA-ATPase 1
7	4078554	4078983	430	4078764	31.0869	7.78072	27.9311	Os07g0177100	LOC_Os07g08050	AT5G48120.1		ARM repeat superfamily protein
3	28654244	28654624	381	28654418	30.5494	7.7717	27.4048	Os03g0710600	LOC_Os03g50270	AT1G73885.1
2	27439433	27439825	393	27439649	29.4746	7.75263	26.3528	Os02g0673700	LOC_Os02g45200	AT3G61850.4	DAG1	Dof-type zinc finger DNA-binding family protein
11	8566592	8566975	384	8566765	28.3999	7.73205	25.3023	Os11g0258400	None
2	35624423	35624868	446	35624660	35.5072	7.72898	32.2619	Os02g0828900	LOC_Os02g58210	AT1G11950.1		Transcription factor jumonji (jmjC) domain-containing protein
7	28686944	28687331	388	28687142	35.5072	7.72898	32.2619	Os07g0677350	None
8	2916489	2916965	477	2916730	34.969	7.72056	31.7331	Os08g0150700	LOC_Os08g05480	AT2G02250.1	AtPP2-B2,PP2-B2	phloem protein 2-B2
7	8408260	8408982	723	8408466	26.3393	7.71891	23.2906	Os07g0251200	LOC_Os07g14740	AT2G35460.1		Late embryogenesis abundant (LEA) hydroxyproline-rich glycoprotein family
4	32382161	32382538	378	32382341	41.5594	7.71318	38.2045	Os04g0636700	LOC_Os04g54420	AT5G65180.1		ENTH/VHS family protein
5	15708023	15708401	379	15708220	40.4425	7.68846	37.1072	Os05g0336000	None
2	2203708	2204476	769	2204085	30.2954	7.68742	27.1557	Os02g0141000	LOC_Os02g04800	AT2G24390.1		AIG2-like (avirulence induced gene) family protein
8	14169542	14169996	455	14169784	29.7552	7.67589	26.6289	Os08g0323600	LOC_Os08g23430	AT2G04270.2	RNEE/G	RNAse E/G-like
12	5749248	5749719	472	5749522	28.7219	7.66776	25.6186	Os12g0209800	LOC_Os12g10710	AT3G14460.1		LRR and NB-ARC domains-containing disease resistance protein
6	21898426	21898794	369	21898598	29.2172	7.66465	26.1026	Os06g0567433	None
3	8901861	8902240	380	8902057	29.0477	7.6071	25.9364	Os03g0268200	LOC_Os03g16130	AT2G37840.1		Protein kinase superfamily protein
5	17844724	17845259	536	17844899	26.5271	7.60142	23.4735	Os05g0370900	LOC_Os05g30770	AT2G23610.1	ATMES3,MES3	methyl esterase 3
1	30027383	30027818	436	30027620	33.0396	7.59897	29.8424	Os01g0720400	LOC_Os01g52230	AT1G73010.1	ATPS2,PS2	phosphate starvation-induced gene 2
4	34737515	34738285	771	34737735	33.4819	7.58116	30.277	Os04g0680300	LOC_Os04g58380	AT4G21720.1
1	29888866	29889294	429	29889095	27.4324	7.56754	24.359	Os01g0717650	None
3	4473051	4473424	374	4473285	26.894	7.55328	23.8323	Os03g0185300	None
11	22245792	22246339	548	22246080	40.8926	7.55066	37.5488	Os11g0587300	LOC_Os11g37670	AT3G63430.1
10	12892923	12893292	370	12893094	28.7552	7.50843	25.6516	Os10g0389300	LOC_Os10g25040	AT4G37000.1	ACD2,ATRCCR	accelerated cell death 2 (ACD2)
3	6452007	6452396	390	6452192	29.7096	7.49547	26.5837	Os03g0223200	LOC_Os03g12270	AT4G37970.1	ATCAD6,CAD6	cinnamyl alcohol dehydrogenase 6
9	13996545	13996983	439	13996782	29.2116	7.49502	26.0971	Os09g0400200	None
2	24326538	24326946	409	24326753	27.6772	7.47913	24.5967	Os02g0615500	LOC_Os02g40200	AT3G47570.1		Leucine-rich repeat protein kinase family protein
2	13095757	13096216	460	13096028	29.1227	7.46571	26.6985	Os02g0325600	LOC_Os02g22020	AT1G25550.1		myb-like transcription factor family protein
2	18940758	18941164	407	18940960	28.0922	7.45185	25.0019	Os02g0520100	LOC_Os02g32060	AT1G12880.1	atnudt12,NUDT12	nudix hydrolase homolog 12
7	28869779	28870314	536	28870042	27.0965	7.449	24.0296	Os07g0681100	LOC_Os07g48310	AT5G58300.2		Leucine-rich repeat protein kinase family protein
3	6427386	6427843	458	6427632	33.4808	7.43596	30.276	Os03g0223000	LOC_Os03g12238	AT5G17610.1
5	6085480	6085845	366	6085676	27.0092	7.41838	23.9442	Os05g0198200	LOC_Os05g10930	AT5G11930.1		Thioredoxin superfamily protein
11	8977629	8977991	363	8977823	25.5207	7.41318	22.4924	Os11g0264300	LOC_Os11g16290	AT2G43500.1	NLP8	Plant regulator RWP-RK family protein
5	28501334	28501923	590	28501647	34.8688	7.40934	31.6367	Os05g0572000	LOC_Os05g49700	AT1G64380.1		Integrase-type DNA-binding superfamily protein
4	26180421	26180918	498	26180643	26.4743	7.40303	23.4234	Os04g0523200	LOC_Os04g44220	AT2G39260.1		binding;RNA binding
1	11525745	11526160	416	11525975	28.9258	7.40111	25.8172	Os01g0308300	LOC_Os01g20720	AT3G14470.1		NB-ARC domain-containing disease resistance protein
1	6619668	6620138	471	6619888	26.9312	7.39111	23.8688	Os01g0220900	LOC_Os01g12150	AT4G11650.1	ATOSM34,OSM34	osmotin 34
11	24559691	24560047	357	24559867	28.3884	7.38595	25.2921	Os11g0626700	LOC_Os11g41034
1	21558212	21558627	416	21558388	29.7722	7.3575	26.6446	Os01g0564600	LOC_Os01g38380	AT3G50160.1		Plant protein of unknown function (DUF247)
9	17299145	17299947	803	17299558	29.7722	7.3575	26.6446	Os09g0457532	None
6	26449136	26449472	337	26449291	32.6853	7.34886	29.4956	Os06g0647200	LOC_Os06g43910	AT2G25180.1	ARR12,RR12	response regulator 12
2	24690523	24690902	380	24690722	28.2705	7.34689	25.8594	Os02g0620600	LOC_Os02g40730	AT4G13510.1	AMT1;1,ATAMT1,ATAMT1;1	ammonium transporter 1;1
5	648059	648391	333	648242	28.225	7.33183	25.1322	Os05g0112125	None
8	3191019	3191489	471	3191219	28.225	7.33183	25.1322	Os08g0155400	LOC_Os08g05910	AT1G12110.1	ATNRT1,B-1,CHL1,CHL1-1,NRT1,NRT1.1	nitrate transporter 1.1
4	20250479	20250859	381	20250696	27.6853	7.31454	24.6042	Os04g0409500	LOC_Os04g33470	AT3G09970.1		Calcineurin-like metallo-phosphoesterase superfamily protein
2	25433461	25433834	374	25433679	30.5273	7.28873	27.3834	Os02g0634600	LOC_Os02g42300	AT5G23200.1
4	23050284	23050676	393	23050502	26.0254	7.2445	22.9845	Os04g0461400	None
1	29297576	29297972	397	29297749	24.5673	7.24078	21.5615	Os01g0706266	LOC_Os01g50990	AT1G13570.1		F-box/RNI-like superfamily protein
11	13202786	13203329	544	13203007	25.5256	7.23852	22.4971	Os11g0421800	LOC_Os11g22960
12	872232	872662	431	872445	27.4479	7.23522	24.3727	Os12g0117900	None
3	8598336	8598749	414	8598520	27.4459	7.23456	24.3718	Os03g0262300	LOC_Os03g15580	AT1G77620.1		P-loop containing nucleoside triphosphate hydrolases superfamily protein
11	11204597	11205122	526	11204869	26.4453	7.22271	23.3949	Os11g0300400	LOC_Os11g19460	AT1G79790.1		Haloacid dehalogenase-like hydrolase (HAD) superfamily protein
9	21208005	21208389	385	21208193	31.7592	7.22216	28.5888	Os09g0538700	LOC_Os09g36760	AT3G51290.2		Protein of unknown function (DUF630) ;Protein of unknown function (DUF632)
11	22471685	22472114	430	22471907	26.9059	7.21534	23.8437	Os11g0591200	LOC_Os11g37900	AT1G04220.1	KCS2	3-ketoacyl-CoA synthase 2
12	2175149	2175512	364	2175317	31.2197	7.20585	28.0604	Os12g0144200	LOC_Os12g05010
6	30919878	30920317	440	30920144	27.8283	7.20153	24.7451	Os06g0726800	LOC_Os06g51110	AT1G20610.1	CYCB2;3	Cyclin B2;3
12	27485447	27485832	386	27485617	25.3251	7.16723	22.3009	Os12g0640900	LOC_Os12g44340	AT1G24764.1	ATMAP70-2,MAP70-2	microtubule-associated proteins 70-2
11	22553607	22553971	365	22553784	34.4227	7.1581	31.1986	Os11g0592700	LOC_Os11g38020	AT5G57960.1		GTP-binding protein, HflX
5	24285411	24285889	479	24285610	34.4227	7.1581	31.1986	Os05g0494500	LOC_Os05g41480	AT4G32390.1		Nucleotide-sugar transporter family protein
12	3404948	3405338	391	3405122	25.7464	7.14711	22.7108	Os12g0167700	LOC_Os12g06980	AT1G76740.1
4	16159507	16159823	317	16159680	26.2079	7.14136	23.1618	Os04g0341500	LOC_Os04g27340	AT3G14520.1		Terpenoid cyclases/Protein prenyltransferases superfamily protein
4	24855008	24855529	522	24855220	25.7069	7.13341	22.6735	Os04g0496800	LOC_Os04g41950	AT1G65540.1		LETM1-like protein
11	9765876	9766363	488	9766079	22.3479	7.12409	19.3982	Os11g0275400	LOC_Os11g17530	AT2G37320.1		Tetratricopeptide repeat (TPR)-like superfamily protein
7	20062667	20063062	396	20062874	28.5209	7.11608	25.4213	Os07g0519600	LOC_Os07g33580	AT5G36110.1	CYP716A1	cytochrome P450, family 716, subfamily A, polypeptide 1
8	24473731	24474129	399	24473940	27.4026	7.06345	24.33	Os08g0495800	LOC_Os08g38710	AT1G55740.1	AtSIP1,SIP1	seed imbibition 1
2	25664802	25665207	406	25665019	24.5474	7.05996	21.542	Os02g0639700	LOC_Os02g42670	AT3G15390.1	SDE5	silencing defective 5
2	29790372	29790934	563	29790654	26.9007	7.05456	23.8387	Os02g0717600	LOC_Os02g48640	AT4G12070.1
6	15737907	15738320	414	15738103	23.5844	7.05367	20.6032	Os06g0472400	LOC_Os06g27800	AT5G66420.2
10	12869753	12870269	517	12870032	36.3222	7.0335	33.0611	Os10g0388900	LOC_Os10g25000	AT4G37020.1
5	14571577	14571990	414	14571782	36.3222	7.0335	33.0611	Os05g0315700	LOC_Os05g25150	AT5G17540.1		HXXXD-type acyl-transferase family protein
3	27538172	27538550	379	27538350	28.682	7.01877	25.5792	Os03g0689688	None
1	32329952	32330787	836	32330185	26.6725	6.98013	23.6156	Os01g0767000	LOC_Os01g56140	AT5G65770.1	LINC4	little nuclei4
4	27940976	27941390	415	27941219	24.3138	6.97685	21.3137	Os04g0557500	LOC_Os04g47059	AT1G63650.2	ATMYC-2,EGL1,EGL3	basic helix-loop-helix (bHLH) DNA-binding superfamily protein
5	18138362	18138736	375	18138554	27.6023	6.97655	24.5236	Os05g0375700	LOC_Os05g31170	AT2G03200.1		Eukaryotic aspartyl protease family protein
12	12984788	12985320	533	12985094	23.3486	6.96672	20.3732	Os12g0418600	LOC_Os12g22970
6	25715684	25716082	399	25715899	24.2753	6.96319	21.2768	Os06g0634100	LOC_Os06g42770	AT1G74350.1		Intron maturase, type II family protein
2	21533510	21533875	366	21533693	22.8467	6.95397	19.8842	Os02g0566500	LOC_Os02g35840	AT4G08460.1		Protein of unknown function (DUF1644)
5	19644823	19645269	447	19645053	24.2368	6.94958	21.2394	Os05g0403300	LOC_Os05g33430	AT1G03220.1		Eukaryotic aspartyl protease family protein
7	20094329	20094722	394	20094547	25.1652	6.94699	22.1454	Os07g0520400	LOC_Os07g33630	AT1G50890.1		ARM repeat superfamily protein
2	22817718	22818588	871	22818339	23.7345	6.93709	20.7493	Os02g0590700	None
3	12124302	12124708	407	12124474	27.0076	6.93694	24.614	Os03g0329900	LOC_Os03g21240	AT4G28610.1	AtPHR1,PHR1	phosphate starvation response 1
1	34841174	34841554	381	34841334	25.5938	6.93375	22.5635	Os01g0818100	None
7	27994661	27995317	657	27995078	26.9953	6.93303	23.9311	Os07g0663600	LOC_Os07g46840	AT3G26770.1		NAD(P)-binding Rossmann-fold superfamily protein
1	34314220	34314788	569	34314546	29.8024	6.93183	26.6737	Os01g0808100	LOC_Os01g59350	AT3G12250.2	BZIP45,TGA6	TGACG motif-binding factor 6
9	19277582	19277963	382	19277746	29.8024	6.93183	26.6737	Os09g0498500	LOC_Os09g32290	AT2G24580.1		FAD-dependent oxidoreductase family protein
5	20758287	20758754	468	20758481	36.834	6.92972	33.564	Os05g0423400	LOC_Os05g34940	AT5G20240.1	PI	K-box region and MADS-box transcription factor family protein
4	32480566	32481015	450	32480790	39.6495	6.92911	36.3274	Os04g0639200	LOC_Os04g54630	AT2G21970.1	43710	stress enhanced protein 2
9	15618022	15618443	422	15618257	26.0194	6.91989	22.979	Os09g0429400	LOC_Os09g25990	AT2G29120.1	ATGLR2.7,GLR2.7	glutamate receptor 2.7
3	18146999	18147400	402	18147195	23.6577	6.90949	20.675	Os03g0432000	LOC_Os03g31740	AT1G59590.1	ZCF37	ZCF37
10	14521998	14522374	377	14522176	24.122	6.90908	21.1274	Os10g0415400	LOC_Os10g28009
7	1280884	1281232	349	1281063	24.5866	6.90868	21.5804	Os07g0124600	LOC_Os07g03240	AT4G26650.1		RNA-binding (RRM/RBD/RNP motifs) family protein
4	21350103	21350465	363	21350276	21.2623	6.88082	18.3415	Os04g0430600	LOC_Os04g35130	AT1G45688.1
6	2502949	2503384	436	2503107	24.4357	6.85661	21.4331	Os06g0147800	LOC_Os06g05520	AT4G29810.1	ATMKK2,MK1,MKK2	MAP kinase kinase 2
6	3437835	3438446	612	3438092	23.9327	6.8426	20.9426	Os06g0168400	LOC_Os06g07190	AT1G75670.2		DNA-directed RNA polymerases
1	41008372	41008878	507	41008564	26.6922	6.83702	23.6348	Os01g0934900	LOC_Os01g70860	AT2G23620.1	ATMES1,MES1	methyl esterase 1
1	1256808	1257289	482	1257073	18.8133	6.81725	15.9626	Os01g0122367	None
4	27254764	27255159	396	27254962	28.902	6.80579	25.7937	Os04g0544200	LOC_Os04g46000	AT2G44740.1	CYCP4;1	cyclin p4;1
6	27382766	27383238	473	27383064	30.2862	6.80511	27.1478	Os06g0663400	LOC_Os06g45300	AT4G31170.2		Protein kinase superfamily protein
1	34625763	34626098	336	34625931	25.6489	6.79885	22.6169	Os01g0814100	LOC_Os01g59870	AT3G43720.2		Bifunctional inhibitor/lipid-transfer protein/seed storage 2S albumin superfamily protein
11	16388356	16388746	391	16388522	26.0869	6.79154	23.0431	Os11g0474500	LOC_Os11g28470	AT3G14470.1		NB-ARC domain-containing disease resistance protein
7	19631907	19632262	356	19632087	24.6806	6.78302	21.6715	Os07g0512250	LOC_Os07g32810	AT4G04630.1		Protein of unknown function, DUF584
4	8767743	8768189	447	8767967	23.2756	6.7733	20.3018	Os04g0231266	None
6	11294807	11295174	368	11294993	23.2423	6.76154	20.2697	Os06g0301400	LOC_Os06g19740
7	25443528	25443907	380	25443733	24.5688	6.74552	21.5629	Os07g0617000	LOC_Os07g42510	AT3G16770.1	ATEBP,EBP,ERF72,RAP2.3	ethylene-responsive element binding protein
1	8343916	8344242	327	8344065	22.7388	6.74498	19.7792	Os01g0252600	LOC_Os01g14890	AT4G01935.1
7	22697523	22698008	486	22697748	22.7388	6.74498	19.7792	Os07g0565800	LOC_Os07g37850	AT2G20870.1		cell wall protein precursor, putative
10	2553703	2554017	315	2553871	33.655	6.72319	30.4457	Os10g0141700	LOC_Os10g05210	AT5G15710.1		Galactose oxidase/kelch repeat superfamily protein
8	903141	904019	879	903339	23.1311	6.72228	20.1607	Os08g0116500	LOC_Os08g02340	AT5G24510.1		60S acidic ribosomal protein family
4	24374907	24375540	634	24375297	21.7315	6.70959	18.798	Os04g0488000	LOC_Os04g41100	AT1G67580.2		Protein kinase superfamily protein
7	17888456	17888827	372	17888635	23.0943	6.70929	20.1257	Os07g0486100	LOC_Os07g30250	AT5G07630.1		lipid transporters
5	17678743	17679185	443	17678948	23.9921	6.705	21	Os05g0368100	LOC_Os05g30510
2	32494660	32495029	370	32494810	25.7908	6.69749	22.7546	Os02g0770600	LOC_Os02g53110	AT1G68140.3		Protein of unknown function (DUF1644)
7	11058292	11058717	426	11058507	23.4518	6.67562	20.4726	Os07g0287000	LOC_Os07g18710	AT1G69630.1		F-box/RNI-like superfamily protein
8	5852089	5852716	628	5852385	20.7239	6.67081	17.8184	Os08g0200600	LOC_Os08g10080	AT1G56010.2	anac021,ANAC022,NAC1	NAC domain containing protein 1
7	5657513	5657919	407	5657700	22.9842	6.67064	20.0182	Os07g0205200	LOC_Os07g10520	AT5G25150.1	TAF5	TBP-associated factor 5
1	23758242	23758565	324	23758378	27.054	6.6662	23.9883	Os01g0603300	LOC_Os01g41900	AT5G56840.1		myb-like transcription factor family protein
8	15475894	15476322	429	15476082	26.5983	6.66576	23.5432	Os08g0343000	LOC_Os08g25430	AT4G23230.1	CRK15	cysteine-rich RLK (RECEPTOR-like protein kinase) 15
1	41954338	41954699	362	41954540	22.5169	6.66542	19.5631	Os01g0952600	LOC_Os01g72340	AT3G54440.1		glycoside hydrolase family 2 protein
5	23250502	23251033	532	23250740	26.0816	6.64639	23.0391	Os05g0473401	LOC_Os05g39600	AT2G13620.1	ATCHX15,CHX15	cation/hydrogen exchanger 15
2	22510933	22511324	392	22511147	22.9114	6.64512	19.9467	Os02g0583700	LOC_Os02g37250
4	33819169	33819512	344	33819339	22.9114	6.64512	19.9467	Os04g0662700	LOC_Os04g56710	AT3G07270.2		GTP cyclohydrolase I
5	27550057	27550595	539	27550306	24.7117	6.64257	21.7019	Os05g0554100	LOC_Os05g48050	AT1G70190.1		Ribosomal protein L7/L12, oligomerisation;Ribosomal protein L7/L12, C-terminal/adaptor protein ClpS-like
7	27933128	27933519	392	27933338	21.5455	6.64052	18.6168	Os07g0661900	LOC_Os07g46730	AT1G01970.1		Tetratricopeptide repeat (TPR)-like superfamily protein
1	7324735	7325035	301	7324880	22.4072	6.62635	19.455	Os01g0232300	LOC_Os01g13150	AT3G16260.1	TRZ4	tRNAse Z4
6	9148686	9149029	344	9148836	23.307	6.62586	20.3321	Os06g0271900	None
4	26900290	26900679	390	26900539	24.172	6.61365	21.1764	Os04g0537800	LOC_Os04g45460	AT3G60720.1	PDLP8	plasmodesmata-located protein 8
5	28260778	28261096	319	28260912	24.172	6.61365	21.1764	Os05g0567650	None
7	29558232	29558623	392	29558416	22.3346	6.60055	19.3852	Os07g0694200	LOC_Os07g49350
1	18355272	18355560	289	18355412	32.6732	6.59375	29.4838	Os01g0517500	LOC_Os01g33300	AT2G15450.1		Pectin lyase-like superfamily protein
1	4974266	4974697	432	4974402	20.9578	6.58874	18.0456	Os01g0192300	LOC_Os01g09640	AT5G47390.1		myb-like transcription factor family protein
12	149200	149626	427	149418	23.6323	6.58368	20.6501	Os12g0103150	LOC_Os12g01250
3	8130141	8130507	367	8130292	23.1636	6.57685	20.1926	Os03g0254200	LOC_Os03g14910
5	26943089	26943407	319	26943251	36.152	6.56442	32.8952	Os05g0542900	LOC_Os05g46520	AT1G80170.1		Pectin lyase-like superfamily protein
1	1926881	1927253	373	1927085	24.8983	6.55796	21.8836	Os01g0135600	LOC_Os01g04324
12	14974238	14974841	604	14974628	18.2038	6.55537	15.3716	Os12g0444800	LOC_Os12g25820	AT4G35160.1		O-methyltransferase family protein
11	10327749	10328107	359	10327915	27.125	6.55373	24.0569	Os11g0286500	LOC_Os11g18320
5	1221504	1222022	519	1221790	27.125	6.55373	24.0569	Os05g0122400	LOC_Os05g03100	AT5G02880.1	UPL4	ubiquitin-protein ligase 4
2	7335862	7336238	377	7336065	21.2896	6.54618	18.3681	Os02g0230625	None
3	31502786	31503380	595	31503007	23.057	6.54056	20.0895	Os03g0761900	LOC_Os03g55380	AT4G33910.1		2-oxoglutarate (2OG) and Fe(II)-dependent oxygenase superfamily protein
3	23779571	23779897	327	23779727	22.1548	6.53692	19.2105	Os03g0625300	LOC_Os03g42710	AT3G50390.1		Transducin/WD40 repeat-like superfamily protein
6	22396214	22396683	470	22396449	25.7111	6.53245	22.6765	Os06g0577350	None
12	2708104	2708475	372	2708290	22.1191	6.52434	19.1752	Os12g0155100	LOC_Os12g05890	AT5G22390.1		Protein of unknown function (DUF3049)
1	42701629	42701966	338	42701804	24.297	6.50856	21.297	Os01g0968100	LOC_Os01g73700	AT3G19430.1		late embryogenesis abundant protein-related / LEA protein-related
6	23921240	23921618	379	23921418	24.297	6.50856	21.297	Os06g0604300	LOC_Os06g40180	AT3G15730.1	PLD,PLDALPHA1	phospholipase D alpha 1
9	17787527	17787820	294	17787657	24.297	6.50856	21.297	Os09g0468150	LOC_Os09g29300	AT4G40080.1		ENTH/ANTH/VHS superfamily protein
1	5702212	5702572	361	5702388	25.6298	6.50763	22.5984	Os01g0203800	LOC_Os01g10680	AT1G53380.3		Plant protein of unknown function (DUF641)
3	11109320	11109767	448	11109551	23.8203	6.49817	20.8319	Os03g0311300	LOC_Os03g19760	AT1G56500.1		haloacid dehalogenase-like hydrolase family protein
11	21036871	21037355	485	21037200	22.0126	6.4869	19.0708	Os11g0564800	None
4	33160131	33161360	1230	33161227	22.4467	6.48386	19.4939	Os04g0650700	LOC_Os04g55710	AT3G16150.1		N-terminal nucleophile aminohydrolases (Ntn hydrolases) superfamily protein
4	33393500	33393935	436	33393739	20.6766	6.4836	17.7717	Os04g0654700	LOC_Os04g56070	AT1G22920.1	AJH1,CSN5A,JAB1	COP9 signalosome 5A
11	1537044	1537529	486	1537225	21.1098	6.48041	18.1941	Os11g0133200	LOC_Os11g03850	AT3G53700.1	MEE40	Pentatricopeptide repeat (PPR) superfamily protein
12	19694412	19694712	301	19694559	21.1098	6.48041	18.1941	Os12g0511200	LOC_Os12g32640	AT4G37680.2	HHP4	heptahelical protein 4
3	22760691	22761056	366	22760890	25.0915	6.47887	22.0732	Os03g0606466	None
8	7779344	7779831	488	7779621	29.0799	6.47638	25.9676	Os08g0227400	LOC_Os08g13090	AT3G06190.1	ATBPM2,BPM2	BTB-POZ and MATH domain 2
6	1502475	1502787	313	1502631	23.2465	6.45521	20.2737	Os06g0128300	LOC_Os06g03770	AT5G58270.1	ATATM3,ATM3,STA1	ABC transporter of the mitochondrion 3
6	4498202	4498543	342	4498350	27.6645	6.45329	24.5845	Os06g0188950	None
1	37672248	37672592	345	37672418	25.8281	6.4338	22.7907	Os01g0869300	LOC_Os01g64900	AT1G77600.3		ARM repeat superfamily protein
12	13384291	13384712	422	13384468	26.2487	6.42769	23.2013	Os12g0423313	None
8	17624445	17624872	428	17624611	26.2487	6.42769	23.2013	Os08g0375700	LOC_Os08g28820	AT1G20140.1	ASK4,SK4	SKP1-like 4
2	5704489	5704989	501	5704692	22.7017	6.42051	20.3778	Os02g0202200	LOC_Os02g10780	AT5G20150.1	ATSPX1,SPX1	SPX domain gene 1
10	21104226	21104561	336	21104396	20.4981	6.4174	17.5993	Os10g0540900	LOC_Os10g39510
9	19534842	19535460	619	19535231	20.8973	6.40322	17.9865	Os09g0505200	LOC_Os09g32750	AT3G07220.1		SMAD/FHA domain-containing protein
3	13663116	13663546	431	13663354	34.4387	6.38207	31.2139	Os03g0356484	LOC_Os03g24060	AT3G57090.1	BIGYIN,FIS1A	Tetratricopeptide repeat (TPR)-like superfamily protein
2	30058737	30059180	444	30058887	19.0896	6.37977	16.2309	Os02g0723300	LOC_Os02g49150	AT4G15950.1	NRPD4,NRPE4,RDM2	RNA polymerase II, Rpb4, core protein
2	24683225	24683631	407	24683472	24.7532	6.37482	21.7419	Os02g0620500	LOC_Os02g40710	AT4G13510.1	AMT1;1,ATAMT1,ATAMT1;1	ammonium transporter 1;1
7	20111965	20112452	488	20112217	23.4089	6.36481	20.4325	Os07g0520800	LOC_Os07g33660	AT1G50900.1		Ankyrin repeat family protein
11	226259	226644	386	226452	17.2858	6.35051	14.4833	Os11g0104800	LOC_Os11g01370	AT3G55990.1	ESK1,TBL29	Plant protein of unknown function (DUF828)
8	21447116	21447630	515	21447427	21.1587	6.34081	18.2403	Os08g0440850	None
1	20815604	20815999	396	20815810	21.1243	6.32868	18.207	Os01g0553600	LOC_Os01g37280
7	5647680	5648267	588	5648004	25.3809	6.30166	22.3554	Os07g0204900	LOC_Os07g10490	AT3G04870.1	PDE181,SPC1,ZDS	zeta-carotene desaturase
7	26485735	26486207	473	26485950	20.1831	6.30159	17.2924	Os07g0637300	LOC_Os07g44330	AT3G06483.1	ATPDHK,PDK	pyruvate dehydrogenase kinase
4	1573009	1573318	310	1573176	18.4413	6.29461	15.6021	Os04g0125700	LOC_Os04g03579	AT5G10530.1		Concanavalin A-like lectin protein kinase family protein
2	21752218	21752583	366	21752386	20.5849	6.29082	17.6819	Os02g0570300	None
11	21287651	21288074	424	21287875	20.5812	6.2895	17.6786	Os11g0569800	LOC_Os11g36190	AT3G47570.1		Leucine-rich repeat protein kinase family protein
4	12377957	12378309	353	12378144	20.5812	6.2895	17.6786	Os04g0286366	None
6	7724316	7724860	545	7724568	20.5812	6.2895	17.6786	Os06g0248600	LOC_Os06g13880
8	903141	904019	879	903882	20.9875	6.28062	18.0739	Os08g0116500	LOC_Os08g02340	AT5G24510.1		60S acidic ribosomal protein family
1	25232545	25232873	329	25232711	23.1409	6.2789	20.1702	Os01g0631200	LOC_Os01g44050	AT5G40850.1	UPM1	urophorphyrin methylase 1
2	4579401	4579753	353	4579590	20.9535	6.26872	18.0417	Os02g0182100	LOC_Os02g08500	AT2G25180.1	ARR12,RR12	response regulator 12
6	27848549	27848964	416	27848789	23.9629	6.26582	20.9716	Os06g0671300	LOC_Os06g45960	AT3G26300.1	CYP71B34	cytochrome P450, family 71, subfamily B, polypeptide 34
9	2131189	2131551	363	2131370	23.9629	6.26582	20.9716	Os09g0127800	LOC_Os09g04110	AT1G62020.1		Coatomer, alpha subunit
7	2613376	2613691	316	2613530	20.0455	6.25145	17.1582	Os07g0150200	LOC_Os07g05580	AT2G32060.1		Ribosomal protein L7Ae/L30e/S12e/Gadd45 family protein
3	10006860	10007288	429	10007067	27.3578	6.24913	24.2856	Os03g0289100	LOC_Os03g17980	AT3G01090.2	AKIN10,KIN10,SNRK1.1	SNF1 kinase homolog 10
9	14108326	14108708	383	14108507	27.3578	6.24913	24.2856	Os09g0402100	LOC_Os09g23730	AT1G14900.1	HMGA	high mobility group A
2	15584849	15585186	338	15585021	21.3233	6.24784	18.401	Os02g0464400	LOC_Os02g26550	AT5G45790.2		Ubiquitin carboxyl-terminal hydrolase family protein
6	16525469	16525927	459	16525661	21.3233	6.24784	18.401	Os06g0484950	LOC_Os06g28990
1	28103335	28103679	345	28103511	20.8718	6.24015	18.5815	Os01g0682001	LOC_Os01g48960	AT5G53460.1	GLT1	NADH-dependent glutamate synthase 1
1	40634935	40635309	375	40635141	22.5443	6.22558	19.589	Os01g0926700	LOC_Os01g70200	AT1G27440.1	ATGUT1,GUT2,IRX10	Exostosin family protein
3	7369884	7370270	387	7370061	19.5402	6.22311	16.6683	Os03g0239400	LOC_Os03g13614	AT2G35530.1	AtbZIP16,bZIP16	basic region/leucine zipper transcription factor 16
10	11413804	11414187	384	11414026	20.8185	6.22156	17.9103	Os10g0365800	LOC_Os10g22100
4	26507816	26508249	434	26508077	20.3808	6.21805	17.4843	Os04g0529800	LOC_Os04g44750	AT2G20780.1		Major facilitator superfamily protein
2	28784801	28785186	386	28784970	21.6609	6.21694	18.7301	Os02g0699700	LOC_Os02g47150	AT3G23890.1	ATTOPII,TOPII	topoisomerase II
9	19164475	19164829	355	19164642	20.7849	6.20988	17.8778	Os09g0494600	LOC_Os09g32100	AT5G10580.1		Protein of unknown function, DUF599
6	4457484	4457935	452	4457688	20.7177	6.1865	18.4324	Os06g0188400	LOC_Os06g08880	AT5G11210.1	ATGLR2.5,GLR2.5	glutamate receptor 2.5
12	10322801	10323119	319	10322957	21.1248	6.18008	18.207	Os12g0277900	LOC_Os12g17950
7	21389046	21389442	397	21389271	27.926	6.17242	24.8404	Os07g0541500	LOC_Os07g35700	AT4G23160.1	CRK8	cysteine-rich RLK (RECEPTOR-like protein kinase) 8
6	12678299	12678661	363	12678494	21.4667	6.15206	19.1672	Os06g0324800	LOC_Os06g21920	AT1G76430.1	PHT1;9	phosphate transporter 1;9
2	2646162	2646602	441	2646397	21.3978	6.12917	18.4744	Os02g0148100	LOC_Os02g05480	AT1G10210.1	ATMPK1,MPK1	mitogen-activated protein kinase 1
1	35892719	35893119	401	35892900	19.7046	6.12823	16.828	Os01g0837200	LOC_Os01g62010	AT2G39420.1		alpha/beta-Hydrolases superfamily protein
7	17489551	17489964	414	17489734	21.3653	6.11837	18.4422	Os07g0480800	LOC_Os07g29750	AT2G36870.1	XTH32	xyloglucan endotransglucosylase/hydrolase 32
9	7912159	7912487	329	7912306	19.2363	6.11125	16.3729	Os09g0306700	LOC_Os09g13610	AT1G25540.1	PFT1	phytochrome and flowering time regulatory protein (PFT1)
2	669306	669676	371	669468	23.0268	6.1092	20.0596	Os02g0112600	LOC_Os02g02190	AT1G08090.1	ACH1,ATNRT2.1,ATNRT2:1,LIN1,NRT2,NRT2.1,NRT2:1,NRT2;1AT	nitrate transporter 2:1
5	23008663	23009025	363	23008838	21.3328	6.10762	18.4102	Os05g0468700	LOC_Os05g39240	AT2G38290.1	AMT2,AMT2;1,ATAMT2	ammonium transporter 2
2	13127757	13128176	420	13127972	21.74	6.1028	18.8061	Os02g0326000	LOC_Os02g22060	AT1G26180.1
3	28889246	28889622	377	28889425	28.5016	6.10259	25.4028	Os03g0714100	LOC_Os03g50590
7	6260807	6261135	329	6260966	21.6823	6.08409	18.7497	Os07g0214300	LOC_Os07g11380
9	20436758	20437185	428	20436976	17.8874	6.07694	15.0649	Os09g0523200	LOC_Os09g35560
7	27807278	27807576	299	27807421	19.9495	6.06602	17.0662	Os07g0659800	LOC_Os07g46560	AT4G27880.1		Protein with RING/U-box and TRAF-like domains
1	33822045	33822355	311	33822202	21.6116	6.06119	18.6817	Os01g0799000	LOC_Os01g58520	AT5G45520.1		Leucine-rich repeat (LRR) family protein
10	21958654	21959013	360	21958829	23.671	6.04959	20.6873	Os10g0557900	LOC_Os10g40830	AT4G16640.1		Matrixin family protein
4	27703045	27703413	369	27703243	19.4774	6.04695	16.6068	Os04g0553300	LOC_Os04g46730	AT1G68260.1		Thioesterase superfamily protein
7	5658408	5658786	379	5658576	19.0378	6.03888	16.1801	Os07g0205200	LOC_Os07g10520	AT5G25150.1	TAF5	TBP-associated factor 5
6	7236630	7237151	522	7236890	17.7865	6.0378	14.9673	Os06g0239300	LOC_Os06g13200	AT5G14940.1		Major facilitator superfamily protein
1	18071552	18071932	381	18071758	20.2613	6.02935	17.3676	Os01g0512700	LOC_Os01g32920	AT1G67030.1	ZFP6	zinc finger protein 6
3	30209132	30209487	356	30209289	20.2613	6.02935	17.3676	Os03g0737000	LOC_Os03g52690	AT5G10860.1		Cystathionine beta-synthase (CBS) family protein
3	12682015	12682319	305	12682168	19.3797	6.01225	16.5127	Os03g0340500	LOC_Os03g22120	AT4G02280.1	ATSUS3,SUS3	sucrose synthase 3
1	27623102	27623728	627	27623451	18.126	6.00893	15.2965	Os01g0672700	LOC_Os01g48210	AT5G53770.1		Nucleotidyltransferase family protein
3	24222730	24223750	1021	24222941	20.1955	6.0069	17.3048	Os03g0634000	LOC_Os03g43430	AT5G28750.1		Bacterial sec-independent translocation protein mttA/Hcf106
8	16987936	16988348	413	16988139	21.4213	5.99983	18.4959	Os08g0366200	LOC_Os08g27860	AT1G17455.1	ELF4-L4	ELF4-like 4
6	8016325	8016820	496	8016624	22.2511	5.99919	19.3031	Os06g0254700	LOC_Os06g14370	AT1G70670.1		Caleosin-related family protein
9	14113139	14113619	481	14113349	19.6912	5.9761	16.8155	Os09g0402300	LOC_Os09g23740	AT1G71010.1	FAB1C	FORMS APLOID AND BINUCLEATE CELLS 1C
1	28849554	28849907	354	28849711	18.4023	5.95798	15.5638	Os01g0697100	LOC_Os01g50200	AT3G16520.3	UGT88A1	UDP-glucosyl transferase 88A1
1	39776774	39777199	426	39776982	20.8302	5.9426	17.9206	Os01g0912700	LOC_Os01g68450	AT1G65230.1		Uncharacterized conserved protein (DUF2358)
8	23628869	23629194	326	23629030	20.0048	5.94216	17.1193	Os08g0478800	LOC_Os08g37380	AT4G24620.1	PGI,PGI1	phosphoglucose isomerase 1
1	25286681	25287057	377	25286860	19.564	5.93213	16.6909	Os01g0631800	LOC_Os01g44120
3	18551278	18551673	396	18551452	22.8293	5.92356	19.867	Os03g0439250	LOC_Os03g32440
9	1471284	1471910	627	1471593	22.8293	5.92356	19.867	Os09g0119100	LOC_Os09g03090	AT5G32440.3		Ubiquitin system component Cue protein
8	25112139	25112550	412	25112366	18.6823	5.91057	15.8352	Os08g0507100	LOC_Os08g39660	AT2G45550.1	CYP76C4	cytochrome P450, family 76, subfamily C, polypeptide 4
6	29853055	29853502	448	29853262	23.1636	5.901	20.1926	Os06g0706600	LOC_Os06g49260	AT1G21240.1	WAK3	wall associated kinase 3
3	28099166	28099485	320	28099323	19.8792	5.89977	16.9975	Os03g0700500	LOC_Os03g49360
7	23978654	23979072	419	23978899	18.6505	5.89917	15.8041	Os07g0588700	LOC_Os07g39970	AT1G27730.1	STZ,ZAT10	salt tolerance zinc finger
9	17905639	17906020	382	17905796	18.2414	5.89895	15.4081	Os09g0470701	None
12	13404531	13404927	397	13404715	17.4243	5.89847	14.6161	Os12g0424180	LOC_Os12g23610	ATMG00410.1		ATPase subunit 6-1
1	5808814	5809379	566	5809150	16.6088	5.89793	13.8273	Os01g0206650	None
4	26088172	26089086	915	26088859	17.392	5.88612	14.5846	Os04g0520900	LOC_Os04g44030	AT3G62470.1		Pentatricopeptide repeat (PPR) superfamily protein
5	5653569	5654001	433	5653800	16.9837	5.88549	14.1899	Os05g0192200	None
1	5292765	5293180	416	5292986	23.4153	5.85577	20.4376	Os01g0197900	LOC_Os01g10130	AT2G19910.1		RNA-dependent RNA polymerase family protein
3	11732209	11732667	459	11732408	18.5241	5.85403	15.6825	Os03g0323600	LOC_Os03g20730	AT4G13830.2	J20	DNAJ-like 20
7	20747622	20748020	399	20747801	19.724	5.84763	16.8467	Os07g0530300	LOC_Os07g34610	AT2G20830.2		transferases;folic acid binding
1	31565047	31565353	307	31565195	21.3375	5.84359	18.4147	Os01g0752400	LOC_Os01g54880	AT2G42390.1		protein kinase C substrate, heavy chain-related
10	11622510	11622936	427	11622741	27.436	5.84076	24.3625	Os10g0369900	LOC_Os10g22450	AT2G22240.1	ATIPS2,ATMIPS2,MIPS2	myo-inositol-1-phosphate synthase 2
3	33765926	33766235	310	33766066	22.8645	5.81456	19.9018	Os03g0807700	LOC_Os03g59300	AT3G08030.1		Protein of unknown function, DUF642
11	20188449	20188940	492	20188694	19.6011	5.80657	16.7271	Os11g0547000	LOC_Os11g34460	AT1G68050.1	ADO3,FKF1	flavin-binding, kelch repeat, f box 1
4	27248183	27248885	703	27248396	20.3936	5.80157	17.4965	Os04g0544100	LOC_Os04g45990	AT2G35160.1	SGD9,SUVH5	SU(VAR)3-9 homolog 5
3	13072534	13072846	313	13072679	19.9883	5.80111	17.103	Os03g0348200	LOC_Os03g22634	AT5G23960.2	ATTPS21,TPS21	terpene synthase 21
3	31564702	31565041	340	31564858	18.368	5.79856	15.5301	Os03g0763000	LOC_Os03g55490	AT2G23070.1		Protein kinase superfamily protein
4	9660938	9661727	790	9661541	21.9966	5.79753	19.0567	Os04g0249550	None
4	3633642	3634015	374	3633838	21.569	5.79042	18.6401	Os04g0153000	LOC_Os04g06900	AT5G45530.1		Protein of unknown function (DUF594)
2	5760668	5761183	516	5760998	20.5772	5.73256	17.6753	Os02g0202950	LOC_Os02g10860	AT5G11260.1	HY5,TED 5	Basic-leucine zipper (bZIP) transcription factor family protein
9	6036355	6036806	452	6036520	20.5772	5.73256	17.6753	Os09g0281850	None
9	15958977	15959368	392	15959186	18.9768	5.73183	16.12	Os09g0434500	LOC_Os09g26420	AT1G53910.2	RAP2.12	related to AP2 12
1	38237995	38238314	320	38238173	17.741	5.71769	14.9227	Os01g0881000	LOC_Os01g65850	AT2G25170.1	CHD3,CHR6,GYM,PKL,SSL2	chromatin remodeling factor CHD3 (PICKLE)
8	5549259	5549598	340	5549433	20.5073	5.71078	17.608	Os08g0195000	LOC_Os08g09590	AT4G05497.1		RNI-like superfamily protein
11	5084793	5085186	394	5084963	21.2743	5.7017	18.3531	Os11g0200950	LOC_Os11g09460
1	38444231	38444588	358	38444417	18.0015	5.66963	15.1748	Os01g0885000	LOC_Os01g66180	AT4G10040.1	CYTC-2	cytochrome c-2
6	5269446	5269725	280	5269590	15.6214	5.66314	12.8736	Os06g0204100	LOC_Os06g10260	AT5G07990.1	CYP75B1,D501,TT7	Cytochrome P450 superfamily protein
1	40961551	40961896	346	40961693	19.1568	5.65962	16.2955	Os01g0933950	None
7	22297038	22297338	301	22297183	19.1568	5.65962	16.2955	Os07g0558100	LOC_Os07g37210	AT4G21440.1	ATM4,ATMYB102,MYB102	MYB-like 102
1	13770432	13770784	353	13770586	17.1462	5.6456	14.3469	Os01g0346250	LOC_Os01g24420
7	29189004	29189458	455	29189191	17.1462	5.6456	14.3469	Os07g0686950	None
1	8168636	8169040	405	8168808	17.9117	5.63829	15.0885	Os01g0248400	LOC_Os01g14580	AT1G65930.1	cICDH	cytosolic NADP+-dependent isocitrate dehydrogenase
1	40672758	40673207	450	40672983	23.7964	5.63098	20.8089	Os01g0927300	LOC_Os01g70240	AT2G35730.1		Heavy metal transport/detoxification superfamily protein
6	2161648	2162007	360	2161821	16.7034	5.62698	13.9199	Os06g0141166	LOC_Os06g04910	AT5G20070.1	ATNUDT19,ATNUDX19,NUDX19	nudix hydrolase homolog 19
3	28974047	28974477	431	28974289	18.2653	5.62485	15.4317	Os03g0715500	LOC_Os03g50740	AT4G36630.1	EMB2754	Vacuolar sorting protein 39
3	878323	878645	323	878492	17.0859	5.62367	14.2889	Os03g0115500	LOC_Os03g02450	AT2G46580.1		Pyridoxamine 5\'-phosphate oxidase family protein
12	26136828	26137124	297	26136978	16.6429	5.60455	13.8605	Os12g0616150	None
5	2215853	2216246	394	2216062	16.6429	5.60455	13.8605	Os05g0138200	LOC_Os05g04690	AT1G02360.1		Chitinase family protein
8	277069	277375	307	277222	19.7549	5.59924	16.8757	Os08g0105000	LOC_Os08g01420	AT1G77250.1		RING/FYVE/PHD-type zinc finger family protein
3	9945468	9945807	340	9945645	17.7929	5.59704	14.9736	Os03g0287800	LOC_Os03g17850	AT2G37090.1	IRX9	Nucleotide-diphospho-sugar transferases superfamily protein
4	30281575	30281904	330	30281761	17.3795	5.58889	14.5724	Os04g0600000	LOC_Os04g51130	AT5G45580.1		Homeodomain-like superfamily protein
2	31162665	31163030	366	31162869	18.1476	5.58486	15.3163	Os02g0743400	LOC_Os02g50960	AT1G73590.1	ATPIN1,PIN1	Auxin efflux carrier family protein
3	11083779	11084575	797	11084431	17.3203	5.56798	14.5166	Os03g0310600	LOC_Os03g19700	AT3G50170.1		Plant protein of unknown function (DUF247)
1	31701197	31701687	491	31701406	22.3828	5.56741	19.4314	Os01g0755550	None
2	31596474	31596961	488	31596648	22.3828	5.56741	19.4314	Os02g0751800	LOC_Os02g51590	AT1G22170.1		Phosphoglycerate mutase family protein
9	10478650	10479058	409	10478844	20.3594	5.54546	17.4631	Os09g0341100	LOC_Os09g17110
9	22453962	22454289	328	22454113	20.3594	5.54546	17.4631	Os09g0564600	LOC_Os09g39110	AT5G50260.1		Cysteine proteinases superfamily protein
2	6578572	6578929	358	6578759	16.0795	5.53907	13.3161	Os02g0217600	LOC_Os02g12580	AT1G10430.1	PP2A-2	protein phosphatase 2A-2
2	17931492	17931841	350	17931680	18.3874	5.5351	15.549	Os02g0504500	LOC_Os02g30180	AT1G04850.1		ubiquitin-associated (UBA)/TS-N domain-containing protein
7	7254619	7254947	329	7254782	16.4338	5.52743	13.6591	Os07g0230400	LOC_Os07g12700
10	20753871	20754461	591	20754310	18.3359	5.51813	15.4991	Os10g0533600	LOC_Os10g38950	AT4G01370.1	ATMPK4,MPK4	MAP kinase 4
6	12339876	12340181	306	12340005	18.3359	5.51813	15.4991	Os06g0318533	LOC_Os06g21369
5	10231535	10231883	349	10231711	16.0199	5.51668	13.2589	Os05g0263100	LOC_Os05g17800	AT1G56130.1		Leucine-rich repeat transmembrane protein kinase
11	5025819	5026178	360	5025989	20.969	5.49725	18.0557	Os11g0199900	LOC_Os11g09360	AT3G28410.1		F-box/RNI-like superfamily protein
8	22926620	22927046	427	22926824	20.969	5.49725	18.0557	Os08g0466600	None
8	17715855	17716190	336	17716020	20.1766	5.49087	17.2862	Os08g0377150	None
5	3874817	3875122	306	3874959	16.3129	5.48315	13.5412	Os05g0165800	None
3	29011236	29011615	380	29011402	16.6722	5.47475	13.8895	Os03g0716900	None
10	1777689	1778147	459	1777897	18.9428	5.46593	16.0869	Os10g0128600	LOC_Os10g03910	AT5G38386.1		F-box/RNI-like superfamily protein
6	30054436	30055135	700	30054825	16.6433	5.46442	13.8608	Os06g0710700	LOC_Os06g49660	AT5G17540.1		HXXXD-type acyl-transferase family protein
1	18833744	18834107	364	18833913	15.8724	5.46148	13.1162	Os01g0525701	None
6	27293288	27293703	416	27293491	17.358	5.44757	14.5518	Os06g0662000	LOC_Os06g45120	AT1G78900.2	VHA-A	vacuolar ATP synthase subunit A
2	29340361	29340699	339	29340546	17.3296	5.43789	14.5251	Os02g0709400	LOC_Os02g47970	AT1G55350.3	ATDEK1,DEK1,EMB1275,EMB80	calpain-type cysteine protease family
6	2740450	2740833	384	2740613	17.3296	5.43789	14.5251	Os06g0153100	LOC_Os06g05970	AT5G49120.1		Protein of unknown function (DUF581)
4	14705459	14705749	291	14705608	16.9161	5.42641	14.1242	Os04g0320000	None
11	175973	176356	384	176175	19.1258	5.40439	16.2661	Os11g0104220	LOC_Os11g01320
2	1916858	1917153	296	1917001	17.5758	5.39317	14.7627	Os02g0136000	LOC_Os02g04340	AT1G64530.1	NLP6	Plant regulator RWP-RK family protein
5	21921565	21922073	509	21921800	16.0559	5.38969	13.293	Os05g0447000	LOC_Os05g37460
1	6002018	6003323	1306	6003146	16.8013	5.38665	14.0135	Os01g0210300	LOC_Os01g11210
3	15960681	15961089	409	15960894	16.0274	5.37938	13.2656	Os03g0395600	LOC_Os03g27820	AT3G50370.1
8	18184361	18184649	289	18184500	14.8968	5.37802	12.1743	Os08g0385650	None
1	21184180	21184490	311	21184333	16.7732	5.37692	13.987	Os01g0559300	LOC_Os01g37850	AT4G26240.1
3	8920681	8921000	320	8920819	15.254	5.37122	12.5185	Os03g0268750	None
12	4197844	4198145	302	4197983	14.8677	5.36676	12.147	Os12g0182800	LOC_Os12g08230	AT1G48170.1
7	4321260	4321607	348	4321454	16.7171	5.35757	13.9335	Os07g0181800	LOC_Os07g08410	AT4G14615.1
7	19381578	19381893	316	19381743	15.9423	5.34868	13.1834	Os07g0509200	LOC_Os07g32530	AT5G09400.1	KUP7	K+ uptake permease 7
3	27333701	27334152	452	27333961	16.6892	5.34795	13.9062	Os03g0685300	LOC_Os03g48060	AT4G30550.1		Class I glutamine amidotransferase-like superfamily protein
1	38426051	38426429	379	38426256	23.4458	5.34578	20.4672	Os01g0884500	LOC_Os01g66140	AT2G16485.1		nucleic acid binding;zinc ion binding;DNA binding
10	20201771	20202087	317	20201921	14.8098	5.34438	12.0899	Os10g0521700	LOC_Os10g37740	AT4G00720.1	ASKTHETA,ATSK32,SK32	shaggy-like protein kinase 32
8	14413290	14413679	390	14413462	15.555	5.34384	12.809	Os08g0327400	LOC_Os08g23810	AT2G05990.2	ENR1,MOD1	NAD(P)-binding Rossmann-fold superfamily protein
12	20901016	20901343	328	20901171	15.914	5.33853	13.1572	Os12g0530100	LOC_Os12g34524	AT2G39040.1		Peroxidase superfamily protein
5	23085219	23085569	351	23085377	15.5267	5.3334	12.7813	Os05g0470000	LOC_Os05g39350	AT3G55990.1	ESK1,TBL29	Plant protein of unknown function (DUF828)
2	924370	924657	288	924507	18.1411	5.33261	15.3104	Os02g0117550	None
9	3088869	3089182	314	3089032	12.5415	5.32598	9.90718	Os09g0240500	LOC_Os09g06499	AT5G13550.1	SULTR4;1	sulfate transporter 4.1
2	34491544	34491931	388	34491723	15.4984	5.323	12.7539	Os02g0807600	None
2	24652468	24652823	356	24652648	15.4953	5.32188	12.7515	Os02g0619600	LOC_Os02g40664	AT5G60710.1		Zinc finger (C3HC4-type RING finger) family protein
7	24445171	24445604	434	24445351	15.4953	5.32188	12.7515	Os07g0598900	LOC_Os07g40790	AT1G26520.1		Cobalamin biosynthesis CobW-like protein
3	4258728	4259130	403	4258914	18.7608	5.29339	15.9113	Os03g0181400	LOC_Os03g08350	AT5G21970.1		Ubiquitin carboxyl-terminal hydrolase family protein
12	5132274	5132564	291	5132437	15.3859	5.28179	12.6465	Os12g0199050	None
10	19014515	19014884	370	19014732	15.7463	5.2784	12.9938	Os10g0498600	LOC_Os10g35550	AT4G03430.1	EMB2770,STA1	pre-mRNA splicing factor-related
12	12315102	12315423	322	12315271	16.1085	5.27568	13.3433	Os12g0407200	LOC_Os12g21870	AT1G30010.1		Intron maturase, type II family protein
12	24477993	24478397	405	24478203	16.1085	5.27568	13.3433	Os12g0586400	LOC_Os12g39650	AT4G37190.1
2	22322991	22323404	414	22323184	16.1085	5.27568	13.3433	Os02g0580000	LOC_Os02g36950	AT5G35525.1		PLAC8 family protein
6	27970565	27970965	401	27970768	16.1085	5.27568	13.3433	Os06g0674000	None
8	26500656	26501013	358	26500830	22.0423	5.27512	19.0998	Os08g0531600	LOC_Os08g41940	AT5G50670.1		Squamosa promoter-binding protein-like (SBP domain) transcription factor family protein
6	15351677	15352062	386	15351857	15.358	5.27159	12.6192	Os06g0367100	LOC_Os06g26234	AT3G20440.2	BE1,EMB2729	Alpha amylase family protein
2	12604775	12605141	367	12604940	16.0796	5.2656	13.3161	Os02g0317300	LOC_Os02g21240	AT4G05460.1		RNI-like superfamily protein
8	25410785	25411235	451	25410940	14.9698	5.26438	12.2438	Os08g0512400	LOC_Os08g40150	AT2G33620.2		AT hook motif DNA-binding family protein
3	23349413	23350095	683	23349938	19.3842	5.25824	16.5163	Os03g0616450	LOC_Os03g42030
4	5600857	5601169	313	5601004	16.4136	5.25358	13.6392	Os04g0182300	LOC_Os04g10360	AT3G14067.1		Subtilase family protein
6	9372429	9372708	280	9372576	15.9975	5.23702	13.2369	Os06g0275700	LOC_Os06g16410	AT1G68940.1		Armadillo/beta-catenin-like repeat family protein
1	7196004	7196374	371	7196149	16.727	5.23515	13.9419	Os01g0229900	LOC_Os01g12950	AT3G15355.1	PFU1,UBC25	ubiquitin-conjugating enzyme 25
11	13710783	13711120	338	13710990	16.727	5.23515	13.9419	Os11g0428500	LOC_Os11g24120
3	11589085	11589488	404	11589308	16.727	5.23515	13.9419	Os03g0320850	None
4	24276902	24277227	326	24277083	16.727	5.23515	13.9419	Os04g0485700	LOC_Os04g40900	AT1G67660.1		Restriction endonuclease, type II-like superfamily protein
5	15881738	15882037	300	15881886	16.727	5.23515	13.9419	Os05g0339000	LOC_Os05g27320	AT2G38410.1		ENTH/VHS/GAT family protein
8	21055973	21056450	478	21056268	16.7265	5.23498	14.5216	Os08g0434300	LOC_Os08g33720	AT3G47520.1	MDH	malate dehydrogenase
2	15004395	15004756	362	15004547	20.0106	5.22655	17.1247	Os02g0453800	LOC_Os02g25650
12	13406301	13406612	312	13406457	14.8583	5.22282	12.1377	Os12g0424180	LOC_Os12g23610	ATMG00410.1		ATPase subunit 6-1
11	21870138	21870470	333	21870318	15.2196	5.22116	12.4849	Os11g0579200	LOC_Os11g37050	AT3G46730.1		NB-ARC domain-containing disease resistance protein
3	5805941	5806254	314	5806079	15.2196	5.22116	12.4849	Os03g0211400	LOC_Os03g11290	AT5G39380.1		Plant calmodulin-binding protein-related
3	14572153	14572483	331	14572331	15.5812	5.2196	12.8348	Os03g0371400	None
8	23031138	23031683	546	23031340	13.749	5.2171	11.0672	Os08g0468100	LOC_Os08g36480	AT1G77760.1	GNR1,NIA1,NR1	nitrate reductase 1
12	3455131	3455480	350	3455312	17.0304	5.21421	14.2353	Os12g0168200	LOC_Os12g07050	AT1G73820.1		Ssu72-like family protein
4	32138816	32139132	317	32138983	14.4418	5.20337	11.7346	Os04g0631100	LOC_Os04g53930	AT3G20660.1	4-Oct,AtOCT4	organic cation/carnitine transporter4
4	14674639	14674975	337	14674816	17.35	5.1993	14.5439	Os04g0319600	LOC_Os04g25360	AT5G14600.1		S-adenosyl-L-methionine-dependent methyltransferases superfamily protein
1	7339793	7340177	385	7340004	16.2247	5.18947	13.4572	Os01g0232500	LOC_Os01g13170	AT1G53025.1		Ubiquitin-conjugating enzyme family protein
6	20168211	20168598	388	20168403	18.3271	5.16337	15.4918	Os06g0538200	LOC_Os06g34710	AT3G58110.1
3	29082720	29083004	285	29082854	14.6935	5.1617	11.9777	Os03g0718300	None
6	4439431	4439774	344	4439595	14.6935	5.1617	11.9777	Os06g0188000	LOC_Os06g08850	AT4G30360.1	ATCNGC17,CNGC17	cyclic nucleotide-gated channel 17
4	34837912	34838335	424	34838132	14.6662	5.15165	11.953	Os04g0682400	LOC_Os04g58590	AT1G49760.1	PAB8,PABP8	poly(A) binding protein 8
1	37503267	37503622	356	37503443	18.6062	5.13873	15.7611	Os01g0866000	LOC_Os01g64620	AT3G10910.1		RING/U-box superfamily protein
4	30008722	30009024	303	30008883	15.313	5.12495	12.5748	Os04g0593600	LOC_Os04g50720	AT1G32340.1	NHL8	NDR1/HIN1-like 8
9	21607660	21607939	280	21607791	15.313	5.12495	12.5748	Os09g0547033	LOC_Os09g37495	AT5G27780.1		SAUR-like auxin-responsive protein family
5	23007063	23007432	370	23007257	14.9482	5.12315	12.223	Os05g0468550	None
7	949820	950175	356	949988	14.9482	5.12315	12.223	Os07g0117350	LOC_Os07g02624	AT3G14470.1		NB-ARC domain-containing disease resistance protein
7	16212113	16212427	315	16212278	12.774	5.11312	10.1313	Os07g0461900	LOC_Os07g27780	AT1G80600.1	WIN1	HOPW1-1-interacting 1
4	14972341	14972648	308	14972507	11.7082	5.11294	9.1068	Os04g0324000	None
6	6840669	6841041	373	6840853	14.195	5.11003	11.4975	Os06g0232200	LOC_Os06g12600	AT1G66430.1		pfkB-like carbohydrate kinase family protein
6	5599855	5600806	952	5600041	14.5313	5.10199	11.8203	Os06g0209700	LOC_Os06g10730
2	5414020	5414394	375	5414208	14.168	5.09986	11.4714	Os02g0196750	None
4	27213276	27213594	319	27213430	15.2321	5.09661	12.497	Os04g0543650	None
8	25601698	25602134	437	25601939	15.9397	5.09366	13.1809	Os08g0516200	LOC_Os08g40460	AT5G19000.1	ATBPM1,BPM1	BTB-POZ and MATH domain 1
8	2006099	2006430	332	2006247	15.1794	5.0782	12.4465	Os08g0135400	LOC_Os08g04130	AT1G79380.1		Ca(2)-dependent phospholipid-binding protein (Copine) family
3	23350398	23350854	457	23350637	16.2469	5.07699	13.4782	Os03g0616450	LOC_Os03g42030
7	16966650	16967003	354	16966834	14.4512	5.07265	11.7435	Os07g0472400	LOC_Os07g28930	AT4G35500.1		Protein kinase superfamily protein
1	12563511	12563859	349	12563681	15.1532	5.06905	12.422	Os01g0327100	LOC_Os01g22352	AT2G18150.1		Peroxidase superfamily protein
4	31528387	31528776	390	31528632	17.2907	5.06818	14.4878	Os04g0620132	None
1	27735585	27735956	372	27735755	14.7888	5.06609	12.0699	Os01g0674800	LOC_Os01g48390	AT4G18640.1	MRH1	Leucine-rich repeat protein kinase family protein
11	3650512	3650919	408	3650696	16.5698	5.06598	13.7889	Os11g0173750	LOC_Os11g07250	AT3G47580.1		Leucine-rich repeat protein kinase family protein
5	3238758	3239131	374	3238913	14.4246	5.06294	11.7182	Os05g0155200	LOC_Os05g06320
6	830881	831237	357	831020	14.4246	5.06294	11.7182	Os06g0114400	LOC_Os06g02410
10	19278591	19278913	323	19278769	13.3604	5.06291	10.6953	Os10g0504600	LOC_Os10g36060	AT1G63300.1		Myosin heavy chain-related protein
4	25904096	25904429	334	25904291	15.4656	5.05413	12.7238	Os04g0518000	LOC_Os04g43750	AT5G03300.1	ADK2	adenosine kinase 2
8	4719856	4720179	324	4720037	14.3981	5.05328	11.694	Os08g0180950	None
4	23297351	23297730	380	23297557	14.034	5.04964	11.3431	Os04g0465900	LOC_Os04g39180	AT3G59110.1		Protein kinase superfamily protein
12	3540751	3541074	324	3540899	16.5094	5.04673	13.7319	Os12g0169600	LOC_Os12g07210
1	30673639	30674054	416	30673827	17.2028	5.04133	14.4018	Os01g0735500	LOC_Os01g53390	AT3G16520.3	UGT88A1	UDP-glucosyl transferase 88A1
12	19166226	19166585	360	19166396	17.2028	5.04133	14.4018	Os12g0502800	LOC_Os12g31850	AT2G03530.1	ATUPS2,UPS2	ureide permease 2
2	22574065	22574363	299	22574215	12.9428	5.0372	10.291	Os02g0585700	LOC_Os02g37360
10	21188866	21189203	338	21189044	14.3454	5.03405	11.6422	Os10g0542700	LOC_Os10g39660	AT1G76240.1		Arabidopsis protein of unknown function (DUF241)
12	12914266	12914598	333	12914427	13.2721	5.02825	10.6091	Os12g0417450	None
3	10420233	10420517	285	10420381	13.2721	5.02825	10.6091	Os03g0297600	LOC_Os03g18600	AT5G05440.1	PYL5,RCAR8	Polyketide cyclase/dehydrase and lipid transport superfamily protein
7	20124907	20125342	436	20125061	13.2721	5.02825	10.6091	Os07g0521000	LOC_Os07g33680	AT4G32210.1	SDH3-2	succinate dehydrogenase 3-2
9	11435217	11435557	341	11435369	13.6165	5.02532	10.9405	Os09g0356000	LOC_Os09g19140	AT1G51800.1		Leucine-rich repeat protein kinase family protein
12	5018085	5018490	406	5018251	15.7277	5.02312	12.9765	Os12g0197100	LOC_Os12g09540	AT1G09830.1		Glycinamide ribonucleotide (GAR) synthetase
7	27711271	27711621	351	27711434	15.7277	5.02312	12.9765	Os07g0658200	LOC_Os07g46440	AT3G49080.1		Ribosomal protein S5 domain 2-like superfamily protein
2	13302718	13303115	398	13302906	17.838	5.01923	15.0168	Os02g0328550	None
6	20871354	20871709	356	20871528	14.2929	5.01497	11.5918	Os06g0550800	LOC_Os06g35770	AT2G42760.1
2	33004764	33005322	559	33005146	13.5634	5.00505	10.8885	Os02g0779650	None
1	3479093	3479560	468	3479300	14.6059	5.0011	11.8937	Os01g0168000	LOC_Os01g07364
10	22555937	22556276	340	22556128	18.4752	4.99931	15.6346	Os10g0568900	LOC_Os10g41930	AT2G38740.1		Haloacid dehalogenase-like hydrolase (HAD) superfamily protein
8	97495	98087	593	97868	14.2407	4.99604	11.5411	Os08g0101700	LOC_Os08g01140	AT4G25570.1	ACYB-2	Cytochrome b561/ferric reductase transmembrane protein family
6	4499396	4499729	334	4499533	15.9917	4.99413	13.2316	Os06g0188950	None
7	6236590	6236991	402	6236804	13.8494	4.98096	11.1644	Os07g0213500	LOC_Os07g11300
3	31343002	31343284	283	31343153	14.5299	4.97421	11.8191	Os03g0758300	LOC_Os03g55100	AT5G15410.1	ATCNGC2,CNGC2,DND1	Cyclic nucleotide-regulated ion channel family protein
4	27787653	27788164	512	27787837	14.5299	4.97421	11.8191	Os04g0555300	LOC_Os04g46880	AT3G47420.1	ATPS3,PS3	phosphate starvation-induced gene 3
9	21548682	21548992	311	21548859	14.5299	4.97421	11.8191	Os09g0545000	LOC_Os09g37300	AT1G79400.1	ATCHX2,CHX2	cation/H+ exchanger 2
1	644611	644994	384	644835	14.5286	4.97376	11.8191	Os01g0112300	LOC_Os01g02180	AT1G24265.3		Protein of unknown function (DUF1664)
7	28498912	28499256	345	28499050	14.5286	4.97376	11.8191	Os07g0674150	None
1	32503291	32503621	331	32503459	13.8233	4.9713	11.1387	Os01g0770200	LOC_Os01g56380	AT2G20340.1		Pyridoxal phosphate (PLP)-dependent transferases superfamily protein
2	23227350	23227632	283	23227510	14.1629	4.9679	11.4669	Os02g0597700	LOC_Os02g38410	AT5G14360.1		Ubiquitin-like superfamily protein
5	16889397	16889712	316	16889560	17.3069	4.96661	14.5033	Os05g0356600	LOC_Os05g28820
3	12905642	12906047	406	12905895	19.7541	4.96482	16.8757	Os03g0345901	None
1	26388231	26388615	385	26388401	12.7543	4.96165	10.1127	Os01g0652300	LOC_Os01g46370
11	3847579	3847866	288	3847720	13.4319	4.95507	10.7628	Os11g0177301	None
1	7931452	7931776	325	7931613	15.164	4.95217	12.4314	Os01g0243700	LOC_Os01g14140	AT1G78520.1		Carbohydrate-binding X8 domain superfamily protein
1	41307745	41308197	453	41308029	15.164	4.95217	12.4314	Os01g0940100	LOC_Os01g71320	AT1G50460.1	ATHKL1,HKL1	hexokinase-like 1
4	5864148	5864639	492	5864295	15.164	4.95217	12.4314	Os04g0186800	LOC_Os04g10800	AT2G32830.1	PHT1;5,PHT5	phosphate transporter 1;5
12	8077995	8078316	322	8078131	13.7714	4.9521	11.0879	Os12g0245800	LOC_Os12g14224
2	30679899	30680343	445	30680075	13.7714	4.9521	11.0879	Os02g0735200	LOC_Os02g50240	AT5G37600.1	ATGLN1;1,ATGSR1,GLN1;1,GSR 1	glutamine synthase clone R1
4	33384529	33384848	320	33384687	13.7714	4.9521	11.0879	Os04g0654600	LOC_Os04g56060	AT2G18890.1		Protein kinase superfamily protein
4	10318951	10319375	425	10319124	13.7456	4.94255	11.0639	Os04g0257500	LOC_Os04g18650	AT3G23230.1		Integrase-type DNA-binding superfamily protein
12	5072501	5072894	394	5072750	15.1336	4.94195	12.4033	Os12g0198000	LOC_Os12g09620	AT1G02816.1		Protein of unknown function, DUF538
2	32355508	32355948	441	32355756	15.4749	4.93977	12.7322	Os02g0768200	LOC_Os02g52920	AT1G09580.1		emp24/gp25L/p24 family/GOLD family protein
6	798943	799289	347	799118	15.4749	4.93977	12.7322	Os06g0113900	LOC_Os06g02370
1	4666928	4667277	350	4667126	13.6941	4.92357	11.0138	Os01g0187300	None
6	16795853	16796213	361	16796038	12.6485	4.91948	10.0111	Os06g0488600	LOC_Os06g29380	AT1G68710.1		ATPase E1-E2 type family protein / haloacid dehalogenase-like hydrolase family protein
2	24649969	24650360	392	24650167	12.988	4.91757	10.3349	Os02g0619801	None
1	41510201	41510480	280	41510344	13.328	4.91579	10.6636	Os01g0944200	LOC_Os01g71630
11	27494884	27495233	350	27495097	16.4395	4.91529	13.6638	Os11g0679900	LOC_Os11g45410	AT1G16480.2		Tetratricopeptide repeat (TPR)-like superfamily protein
7	27232670	27233142	473	27232903	16.4395	4.91529	13.6638	Os07g0652900	LOC_Os07g45620
4	5846759	5847096	338	5846933	14.7031	4.91357	12.5441	Os04g0186400	LOC_Os04g10750	AT2G32830.1	PHT1;5,PHT5	phosphate transporter 1;5
6	11461154	11461452	299	11461295	14.6918	4.90973	11.9766	Os06g0303800	LOC_Os06g19990	AT4G28280.2	LLG3	LORELEI-LIKE-GPI ANCHORED PROTEIN 3
5	21756855	21757284	430	21757106	12.9619	4.90751	10.3093	Os05g0444500	LOC_Os05g37210	AT3G59310.2		Eukaryotic protein of unknown function (DUF914)
9	2319943	2320333	391	2320097	12.596	4.89867	9.96037	Os09g0130300	LOC_Os09g04384
4	19377153	19377467	315	19377303	13.6173	4.89536	10.9412	Os04g0394200	LOC_Os04g32330	AT4G26910.1		Dihydrolipoamide succinyltransferase
7	2805075	2805589	515	2805388	12.5439	4.87803	9.90953	Os07g0153000	LOC_Os07g05830	AT1G48500.1	JAZ4,TIFY6A	jasmonate-zim-domain protein 4
9	14393031	14393376	346	14393200	13.9081	4.87636	11.2205	Os09g0407800	LOC_Os09g24240	AT4G02750.1		Tetratricopeptide repeat (TPR)-like superfamily protein
5	5813015	5813396	382	5813182	14.9098	4.86716	12.1872	Os05g0194900	LOC_Os05g10650	AT4G26270.1	PFK3	phosphofructokinase 3
3	14443577	14443860	284	14443710	11.8116	4.85702	9.20717	Os03g0368300	LOC_Os03g25300	AT4G11290.1		Peroxidase superfamily protein
9	12546978	12547329	352	12547178	14.1753	4.85001	11.4783	Os09g0375100	LOC_Os09g20830
7	29233506	29233932	427	29233702	13.833	4.84955	11.1482	Os07g0688100	LOC_Os07g48850	AT1G13040.1		Pentatricopeptide repeat (PPR-like) superfamily protein
2	33004764	33005322	559	33004956	12.782	4.83821	10.139	Os02g0779650	None
2	23605075	23605377	303	23605244	13.4407	4.83079	10.7714	Os02g0602900	LOC_Os02g39080
9	22348003	22348383	381	22348199	13.0985	4.82967	10.4416	Os09g0562600	LOC_Os09g38910	AT1G21240.1	WAK3	wall associated kinase 3
8	3513614	3514044	431	3513825	12.7566	4.82847	10.1149	Os08g0159800	LOC_Os08g06330	AT1G32360.1		Zinc finger (CCCH-type) family protein
7	15072791	15073113	323	15072992	13.3909	4.81265	10.7242	Os07g0444000	LOC_Os07g26210	AT3G24180.2		Beta-glucosidase, GBA2 type family protein
3	23491058	23491453	396	23491267	14.4005	4.81067	11.695	Os03g0619501	None
2	28360912	28361317	406	28361132	12.3639	4.80714	9.73475	Os02g0690800	LOC_Os02g46520	AT4G17830.1		Peptidase M20/M25/M40 family protein
1	23008983	23009314	332	23009156	13.366	4.80364	10.7008	Os01g0589900	LOC_Os01g40720	AT5G09950.1		Tetratricopeptide repeat (TPR)-like superfamily protein
4	8113595	8113897	303	8113729	15.0432	4.79935	12.3144	Os04g0221450	None
5	1863277	1863621	345	1863457	15.0432	4.79935	12.3144	Os05g0132000	LOC_Os05g04160	AT3G48810.1		Pentatricopeptide repeat (PPR) superfamily protein
4	27565731	27566012	282	27565861	14.6906	4.7946	11.9759	Os04g0550600	LOC_Os04g46470	AT2G44990.1	ATCCD7,CCD7,MAX3	carotenoid cleavage dioxygenase 7
4	19373271	19373605	335	19373455	13.6599	4.78813	10.9806	Os04g0394100	LOC_Os04g32320	AT5G41080.1		PLC-like phosphodiesterases superfamily protein
12	9271966	9272351	386	9272100	13.6354	4.77949	10.9592	Os12g0263050	None
6	15234590	15235000	411	15234775	11.288	4.77814	8.70886	Os06g0365200	None
5	29355210	29355514	305	29355350	12.6056	4.77084	9.9695	Os05g0589600	LOC_Os05g51180	AT4G17520.1		Hyaluronan / mRNA binding family
11	5664235	5664625	391	5664435	17.6252	4.76468	14.8106	Os11g0209700	LOC_Os11g10420	AT5G64070.1	PI-4KBETA1,PI4KBETA1	phosphatidylinositol 4-OH kinase beta1
1	16514700	16515011	312	16514849	12.8747	4.74651	10.2264	Os01g0390900	LOC_Os01g29469	AT3G23610.3	DSPTP1	dual specificity protein phosphatase 1
1	40950045	40950398	354	40950214	12.8747	4.74651	10.2264	Os01g0933600	LOC_Os01g70740
3	22266843	22267189	347	22266991	12.8747	4.74651	10.2264	Os03g0597800	None
3	22918477	22918797	321	22918649	14.4759	4.72417	11.7678	Os03g0608700	LOC_Os03g41200	AT4G02550.4
7	21119914	21120196	283	21120047	14.4759	4.72417	11.7678	Os07g0537300	LOC_Os07g35290	AT4G23180.1	CRK10,RLK4	cysteine-rich RLK (RECEPTOR-like protein kinase) 10
6	30059059	30059347	289	30059194	13.1455	4.72398	10.486	Os06g0710800	LOC_Os06g49670	AT5G42310.1		Pentatricopeptide repeat (PPR-like) superfamily protein
6	21828176	21828745	570	21828404	12.138	4.71898	9.51972	Os06g0566201	None
8	3279371	3279695	325	3279547	12.138	4.71898	9.51972	Os08g0156600	LOC_Os08g06010	AT3G47420.1	ATPS3,PS3	phosphate starvation-induced gene 3
5	24243338	24243633	296	24243476	13.4179	4.70304	10.7491	Os05g0493400	None
11	2382088	2382373	286	2382232	12.0886	4.69982	9.47426	Os11g0151200	None
11	26295372	26295726	355	26295532	13.6916	4.68354	11.0115	Os11g0656601	None
4	29529020	29529320	301	29529179	12.3597	4.67779	9.73063	Os04g0584550	None
2	23263727	23264022	296	23263865	11.376	4.6774	8.79433	Os02g0598200	LOC_Os02g38470	AT3G18960.1		AP2/B3-like transcriptional factor family protein
12	282595	282960	366	282777	12.3571	4.67681	9.72846	Os12g0105300	LOC_Os12g01449	AT3G25690.3	CHUP1	Hydroxyproline-rich glycoprotein family protein
4	23277461	23277835	375	23277596	12.3571	4.67681	9.72846	Os04g0465500	LOC_Os04g39140	AT1G24040.1		Acyl-CoA N-acyltransferases (NAT) superfamily protein
6	30775345	30775685	341	30775524	15.3025	4.67162	12.5661	Os06g0724300	LOC_Os06g50860	AT4G38500.1		Protein of unknown function (DUF616)
5	13740509	13740932	424	13740674	13.3228	4.66985	10.6585	Os05g0304701	None
4	20021754	20022054	301	20021895	14.2973	4.66603	11.5949	Os04g0403600	LOC_Os04g33070
6	1094877	1095265	389	1095099	14.2973	4.66603	11.5949	Os06g0120466	None
8	2913752	2914033	282	2913888	14.2973	4.66603	11.5949	Os08g0150600	LOC_Os08g05470
2	23611328	23611719	392	23611532	14.946	4.66323	12.2213	Os02g0603000	LOC_Os02g39090	AT4G13000.1		AGC (cAMP-dependent, cGMP-dependent and protein kinase C) kinase family protein
3	35188668	35188996	329	35188829	14.946	4.66323	12.2213	Os03g0837300	LOC_Os03g62110
7	15725369	15725671	303	15725508	14.946	4.66323	12.2213	Os07g0454200	LOC_Os07g27120
1	41524009	41524352	344	41524190	15.5953	4.66071	12.848	Os01g0944500	LOC_Os01g71650	AT3G57240.1	BG3	beta-1,3-glucanase 3
7	27699238	27699601	364	27699431	15.5953	4.66071	12.848	Os07g0657950	None
2	32955938	32956251	314	32956075	12.3113	4.65961	9.68505	Os02g0778500	LOC_Os02g53810	AT2G26310.1		Chalcone-flavanone isomerase family protein
12	24877668	24877987	320	24877841	14.2657	4.65579	11.5651	Os12g0593000	LOC_Os12g40190	AT2G23460.1	ATXLG1,XLG1	extra-large G-protein 1
2	16067743	16068039	297	16067897	11.6216	4.6451	9.02288	Os02g0472200	LOC_Os02g27280
3	5398122	5398775	654	5398452	11.6216	4.6451	9.02288	Os03g0203000	LOC_Os03g10590	AT3G19650.1		cyclin-related
3	12871128	12871432	305	12871274	13.2053	4.629	10.544	Os03g0345100	LOC_Os03g22450	AT3G05480.1	ATRAD9,RAD9	cell cycle checkpoint control protein family
4	18065408	18065705	298	18065583	13.1819	4.62092	10.5211	Os04g0371100	LOC_Os04g30260	AT1G21270.1	WAK2	wall-associated kinase 2
10	19237417	19237761	345	19237584	11.8699	4.61551	9.26351	Os10g0503700	LOC_Os10g35990	AT4G00660.2	ATRH8,RH8	RNAhelicase-like 8
2	32323638	32324096	459	32323894	11.2034	4.60724	8.62628	Os02g0767500	LOC_Os02g52860	AT5G14040.1	PHT3;1	phosphate transporter 3;1
1	37526771	37527058	288	37526906	12.4901	4.60553	9.85748	Os01g0866600	LOC_Os01g64680	AT5G09830.1		BolA-like family protein
1	42569566	42570033	468	42569831	13.4585	4.60452	10.7878	Os01g0965300	None
2	3771397	3771719	323	3771563	15.076	4.6032	12.3466	Os02g0169700	LOC_Os02g07330
5	22220700	22221086	387	22220870	11.8221	4.59718	9.21714	Os05g0452900	LOC_Os05g37910	AT3G54020.1	AtIPCS1	Arabidopsis Inositol phosphorylceramide synthase 1
6	27682825	27683152	328	27682983	12.7893	4.59692	10.1463	Os06g0668300	LOC_Os06g45720	AT5G19000.1	ATBPM1,BPM1	BTB-POZ and MATH domain 1
9	15407360	15407771	412	15407508	13.4355	4.59677	10.7664	Os09g0424650	None
3	30118140	30118460	321	30118305	13.736	4.5892	11.0546	Os03g0735200	LOC_Os03g52475	AT3G28660.1		Tetratricopeptide repeat (TPR)-like superfamily protein
11	11049437	11049980	544	11049749	11.7982	4.58807	9.19395	Os11g0298833	None
10	17484639	17485024	386	17484852	13.3896	4.58134	10.7237	Os10g0471350	LOC_Os10g33275	AT2G35920.1		RNA helicase family protein
1	8893877	8894325	449	8894075	12.097	4.57953	9.48243	Os01g0262600	LOC_Os01g15780	AT1G19710.1		UDP-Glycosyltransferase superfamily protein
2	23997891	23998192	302	23998038	14.0144	4.57484	11.3239	Os02g0610600	LOC_Os02g39720
9	19960225	19960657	433	19960427	12.0501	4.56211	9.439	Os09g0513000	LOC_Os09g33810	AT2G17390.1	AKR2B	ankyrin repeat-containing 2B
2	26214628	26214919	292	26214766	12.6736	4.55607	10.0352	Os02g0650500	LOC_Os02g43430	AT5G47070.1		Protein kinase superfamily protein
6	7156038	7156581	544	7156343	12.3501	4.5548	9.72268	Os06g0237502	LOC_Os06g13050	AT1G10510.1	emb2004	RNI-like superfamily protein
10	21762757	21763130	374	21762942	16.8282	4.55109	14.0397	Os10g0554200	LOC_Os10g40600	AT1G12110.1	ATNRT1,B-1,CHL1,CHL1-1,NRT1,NRT1.1	nitrate transporter 1.1
1	24300939	24301325	387	24301148	16.1751	4.5481	13.4082	Os01g0612750	None
3	30582783	30583166	384	30582949	16.1751	4.5481	13.4082	Os03g0744675	LOC_Os03g53280	AT1G03060.1	SPI	Beige/BEACH domain ;WD domain, G-beta repeat protein
3	5589343	5589627	285	5589487	12.327	4.54646	9.70039	Os03g0206750	None
9	14964692	14965055	364	14964842	12.9518	4.54162	10.2993	Os09g0417400	LOC_Os09g25040	AT2G24260.1	LRL1	LJRHL1-like 1
6	25714536	25714843	308	25714714	14.8691	4.54121	12.1474	Os06g0634100	LOC_Os06g42770	AT1G74350.1		Intron maturase, type II family protein
5	26910988	26911296	309	26911125	14.2162	4.53719	11.517	Os05g0542100	LOC_Os05g46450	AT2G46540.1
4	31474022	31474362	341	31474198	13.5635	4.53272	10.8885	Os04g0619500	LOC_Os04g52850	AT3G62940.2		Cysteine proteinases superfamily protein
6	19525016	19525412	397	19525173	13.5635	4.53272	10.8885	Os06g0526600	LOC_Os06g33520	AT5G63630.1		P-loop containing nucleoside triphosphate hydrolases superfamily protein
2	31539617	31539975	359	31539789	12.9111	4.52769	10.2599	Os02g0750600	LOC_Os02g51500	AT1G22050.1	MUB6	membrane-anchored ubiquitin-fold protein 6 precursor
3	7052654	7053251	598	7052808	12.9111	4.52769	10.2599	Os03g0232900	LOC_Os03g13040	AT4G37680.2	HHP4	heptahelical protein 4
3	35151495	35151908	414	35151759	12.9111	4.52769	10.2599	Os03g0836600	LOC_Os03g62040
6	25744885	25745206	322	25745022	12.9111	4.52769	10.2599	Os06g0634700	LOC_Os06g42824
6	25879592	25879926	335	25879765	12.9111	4.52769	10.2599	Os06g0636800	LOC_Os06g43060
10	12071298	12071697	400	12071463	12.2591	4.52201	9.6341	Os10g0377800	LOC_Os10g23120	AT5G49970.1	ATPPOX,PDX3,PPOX	pyridoxin (pyrodoxamine) 5\'-phosphate oxidase
10	22313934	22314359	426	22314176	12.2591	4.52201	9.6341	Os10g0565000	LOC_Os10g41534
5	4101761	4102106	346	4101931	12.2591	4.52201	9.6341	Os05g0168300	LOC_Os05g07632	AT3G10970.1		Haloacid dehalogenase-like hydrolase (HAD) superfamily protein
1	3497372	3497674	303	3497549	11.8879	4.50216	9.28066	Os01g0168300	LOC_Os01g07382	AT3G56430.1
4	25109918	25110252	335	25110079	12.5141	4.50009	9.88063	Os04g0502900	LOC_Os04g42430	AT4G32060.1		calcium-binding EF hand family protein
1	27693429	27693725	297	27693583	11.1934	4.47744	8.61671	Os01g0674000	LOC_Os01g48320	AT3G14180.1		sequence-specific DNA binding transcription factors
4	6894660	6894970	311	6894789	9.31616	4.47382	6.8332	Os04g0201000	LOC_Os04g12460	AT4G26090.1	RPS2	NB-ARC domain-containing disease resistance protein
10	19670470	19670773	304	19670609	12.3351	4.43777	9.70854	Os10g0511200	LOC_Os10g36740	AT1G64940.1	CYP89A6	cytochrome P450, family 87, subfamily A, polypeptide 6
1	26289210	26289653	444	26289360	12.0095	4.43273	9.39911	Os01g0650950	None
1	4521219	4521538	320	4521387	14.8097	4.4312	12.0899	Os01g0185200	LOC_Os01g09000	AT1G25350.1	OVA9	glutamine-tRNA ligase, putative / glutaminyl-tRNA synthetase, putative / GlnRS, putative
6	1210694	1211419	726	1210961	14.8097	4.4312	12.0899	Os06g0122800	LOC_Os06g03165
1	14075754	14076094	341	14075916	11.3809	4.43008	8.79853	Os01g0351800	LOC_Os01g24980	AT1G17010.1		2-oxoglutarate (2OG) and Fe(II)-dependent oxygenase superfamily protein
10	5467732	5468222	491	5468008	11.6839	4.42736	9.08348	Os10g0179200	LOC_Os10g10040	AT1G12740.2	CYP87A2	cytochrome P450, family 87, subfamily A, polypeptide 2
3	34193651	34193929	279	34193786	14.154	4.4217	11.4585	Os03g0815800	LOC_Os03g60120	AT4G27950.1	CRF4	cytokinin response factor 4
11	23435629	23435926	298	23435785	11.3584	4.42162	8.77688	Os11g0607200	LOC_Os11g39370	AT5G10290.1		leucine-rich repeat transmembrane protein kinase family protein
8	20789953	20790291	339	20790095	11.3584	4.42162	8.77688	Os08g0430100	LOC_Os08g33330	AT1G55170.1
11	1332744	1333117	374	1332944	11.6615	4.4192	9.06171	Os11g0128932	None
5	26128428	26128768	341	26128601	11.6615	4.4192	9.06171	Os05g0524575	None
8	1088768	1089138	371	1088956	11.6615	4.4192	9.06171	Os08g0119900	None
1	23929272	23929574	303	23929423	14.1395	4.41735	11.445	Os01g0607200	LOC_Os01g42234	AT2G01170.1	BAT1	bidirectional amino acid transporter 1
6	16889613	16889920	308	16889790	13.4982	4.41116	10.8257	Os06g0490200	None
12	26756556	26756929	374	26756763	10.4055	4.41114	7.8639	Os12g0626000	LOC_Os12g43090
11	19225503	19225797	295	19225642	11.9429	4.4091	9.33427	Os11g0529550	None
3	28658283	28658607	325	28658430	11.9429	4.4091	9.33427	Os03g0710700	LOC_Os03g50280	AT4G39670.1		Glycolipid transfer protein (GLTP) family protein
10	11408189	11408512	324	11408357	12.2251	4.39969	9.60242	Os10g0365466	None
6	20046614	20047333	720	20046768	12.8422	4.3994	10.1955	Os06g0535333	None
2	31146229	31146604	376	31146422	12.5079	4.39091	9.87459	Os02g0743200	LOC_Os02g50940	AT5G14890.1		NHL domain-containing protein
10	3119071	3119401	331	3119190	12.186	4.3862	9.56457	Os10g0151800	LOC_Os10g06130	AT4G00830.2		RNA-binding (RRM/RBD/RNP motifs) family protein
6	9865527	9865863	337	9865680	12.186	4.3862	9.56457	Os06g0281800	LOC_Os06g17000	AT5G25610.1	ATRD22,RD22	BURP domain-containing protein
3	32831854	32832135	282	32832004	10.0342	4.38436	7.51561	Os03g0789800	LOC_Os03g57580
1	31255327	31255651	325	31255502	16.7352	4.36647	13.9498	Os01g0746700	LOC_Os01g54300	AT2G20680.1		Glycosyl hydrolase superfamily protein
5	15463556	15463859	304	15463681	10.5941	4.36412	8.04653	Os05g0330600	LOC_Os05g26620
7	15881539	15881830	292	15881665	10.5941	4.36412	8.04653	Os07g0456500	LOC_Os07g27310	AT5G47510.1		Sec14p-like phosphatidylinositol transfer family protein
8	20523565	20523994	430	20523808	10.8979	4.36369	8.33059	Os08g0426900	LOC_Os08g33045
12	26174889	26175179	291	26175138	11.18	4.35509	8.60361	Os12g0616500	LOC_Os12g42200	AT3G17630.1	ATCHX19,CHX19	cation/H+ exchanger 19
2	29718879	29719157	279	29719038	10.8733	4.35427	8.30766	Os02g0716100	LOC_Os02g48550
9	19025519	19025897	379	19025706	10.8733	4.35427	8.30766	Os09g0491852	LOC_Os09g31514	AT2G33590.1		NAD(P)-binding Rossmann-fold superfamily protein
4	938824	939183	360	938995	16.9918	4.3541	14.1979	Os04g0115700	LOC_Os04g02530
3	2696800	2697102	303	2696969	11.4411	4.33925	8.8523	Os03g0148300	LOC_Os03g05450	AT2G46000.1
5	28987540	28988159	620	28988028	11.4411	4.33925	8.8523	Os05g0582350	None
3	10205828	10206163	336	10205976	14.7654	4.33153	12.047	Os03g0293000	LOC_Os03g18200	AT3G08970.1	ATERDJ3A,TMS1	DNAJ heat shock N-terminal domain-containing protein
1	2623873	2624309	437	2624133	9.8965	4.32701	7.38286	Os01g0148100	LOC_Os01g05510
9	17972436	17972929	494	17972622	9.87382	4.3176	7.36072	Os09g0471500	LOC_Os09g29540	AT1G21230.1	WAK5	wall associated kinase 5
3	17754570	17754971	402	17754694	9.57026	4.31609	7.06841	Os03g0425300	LOC_Os03g31180	AT5G07920.1	ATDGK1,DGK1	diacylglycerol kinase1
2	11708918	11709236	319	11709066	11.376	4.31582	8.79433	Os02g0301800	LOC_Os02g19890	AT3G46710.1		NB-ARC domain-containing disease resistance protein
8	10300790	10301180	391	10300947	12.8644	4.30795	10.2168	Os08g0269800	LOC_Os08g16840	AT5G57900.1	SKIP1	SKP1 interacting partner 1
1	18436018	18436373	356	18436199	9.82867	4.2989	7.31728	Os01g0519050	None
6	23113752	23114116	365	23113886	11.3115	4.29265	8.73129	Os06g0589300	LOC_Os06g38950	AT3G47740.1	ATATH2,ATH2	ABC2 homolog 2
9	19267576	19268384	809	19267759	12.7922	4.28513	10.1479	Os09g0498300	LOC_Os09g32280	AT5G24620.1		Pathogenesis-related thaumatin superfamily protein
10	22036965	22037257	293	22037090	10.0888	4.2832	7.56692	Os10g0559700	LOC_Os10g41030	AT4G17330.1	ATG2484-1,G2484-1	G2484-1 protein
3	33810007	33810306	300	33810137	10.984	4.2826	8.41379	Os03g0808750	None
11	9955647	9955944	298	9955781	10.3722	4.2773	7.83137	Os11g0279750	LOC_Os11g17790	AT5G43580.1		Serine protease inhibitor, potato inhibitor I-type family protein
9	15765068	15765672	605	15765207	12.1336	4.26609	9.51543	Os09g0431200	LOC_Os09g26160	AT2G29120.1	ATGLR2.7,GLR2.7	glutamate receptor 2.7
3	4347668	4347977	310	4347814	11.533	4.26509	8.93822	Os03g0183050	None
4	14006755	14007869	1115	14006925	8.55736	4.26078	6.11437	Os04g0309400	LOC_Os04g24414
1	36220883	36221190	308	36221033	10.3286	4.26035	7.7892	Os01g0843300	LOC_Os01g62570	AT5G27540.2	emb2473,MIRO1	MIRO-related GTP-ase 1
3	7295693	7296002	310	7295844	11.7981	4.25369	9.19392	Os03g0237950	LOC_Os03g13490	AT3G55820.1		Fasciclin-like arabinogalactan family protein
2	4089595	4089882	288	4089758	10.3069	4.25193	7.76875	Os02g0174500	None
10	18693990	18694350	361	18694197	11.4744	4.24471	8.88295	Os10g0492300	LOC_Os10g35030	AT1G06950.1	ATTIC110,TIC110	translocon at the inner envelope membrane of chloroplasts 110
4	28291563	28291889	327	28291715	11.4744	4.24471	8.88295	Os04g0564600	LOC_Os04g47690	AT1G20696.3	HMGB3,NFD03,NFD3	high mobility group B3
8	18756408	18756734	327	18756560	11.4744	4.24471	8.88295	Os08g0395300	LOC_Os08g30480	AT2G19790.1		SNARE-like superfamily protein
2	11729550	11729868	319	11729697	10.8771	4.24336	8.31066	Os02g0302450	None
9	18983941	18984424	484	18984242	10.8771	4.24336	8.31066	Os09g0491740	LOC_Os09g31478	AT1G20925.1		Auxin efflux carrier family protein
11	22517631	22517946	316	22517815	14.7345	4.24078	12.0172	Os11g0592300	LOC_Os11g37980	AT5G47780.1	GAUT4	galacturonosyltransferase 4
3	9479473	9479757	285	9479598	10.2421	4.22685	7.7058	Os03g0278566	None
11	24972774	24973060	287	24972912	9.93548	4.22197	7.4209	Os11g0634500	LOC_Os11g41610	AT3G43980.1		Ribosomal protein S14p/S29e family protein
8	28140818	28141148	331	28141005	10.8147	4.22054	8.25187	Os08g0562100	LOC_Os08g44810	AT5G58330.2		lactate/malate dehydrogenase family protein
8	21875866	21876189	324	21876010	11.3662	4.20723	8.78467	Os08g0448000	LOC_Os08g34790	AT3G21240.1	4CL2,AT4CL2	4-coumarate:CoA ligase 2
11	167938	168537	600	168097	10.7716	4.20483	8.21469	Os11g0104150	None
2	24778691	24779271	581	24779120	9.89227	4.2048	7.37879	Os02g0622400	LOC_Os02g40890	AT2G33470.1	ATGLTP1,GLTP1	glycolipid transfer protein 1
5	28987540	28988159	620	28987701	10.1567	4.19388	7.62404	Os05g0582350	None
10	1038330	1038668	339	1038571	10.1544	4.193	7.62244	Os10g0116000	LOC_Os10g02650	AT5G62370.1		Tetratricopeptide repeat (TPR)-like superfamily protein
9	20651485	20651781	297	20651627	10.1544	4.193	7.62244	Os09g0527900	LOC_Os09g35880	AT4G38960.1		B-box type zinc finger family protein
1	3477805	3478149	345	3477930	11.5922	4.18427	8.99558	Os01g0167900	LOC_Os01g07360	AT5G58320.2		Kinase interacting (KIP1-like) family protein
3	10500580	10500882	303	10500738	10.9963	4.18041	8.42583	Os03g0299200	LOC_Os03g18740	AT3G51680.1		NAD(P)-binding Rossmann-fold superfamily protein
2	12003668	12004002	335	12003826	10.4011	4.17599	7.85962	Os02g0306401	LOC_Os02g20360	AT5G53970.1		Tyrosine transaminase family protein
10	20310073	20310478	406	20310238	10.6883	4.17451	8.13764	Os10g0523201	None
10	5787541	5787864	324	5787728	10.0932	4.16948	7.56961	Os10g0184300	LOC_Os10g10500	AT4G39080.1	VHA-A3	vacuolar proton ATPase A3
4	30889231	30889563	333	30889385	12.4167	4.16748	9.78618	Os04g0609700	LOC_Os04g52020	AT1G79350.1	EMB1135	RING/FYVE/PHD zinc finger superfamily protein
5	3217707	3218051	345	3217866	10.0722	4.16141	7.55232	Os05g0154900	LOC_Os05g06290	AT3G52860.1
1	31726967	31727301	335	31727150	9.76419	4.15411	7.25445	Os01g0756101	LOC_Os01g55140
6	1621148	1621455	308	1621285	9.76419	4.15411	7.25445	Os06g0130200	LOC_Os06g03980	AT4G22860.1		Cell cycle regulated microtubule associated protein
5	3637441	3637763	323	3637591	10.3179	4.14498	7.77922	Os05g0161800	LOC_Os05g06940	AT3G17470.1	ATCRSH,CRSH	Ca2+-activated RelA/spot homolog
1	36428869	36429188	320	36429020	14.0569	4.13735	11.3652	Os01g0848200	LOC_Os01g62900	AT3G55610.1	P5CS2	delta 1-pyrroline-5-carboxylate synthase 2
12	3123948	3124668	721	3124452	11.4382	4.13277	8.85007	Os12g0161900	LOC_Os12g06480	AT1G43770.2		RING/FYVE/PHD zinc finger superfamily protein
8	11973187	11973574	388	11973346	11.4382	4.13277	8.85007	Os08g0296700	LOC_Os08g20000	AT3G14460.1		LRR and NB-ARC domains-containing disease resistance protein
4	7315794	7316188	395	7315980	10.2766	4.12965	7.73918	Os04g0209450	None
3	28045141	28045559	419	28045309	9.98863	4.12944	7.47197	Os03g0699600	LOC_Os03g49250	AT1G55000.3		peptidoglycan-binding LysM domain-containing protein
2	8855203	8855490	288	8855339	11.391	4.11707	8.80826	Os02g0256800	LOC_Os02g15710	AT2G02850.1	ARPN	plantacyanin
12	26028851	26029160	310	26028984	10.5241	4.11516	7.97853	Os12g0614100	LOC_Os12g41970	AT1G30370.1		alpha/beta-Hydrolases superfamily protein
3	12400890	12401221	332	12401059	10.2355	4.11443	7.69935	Os03g0335300	LOC_Os03g21720	AT3G52850.1	ATELP,ATELP1,ATVSR1,BP-80,BP80,BP80-1;1,BP80B,GFS1,VSR1,VSR1;1	vacuolar sorting receptor homolog 1
2	15224645	15225013	369	15224804	9.65919	4.11279	7.15319	Os02g0457325	None
8	27935155	27935500	346	27935364	9.65919	4.11279	7.15319	Os08g0558100	LOC_Os08g44390	AT3G10300.3		Calcium-binding EF-hand family protein
2	3308053	3308399	347	3308205	10.7769	4.10322	8.21746	Os02g0161251	None
7	23177788	23178154	367	23177933	15.3638	4.10276	12.6249	Os07g0573400	LOC_Os07g38590	AT3G13510.1		Protein of Unknown Function (DUF239)
2	30523061	30523417	357	30523225	9.06303	4.10201	6.58989	Os02g0732250	None
7	12996029	12996374	346	12996149	9.90604	4.09796	7.39217	Os07g0413300	LOC_Os07g23030
2	35292462	35292750	289	35292597	10.1744	4.09181	7.64144	Os02g0822200	LOC_Os02g57630	AT1G65650.1	UCH2	Peptidase C12, ubiquitin carboxyl-terminal hydrolase 1
3	26281699	26281990	292	26281829	12.7387	4.09034	10.0976	Os03g0667400	LOC_Os03g46460	AT1G79120.1		Ubiquitin carboxyl-terminal hydrolase family protein
5	28083391	28083674	284	28083545	9.88554	4.09017	7.37221	Os05g0564300	LOC_Os05g48970	AT1G53190.2		RING/U-box superfamily protein
4	20346299	20346644	346	20346465	10.1541	4.08433	7.62244	Os04g0412000	LOC_Os04g33600	AT2G36290.1		alpha/beta-Hydrolases superfamily protein
11	7058387	7058691	305	7058539	10.1147	4.06981	7.58556	Os11g0233000	LOC_Os11g12560	AT1G72180.1		Leucine-rich receptor-like protein kinase family protein
7	7275170	7275494	325	7275290	9.26703	4.06972	6.78661	Os07g0230700	LOC_Os07g12730	AT5G01750.2		Protein of unknown function (DUF567)
11	25811898	25812193	296	25812035	12.0786	4.06319	9.46516	Os11g0648400	LOC_Os11g42850
2	29872270	29872689	420	29872510	9.24632	4.06139	6.76686	Os02g0720000	LOC_Os02g48810	AT3G20280.1		RING/FYVE/PHD zinc finger superfamily protein
4	379900	380236	337	380057	11.1944	4.052	8.61749	Os04g0105900	LOC_Os04g01560
5	18770897	18771231	335	18771047	9.49437	4.04837	6.99575	Os05g0388025	None
6	4355204	4355495	292	4355341	9.49437	4.04837	6.99575	Os06g0186400	LOC_Os06g08720	AT4G30810.1	scpl29	serine carboxypeptidase-like 29
3	30399834	30400145	312	30400032	10.0535	4.04731	7.53417	Os03g0740833	None
8	20387791	20388093	303	20387920	10.6139	4.0464	8.06559	Os08g0424700	LOC_Os08g32880	AT3G07040.1	RPM1,RPS3	NB-ARC domain-containing disease resistance protein
1	38795156	38795524	369	38795294	10.0336	4.03999	7.51518	Os01g0892300	LOC_Os01g66820	AT5G48380.1	BIR1	BAK1-interacting receptor-like kinase 1
6	2997986	2998437	452	2998190	10.0336	4.03999	7.51518	Os06g0158800	LOC_Os06g06430	AT4G01140.1		Protein of unknown function (DUF1191)
3	21196351	21196683	333	21196516	9.7436	4.03642	7.2348	Os03g0578500	LOC_Os03g38170	AT3G19960.2	ATM1	myosin 1
2	4319038	4319423	386	4319205	11.4179	4.03306	8.83214	Os02g0178200	LOC_Os02g08160	AT3G26922.1		F-box/RNI-like superfamily protein
3	31822746	31823119	374	31822906	9.45376	4.03257	6.95936	Os03g0768900	LOC_Os03g55880	AT1G76600.1
2	6263297	6263591	295	6263474	10.2842	4.02923	7.74675	Os02g0212100	LOC_Os02g12060	AT1G61070.1	LCR66,PDF2.4	low-molecular-weight cysteine-rich 66
9	16202295	16202632	338	16202490	8.87469	4.02391	6.40993	Os09g0438100	LOC_Os09g26670	AT5G20790.1
3	17012846	17013163	318	17013017	9.41339	4.0169	6.92664	Os03g0411800	LOC_Os03g29850	AT1G55910.1	ZIP11	zinc transporter 11 precursor
1	7861549	7861932	384	7861746	9.68361	4.01382	7.17691	Os01g0242500	LOC_Os01g14040	AT4G18460.1		D-Tyr-tRNA(Tyr) deacylase family protein
10	18157344	18157628	285	18157484	9.68361	4.01382	7.17691	Os10g0481450	LOC_Os10g34030	AT2G28430.1
5	24625270	24625580	311	24625437	12.7309	4.00666	10.0908	Os05g0500400	LOC_Os05g42100	AT3G20680.1		Domain of unknown function (DUF1995)
7	4076976	4077381	406	4077220	10.7563	3.99946	8.19984	Os07g0177000	LOC_Os07g08040	AT2G26160.1		F-box family protein with a domain of unknown function (DUF295)
3	20549791	20550234	444	20550030	18.0021	3.99942	15.1754	Os03g0568400	LOC_Os03g37070	AT1G13090.1	CYP71B28	cytochrome P450, family 71, subfamily B, polypeptide 28
10	18142105	18142407	303	18142272	11.5849	3.99751	8.98872	Os10g0481150	None
11	23343343	23343912	570	23343530	11.0023	3.98896	8.43166	Os11g0605200	None
2	22095951	22096247	297	22096106	8.7873	3.98792	6.32967	Os02g0575700	LOC_Os02g36590	AT5G64550.1		loricrin-related
5	24269582	24269896	315	24269714	9.85635	3.97526	7.34411	Os05g0494000	LOC_Os05g41440	AT2G40890.1	CYP98A3	cytochrome P450, family 98, subfamily A, polypeptide 3
6	29054626	29055035	410	29054772	9.29366	3.97062	6.81216	Os06g0695451	None
2	3980100	3980410	311	3980238	9.2739	3.96301	6.79331	Os02g0172850	LOC_Os02g07654
2	2943885	2944239	355	2944056	10.0938	3.96173	7.56961	Os02g0153300	None
3	3559154	3559483	330	3559315	10.0938	3.96173	7.56961	Os03g0165900	LOC_Os03g06970	AT1G04770.1		Tetratricopeptide repeat (TPR)-like superfamily protein
3	4831089	4831438	350	4831284	10.0938	3.96173	7.56961	Os03g0192700	LOC_Os03g09250	AT2G22240.1	ATIPS2,ATMIPS2,MIPS2	myo-inositol-1-phosphate synthase 2
3	14786918	14787231	314	14787051	10.0938	3.96173	7.56961	Os03g0374900	LOC_Os03g25840	AT3G13620.1		Amino acid permease family protein
7	4949016	4949295	280	4949166	10.0938	3.96173	7.56961	Os07g0191700	LOC_Os07g09400	AT1G07910.1	ATRNL,RNL	RNAligase
7	17869725	17870067	343	17869942	10.0938	3.96173	7.56961	Os07g0486000	LOC_Os07g30240	AT4G17380.1	ATMSH4,MSH4	MUTS-like protein 4
1	34137743	34138114	372	34137949	10.0898	3.96032	7.56788	Os01g0805300	LOC_Os01g59090	AT3G56650.1		Mog1/PsbP/DUF1795-like photosystem II reaction center PsbP family protein
9	2387474	2387811	338	2387626	13.3918	3.95984	10.7247	Os09g0131150	None
9	22382679	22382963	285	22382816	11.4111	3.94368	8.82716	Os09g0563275	None
7	22927070	22927383	314	22927228	11.3986	3.9398	8.81571	Os07g0569600	LOC_Os07g38230	AT5G19855.1		Chaperonin-like RbcX protein
1	42598252	42598597	346	42598476	9.7405	3.93324	7.23241	Os01g0966000	LOC_Os01g73514	AT5G37830.1	OXP1	oxoprolinase 1
1	34861477	34861873	397	34861709	8.38049	3.93214	5.94597	Os01g0818400	LOC_Os01g60270	AT4G35550.1	ATWOX13,HB-4,WOX13	WUSCHEL related homeobox 13
11	2602846	2603263	418	2603085	12.7337	3.93048	10.0932	Os11g0155425	None
9	17463250	17463608	359	17463443	8.90368	3.92486	6.43804	Os09g0461900	LOC_Os09g28730	AT2G03550.1		alpha/beta-Hydrolases superfamily protein
3	7052654	7053251	598	7053082	10.5223	3.92129	7.97733	Os03g0232900	LOC_Os03g13040	AT4G37680.2	HHP4	heptahelical protein 4
1	34020603	34020906	304	34020727	9.43025	3.91908	6.93966	Os01g0802850	LOC_Os01g58870	AT2G25520.1		Drug/metabolite transporter superfamily protein
1	38318337	38318655	319	38318515	8.86451	3.9094	6.40162	Os01g0883000	LOC_Os01g66020	AT1G11050.1		Protein kinase superfamily protein
4	7905561	7905916	356	7905698	10.7502	3.90703	8.19626	Os04g0218350	None
6	24822597	24822885	289	24822739	10.7502	3.90703	8.19626	Os06g0618300	LOC_Os06g41410	AT3G18510.1
8	1595653	1596018	366	1595823	10.7502	3.90703	8.19626	Os08g0127900	LOC_Os08g03410	AT5G44120.3	ATCRA1,CRA1,CRU1	RmlC-like cupins superfamily protein
5	25758313	25758620	308	25758445	9.93775	3.90687	7.42271	Os05g0519000	LOC_Os05g44270	AT1G28280.1		VQ motif-containing protein
3	3355717	3356063	347	3355890	7.77809	3.90371	5.37934	Os03g0162000	LOC_Os03g06654	AT1G04610.1	YUC3	YUCCA 3
2	23907350	23907802	453	23907573	9.11785	3.90315	6.6429	Os02g0609400	LOC_Os02g39630	AT3G07580.1
9	253055	253558	504	253365	8.82556	3.89406	6.36506	Os09g0101200	LOC_Os09g01300
4	29660570	29660862	293	29660718	9.35282	3.89036	6.86821	Os04g0587400	LOC_Os04g49748	AT1G44750.1	ATPUP11,PUP11	purine permease 11
1	9902820	9903128	309	9902962	9.06023	3.88117	6.58732	Os01g0279400	LOC_Os01g17214	AT3G43790.1	ZIFL2	zinc induced facilitator-like 2
9	10799230	10799513	284	10799365	10.9235	3.87638	8.35522	Os09g0345500	LOC_Os09g17660	AT5G51440.1		HSP20-like chaperones superfamily protein
11	8825577	8825895	319	8825737	7.71685	3.87626	5.32105	Os11g0261900	LOC_Os11g15570	AT1G18480.1		Calcineurin-like metallo-phosphoesterase superfamily protein
1	42260624	42260969	346	42260801	9.04113	3.8739	6.56942	Os01g0958700	LOC_Os01g72860	AT4G24290.2		MAC/Perforin domain-containing protein
10	5542852	5543241	390	5543097	8.76549	3.87046	6.31126	Os10g0180800	LOC_Os10g10130	AT1G21230.1	WAK5	wall associated kinase 5
3	23753359	23753655	297	23753509	8.76549	3.87046	6.31126	Os03g0624900	LOC_Os03g42654
3	14533107	14533480	374	14533290	10.0884	3.86614	7.56687	Os03g0370200	LOC_Os03g25420	AT3G62200.1		Putative endonuclease or glycosyl hydrolase
1	39312319	39312613	295	39312459	9.27717	3.86241	6.79604	Os01g0902800	LOC_Os01g67640	AT1G32450.1	NRT1.5	nitrate transporter 1.5
11	2145000	2145372	373	2145156	8.47482	3.86057	6.03541	Os11g0147100	LOC_Os11g04990	AT1G03250.1
12	20847697	20847992	296	20847859	10.338	3.86028	7.79836	Os12g0528801	None
7	15233687	15233978	292	15233924	8.72918	3.85623	6.27906	Os07g0446050	None
2	34202573	34203069	497	34202738	10.045	3.85146	7.52599	Os02g0802250	None
11	20946103	20946387	285	20946239	8.71007	3.84875	6.2606	Os11g0562100	LOC_Os11g35710	AT2G07050.1	CAS1	cycloartenol synthase 1
10	11130794	11131098	305	11130920	8.41695	3.8372	5.98028	Os10g0361375	None
5	6458529	6458838	310	6458685	9.45862	3.83199	6.9623	Os05g0203800	LOC_Os05g11414	AT4G18960.1	AG	K-box region and MADS-box transcription factor family protein
8	25686723	25687020	298	25686870	8.39777	3.82948	5.96217	Os08g0517500	LOC_Os08g40570	AT1G51560.1		Pyridoxamine 5\'-phosphate oxidase family protein
11	22616495	22616891	397	22616669	13.4212	3.82924	10.7523	Os11g0593700	LOC_Os11g38140	AT1G57790.1		F-box family protein
2	29937482	29937779	298	29937617	8.65308	3.82649	6.20583	Os02g0721600	LOC_Os02g48964	AT5G56190.2		Transducin/WD40 repeat-like superfamily protein
7	20125872	20126168	297	20126015	10.7564	3.82417	8.19984	Os07g0521000	LOC_Os07g33680	AT4G32210.1	SDH3-2	succinate dehydrogenase 3-2
11	8900695	8900986	292	8900871	9.42565	3.82024	6.93687	Os11g0263000	LOC_Os11g15670	AT3G14460.1		LRR and NB-ARC domains-containing disease resistance protein
9	18456190	18456480	291	18456340	8.61536	3.81179	6.1698	Os09g0480900	LOC_Os09g30320	AT5G25610.1	ATRD22,RD22	BURP domain-containing protein
6	10185906	10186243	338	10186084	8.87161	3.80966	6.40808	Os06g0285900	LOC_Os06g17560	AT5G50140.1		Ankyrin repeat family protein
10	1837155	1837449	295	1837289	9.07322	3.78757	6.60003	Os10g0130200	LOC_Os10g04020	AT1G70360.1		F-box family protein
3	25326132	25326543	412	25326380	9.07322	3.78757	6.60003	Os03g0651950	None
6	6734504	6734919	416	6734669	8.28394	3.78377	5.85359	Os06g0229400	LOC_Os06g12410	AT1G74460.1		GDSL-like Lipase/Acylhydrolase superfamily protein
11	7004206	7004645	440	7004470	8.54057	3.78273	6.09888	Os11g0232000	LOC_Os11g12520	AT1G47710.1		Serine protease inhibitor (SERPIN) family protein
6	5599855	5600806	952	5600639	8.54057	3.78273	6.09888	Os06g0209700	LOC_Os06g10730
3	30149264	30149564	301	30149430	8.7976	3.78178	6.33811	Os03g0735800	LOC_Os03g52560	AT3G52600.1	AtcwINV2,CWINV2	cell wall invertase 2
6	12732831	12733223	393	12732965	8.522	3.77554	6.08081	Os06g0325602	None
10	11916575	11916858	284	11916713	8.77923	3.77488	6.32236	Os10g0375400	LOC_Os10g22930	AT2G34930.1		disease resistance family protein / LRR family protein
12	5573326	5573681	356	5573533	7.73378	3.7697	5.33743	Os12g0206800	LOC_Os12g10520	AT1G71692.1	AGL12,XAL1	AGAMOUS-like 12
12	4335003	4335355	353	4335189	8.76183	3.76834	6.30877	Os12g0185900	LOC_Os12g08550
12	25591692	25592123	432	25591813	8.76183	3.76834	6.30877	Os12g0606000	LOC_Os12g41270	AT5G10530.1		Concanavalin A-like lectin protein kinase family protein
3	8905870	8906181	312	8906010	8.76183	3.76834	6.30877	Os03g0268300	LOC_Os03g16140	AT4G00550.1	DGD2	digalactosyl diacylglycerol deficient 2
2	2517115	2517421	307	2517278	9.01862	3.76766	6.54791	Os02g0145500	LOC_Os02g05244
3	9032824	9033250	427	9033054	7.97095	3.76142	5.56317	Os03g0270200	LOC_Os03g16369
6	20832044	20832461	418	20832338	8.22779	3.76132	5.80035	Os06g0549950	None
2	26768027	26768331	305	26768184	8.72441	3.75431	6.27467	Os02g0661000	LOC_Os02g44220	AT3G03490.1	AtPEX19-1,PEX19-1	peroxin 19-1
3	12266655	12266945	291	12266804	8.46663	3.75412	6.02811	Os03g0332400	LOC_Os03g21460	AT3G10850.1	GLX2-2,GLY2	Metallo-hydrolase/oxidoreductase superfamily protein
11	26280896	26281271	376	26281070	10.7732	3.74948	8.21563	Os11g0656100	None
8	15512720	15513349	630	15512975	10.7732	3.74948	8.21563	Os08g0343600	LOC_Os08g25490	AT5G44400.1		FAD-binding Berberine family protein
10	20572951	20573336	386	20573190	7.93336	3.74594	5.52667	Os10g0528900	LOC_Os10g38540	AT1G10360.1	ATGSTU18,GST29,GSTU18	glutathione S-transferase TAU 18
1	30241060	30241354	295	30241222	8.92856	3.73493	6.46117	Os01g0725400	LOC_Os01g52610	AT1G79780.1		Uncharacterised protein family (UPF0497)
7	28451681	28451966	286	28451818	8.67003	3.73397	6.22262	Os07g0673100	LOC_Os07g47580	AT5G06360.1		Ribosomal protein S8e family protein
1	41059700	41060017	318	41059856	9.43494	3.73283	6.94244	Os01g0935400	LOC_Os01g70930	AT3G21420.1		2-oxoglutarate (2OG) and Fe(II)-dependent oxygenase superfamily protein
1	41687027	41687316	290	41687176	9.43494	3.73283	6.94244	Os01g0947800	None
12	3324957	3325267	311	3325092	9.43494	3.73283	6.94244	Os12g0165600	LOC_Os12g06840	AT5G13150.1	ATEXO70C1,EXO70C1	exocyst subunit exo70 family protein C1
6	1844232	1844769	538	1844651	8.652	3.72724	6.20496	Os06g0134300	LOC_Os06g04330
11	6592526	6593546	1021	6593397	8.39353	3.72593	5.95811	Os11g0226100	LOC_Os11g11880
11	15563703	15564089	387	15563885	8.39353	3.72593	5.95811	Os11g0458600	LOC_Os11g27030	AT3G06190.1	ATBPM2,BPM2	BTB-POZ and MATH domain 2
2	28700328	28700640	313	28700507	8.39353	3.72593	5.95811	Os02g0698000	LOC_Os02g47020	AT1G32060.1	PRK	phosphoribulokinase
4	23437740	23438255	516	23438148	7.85887	3.71534	5.45562	Os04g0469300	LOC_Os04g39380	AT5G48290.1		Heavy metal transport/detoxification superfamily protein
11	16767891	16768201	311	16768040	8.61609	3.71385	6.17044	Os11g0479232	LOC_Os11g28980	AT3G07140.1		GPI transamidase component Gpi16 subunit family protein
6	24126719	24127044	326	24126921	8.09674	3.70919	5.68234	Os06g0607000	LOC_Os06g40490	AT2G26600.1		Glycosyl hydrolase superfamily protein
8	12170032	12170364	333	12170198	8.09674	3.70919	5.68234	Os08g0299000	LOC_Os08g20270	AT2G25280.1
7	1636436	1636722	287	1636569	7.32491	3.70271	4.95734	Os07g0131250	LOC_Os07g03910	AT5G61520.1		Major facilitator superfamily protein
1	7852398	7852751	354	7852534	8.0623	3.69555	5.65	Os01g0242300	LOC_Os01g14020	AT1G28510.1		Optic atrophy 3 protein (OPA3)
3	27304661	27304963	303	27304816	7.80361	3.69272	5.40383	Os03g0684700	LOC_Os03g48030	AT5G62720.1	ATNITR2;1	Integral membrane HPP family protein
6	3170049	3170376	328	3170185	7.80361	3.69272	5.40383	Os06g0162800	LOC_Os06g06750	AT1G24260.2	AGL9,SEP3	K-box region and MADS-box transcription factor family protein
1	22456613	22457063	451	22456941	8.80441	3.69007	6.34441	Os01g0580150	LOC_Os01g39820	AT1G21240.1	WAK3	wall associated kinase 3
7	3197917	3198263	347	3198082	8.80441	3.69007	6.34441	Os07g0159800	LOC_Os07g06590	AT3G11780.1		MD-2-related lipid recognition domain-containing protein / ML domain-containing protein
7	21158665	21158947	283	21158807	8.80441	3.69007	6.34441	Os07g0538200	LOC_Os07g35370	AT4G05200.1	CRK25	cysteine-rich RLK (RECEPTOR-like protein kinase) 25
3	2022554	2022859	306	2022710	8.78685	3.68374	6.32967	Os03g0136800	LOC_Os03g04400	AT5G23590.1		DNAJ heat shock N-terminal domain-containing protein
12	7164412	7164746	335	7164573	8.77298	3.67875	6.31624	Os12g0231000	LOC_Os12g12934	AT1G59740.1		Major facilitator superfamily protein
2	35157987	35158430	444	35158132	8.77298	3.67875	6.31624	Os02g0819200	LOC_Os02g57380	AT5G04260.1	WCRKC2	WCRKC thioredoxin 2
4	27823385	27823760	376	27823590	8.77298	3.67875	6.31624	Os04g0555800	LOC_Os04g46920	AT5G52380.1		VASCULAR-RELATED NAC-DOMAIN 6
7	5803424	5803766	343	5803597	8.77298	3.67875	6.31624	Os07g0207700	LOC_Os07g10690	AT5G11860.3	SSP5	SCP1-like small phosphatase 5
9	19793927	19794671	745	19794448	8.50951	3.67425	6.0687	Os09g0510000	LOC_Os09g33559
1	40783928	40784229	302	40784084	7.73071	3.66298	5.33447	Os01g0929100	LOC_Os01g70400	AT5G43750.1	NDH18	NAD(P)H dehydrogenase 18
1	29619339	29619674	336	29619512	7.71263	3.65562	5.31691	Os01g0713200	LOC_Os01g51570	AT3G57260.1	BG2,BGL2,PR-2,PR2	beta-1,3-glucanase 2
12	27483202	27483520	319	27483410	9.45588	3.65496	6.96021	Os12g0640800	LOC_Os12g44330	AT3G25840.1		Protein kinase superfamily protein
5	27852213	27852511	299	27852347	7.45321	3.65083	5.07666	Os05g0559400	LOC_Os05g48590	AT2G22670.4	IAA8	indoleacetic acid-induced protein 8
3	35513119	35513560	442	35513340	7.6946	3.64829	5.30015	Os03g0844700	LOC_Os03g62750	AT1G24490.1	ALB4,ARTEMIS	OxaA/YidC-like membrane insertion protein
4	11918780	11919175	396	11919003	7.6946	3.64829	5.30015	Os04g0280600	LOC_Os04g21160	AT5G14180.1	MPL1	Myzus persicae-induced lipase 1
3	2271945	2272282	338	2272144	7.62304	3.61926	5.23292	Os03g0141100	LOC_Os03g04760
4	26403085	26403370	286	26403303	7.62304	3.61926	5.23292	Os04g0528400	LOC_Os04g44620	AT1G52530.1
1	35509774	35510081	308	35509934	8.11006	3.61761	5.6925	Os01g0830000	LOC_Os01g61400	AT4G04770.1	ABC1,ATABC1,ATNAP1,LAF6	ATP binding cassette protein 1
9	20545017	20545403	387	20545166	8.11006	3.61761	5.6925	Os09g0525700	LOC_Os09g35720	AT4G11720.1	GCS1,HAP2	hapless 2
2	2491798	2492105	308	2491960	8.07452	3.60414	5.66198	Os02g0145200	None
1	30878454	30878745	292	30878581	8.79641	3.59951	6.33716	Os01g0739400	LOC_Os01g53720	AT2G25870.1		haloacid dehalogenase-like hydrolase family protein
4	4917719	4918148	430	4917959	8.79641	3.59951	6.33716	Os04g0172100	None
6	24347550	24348099	550	24347867	8.79641	3.59951	6.33716	Os06g0610800	LOC_Os06g40818	AT5G10770.1		Eukaryotic aspartyl protease family protein
1	4277419	4277739	321	4277557	7.81342	3.59769	5.41335	Os01g0181000	LOC_Os01g08580	AT5G48385.1		FRIGIDA-like protein
5	3353143	3353586	444	3353320	8.05726	3.59761	5.64516	Os05g0157300	LOC_Os05g06510
4	29105237	29105561	325	29105423	9.4867	3.58516	6.98887	Os04g0577200	LOC_Os04g48790	AT2G46710.1		Rho GTPase activating protein with PAK-box/P21-Rho-binding domain
9	19073510	19073849	340	19073708	7.5348	3.58361	5.15116	Os09g0492700	LOC_Os09g31970	AT1G76490.1	HMG1,HMGR1	hydroxy methylglutaryl CoA reductase 1
6	14207947	14208225	279	14208087	7.72695	3.56399	5.33088	Os06g0350600	LOC_Os06g24290	AT4G33720.1		CAP (Cysteine-rich secretory proteins, Antigen 5, and Pathogenesis-related 1 protein) superfamily protein
5	23242005	23242311	307	23242196	10.8738	3.56385	8.30806	Os05g0473000	LOC_Os05g39580	AT5G05440.1	PYL5,RCAR8	Polyketide cyclase/dehydrase and lipid transport superfamily protein
12	2241764	2242267	504	2242017	7.95468	3.5589	5.5473	Os12g0145566	None
6	2330894	2331177	284	2331023	7.22082	3.55372	4.85859	Os06g0143900	LOC_Os06g05180
6	27596657	27596967	311	27596806	7.6927	3.55068	5.29841	Os06g0666500	LOC_Os06g45580	AT5G05280.1		RING/U-box superfamily protein
2	6442045	6442357	313	6442186	7.44788	3.54867	5.07145	Os02g0215000	LOC_Os02g12360	AT5G62760.3		P-loop containing nucleoside triphosphate hydrolases superfamily protein
11	22577350	22577628	279	22577485	8.13633	3.53726	5.71539	Os11g0593000	LOC_Os11g38050	AT3G03530.1	NPC4	non-specific phospholipase C4
3	10868399	10868723	325	10868548	8.13633	3.53726	5.71539	Os03g0306200	LOC_Os03g19340	AT5G49430.1		WD40/YVTN repeat-like-containing domain;Bromodomain
6	2508158	2508781	624	2508293	7.41347	3.53488	5.04064	Os06g0148100	LOC_Os06g05540
10	19031068	19031547	480	19031251	9.52596	3.52224	7.02587	Os10g0498800	LOC_Os10g35570	AT2G47960.1
3	7813041	7813383	343	7813205	9.52596	3.52224	7.02587	Os03g0247900	LOC_Os03g14370	AT1G12420.1	ACR8	ACT domain repeat 8
10	11722273	11722628	356	11722457	7.85376	3.52102	5.45067	Os10g0371000	LOC_Os10g22590	AT4G08685.1	SAH7	Pollen Ole e 1 allergen and extensin family protein
1	35958987	35959362	376	35959160	7.36224	3.51439	4.99315	Os01g0838350	None		OsPI1	Phosphate-limitation Inducible Gene 1
12	19431838	19432163	326	19432006	7.34527	3.50762	4.9765	Os12g0506500	LOC_Os12g32190	AT5G15430.1		Plant calmodulin-binding protein-related
3	11219048	11219423	376	11219353	7.34527	3.50762	4.9765	Os03g0313800	LOC_Os03g19940	AT5G49525.1
12	1645246	1645533	288	1645403	7.57436	3.50488	5.18667	Os12g0133400	LOC_Os12g03960	AT3G11470.1		4\'-phosphopantetheinyl transferase superfamily
12	8791771	8792210	440	8792070	7.57436	3.50488	5.18667	Os12g0256000	LOC_Os12g15400	AT5G14310.1	AtCXE16,CXE16	carboxyesterase 16
8	402534	402843	310	402662	6.85412	3.49905	4.51731	Os08g0108300	LOC_Os08g01690
8	26416779	26417063	285	26416914	7.55764	3.49844	5.17271	Os08g0530400	LOC_Os08g41830	AT3G01910.1	AT-SO,AtSO,SOX	sulfite oxidase
10	21751012	21751309	298	21751175	7.08248	3.49648	4.72915	Os10g0554100	LOC_Os10g40590	AT4G22540.1	ORP2A	OSBP(oxysterol binding protein)-related protein 2A
5	26283802	26284156	355	26283929	8.00117	3.48828	5.59138	Os05g0529000	LOC_Os05g45280	AT2G20120.1	COV1	Protein of unknown function (DUF502)
9	19484660	19485074	415	19484800	8.00117	3.48828	5.59138	Os09g0503850	None
3	7828641	7828972	332	7828830	7.50777	3.47924	5.12757	Os03g0248000	LOC_Os03g14380	AT2G31260.1	APG9,ATAPG9	autophagy 9 (APG9)
7	26422923	26423442	520	26423013	7.01459	3.46855	4.66487	Os07g0636200	LOC_Os07g44210	AT1G48310.1	CHA18,CHR18	chromatin remodeling factor18
8	27680922	27681248	327	27681091	7.01459	3.46855	4.66487	Os08g0553100	LOC_Os08g43920	AT2G17080.1		Arabidopsis protein of unknown function (DUF241)
1	3421561	3421848	288	3421735	7.47558	3.46688	5.09618	Os01g0166700	LOC_Os01g07250	AT3G51730.1		saposin B domain-containing protein
12	9518184	9518765	582	9518646	7.47558	3.46688	5.09618	Os12g0267064	None
1	22629421	22629850	430	22629776	8.17331	3.4662	5.74927	Os01g0583200	LOC_Os01g40110	AT2G19385.1		zinc ion binding
1	27064364	27064671	308	27064518	8.17331	3.4662	5.74927	Os01g0663051	LOC_Os01g47370	AT1G75250.2	ATRL6,RL6,RSM3	RAD-like 6
1	6679178	6679471	294	6679360	8.87253	3.46566	6.40809	Os01g0222001	None
1	22867338	22867812	475	22867485	8.87253	3.46566	6.40809	Os01g0587150	None
10	7419858	7420164	307	7420012	8.87253	3.46566	6.40809	Os10g0204100	LOC_Os10g13670	AT3G09770.1		RING/U-box superfamily protein
4	20944180	20944508	329	20944343	9.57251	3.46522	7.07003	Os04g0423600	LOC_Os04g34610	AT1G43245.1		SET domain-containing protein
4	28049727	28050220	494	28049850	6.99775	3.46163	4.64855	Os04g0559750	None
7	4218095	4218410	316	4218246	6.98096	3.45475	4.63221	Os07g0180100	LOC_Os07g08270	AT5G45480.1		Protein of unknown function (DUF594)
4	34249778	34250081	304	34249944	7.67291	3.45363	5.28088	Os04g0671300	LOC_Os04g57560	AT1G65840.1	ATPAO4,PAO4	polyamine oxidase 4
6	6105722	6106029	308	6105864	7.40928	3.44147	5.03666	Os06g0218900	LOC_Os06g11520	AT5G65290.1		LMBR1-like membrane protein
5	888834	889129	296	888979	7.84027	3.4304	5.4376	Os05g0116350	None
10	15254094	15254440	347	15254259	6.91431	3.42747	4.57151	Os10g0428900	LOC_Os10g29330	AT5G19000.1	ATBPM1,BPM1	BTB-POZ and MATH domain 1
4	30733774	30734122	349	30734035	6.6836	3.42656	4.35782	Os04g0607583	None
4	26378153	26379152	1000	26378947	8.27314	3.42102	5.84339	Os04g0527900	LOC_Os04g44570	AT1G17810.1	BETA-TIP	beta-tonoplast intrinsic protein
4	14013966	14014638	673	14014107	10.3281	3.41724	7.78883	Os04g0309751	None
4	9686075	9686361	287	9686209	6.65015	3.41242	4.3272	Os04g0250200	LOC_Os04g17680
10	22177624	22177984	361	22177785	8.21925	3.4029	5.79213	Os10g0562100	LOC_Os10g41260	AT5G47390.1		myb-like transcription factor family protein
3	30830006	30830303	298	30830170	7.97839	3.39845	5.57008	Os03g0749000	LOC_Os03g53780	AT2G38290.1	AMT2,AMT2;1,ATAMT2	ammonium transporter 2
8	18853750	18854046	297	18853903	6.38573	3.39594	4.0804	Os08g0396500	LOC_Os08g30590	AT2G16050.1		Cysteine/Histidine-rich C1 domain family protein
3	21680431	21680714	284	21680618	7.51301	3.39456	5.13246	Os03g0587000	LOC_Os03g39000	AT3G02870.1	VTC4	Inositol monophosphatase family protein
3	28253213	28253580	368	28253409	11.092	3.3798	8.5188	Os03g0703100	LOC_Os03g49610	AT3G18080.1	BGLU44	B-S glucosidase 44
11	19414589	19414909	321	19414843	6.1139	3.37457	3.83045	Os11g0533000	LOC_Os11g32870
6	1714814	1715175	362	1714958	6.1139	3.37457	3.83045	Os06g0132000	LOC_Os06g04110
1	36128898	36129286	389	36129137	6.78343	3.3742	4.45258	Os01g0841600	LOC_Os01g62420	AT3G55440.1	ATCTIMC,CYTOTPI,TPI	triosephosphate isomerase
4	22167065	22167586	522	22167354	7.38807	3.34874	5.01697	Os04g0444400	LOC_Os04g36680	AT4G02600.1	ATMLO1,MLO1	Seven transmembrane MLO family protein
8	12311229	12311518	290	12311416	7.38807	3.34874	5.01697	Os08g0300100	LOC_Os08g20500
9	11536403	11536771	369	11536658	6.05382	3.34743	3.77464	Os09g0357300	LOC_Os09g19274
3	28765014	28765297	284	28765149	6.9366	3.34633	4.59299	Os03g0712000	LOC_Os03g50410	AT3G49050.1		alpha/beta-Hydrolases superfamily protein
5	3664269	3664635	367	3664451	6.70322	3.34174	4.37655	Os05g0162200	LOC_Os05g06980	AT5G13560.1
9	4030349	4030730	382	4030544	7.12337	3.33293	4.76512	Os09g0252800	LOC_Os09g07900	AT1G55860.1	UPL1	ubiquitin-protein ligase 1
12	8833409	8833725	317	8833538	7.5662	3.33288	5.17942	Os12g0257000	LOC_Os12g15470	AT4G12910.1	scpl20	serine carboxypeptidase-like 20
1	5025779	5026068	290	5025917	9.74704	3.32231	7.23811	Os01g0193600	LOC_Os01g09750	AT3G21300.1		RNA methyltransferase family protein
5	2540861	2541364	504	2540992	6.87389	3.32189	4.5344	Os05g0144150	None
7	24344605	24344884	280	24344752	7.53034	3.32022	5.14689	Os07g0597100	LOC_Os07g40620	AT5G39410.1		Saccharopine dehydrogenase
11	3620242	3620554	313	3620371	7.96892	3.31931	5.5613	Os11g0173366	None
10	17250302	17250584	283	17250480	6.8591	3.31614	4.52002	Os10g0467200	LOC_Os10g32960	AT3G04460.1	APM4,ATPEX12,PEX12	peroxin-12
3	25228666	25228946	281	25228816	6.85832	3.31584	4.52002	Os03g0650300	LOC_Os03g44750	AT2G27180.1
9	18624276	18624587	312	18624406	5.75475	3.31034	3.49942	Os09g0482821	None
4	20740585	20740865	281	20740732	6.60853	3.3036	4.28815	Os04g0419700	LOC_Os04g34250	AT2G19130.1		S-locus lectin protein kinase family protein
1	2050289	2050648	360	2050533	6.15608	3.2962	3.86964	Os01g0138232	None
1	41881119	41881418	300	41881269	7.01589	3.29254	4.6661	Os01g0951100	LOC_Os01g72230	AT3G07940.1		Calcium-dependent ARF-type GTPase activating protein family
1	40588727	40589184	458	40588869	6.14008	3.2893	3.85503	Os01g0925700	LOC_Os01g70130	AT5G50860.1		Protein kinase superfamily protein
1	32292747	32293047	301	32293001	5.68845	3.27945	3.43734	Os01g0766400	LOC_Os01g56090	AT2G24970.1
1	1832437	1832769	333	1832567	6.54634	3.27865	4.22906	Os01g0133100	LOC_Os01g04160	AT3G58650.1
6	20903179	20903471	293	20903297	6.32711	3.2772	4.02736	Os06g0551400	LOC_Os06g35814	AT4G18800.1	ATHSGBP,ATRAB11B,ATRABA1D,RABA1d	RAB GTPase homolog A1D
10	13885480	13885811	332	13885686	7.62378	3.27686	5.23292	Os10g0406300	LOC_Os10g26620	AT5G39660.2	CDF2	cycling DOF factor 2
11	18466902	18467183	282	18467071	7.62378	3.27686	5.23292	Os11g0515000	LOC_Os11g31590	AT5G50900.1		ARM repeat superfamily protein
11	25778922	25779215	294	25779059	7.62378	3.27686	5.23292	Os11g0648100	LOC_Os11g42800	AT5G27950.1		P-loop containing nucleoside triphosphate hydrolases superfamily protein
7	6492794	6493133	340	6492962	7.62378	3.27686	5.23292	Os07g0217600	LOC_Os07g11739	AT5G25140.1	CYP71B13	cytochrome P450, family 71, subfamily B, polypeptide 13
3	4140850	4141203	354	4141029	8.70387	3.27546	6.25471	Os03g0178550	None
11	23942937	23943382	446	23943149	6.53091	3.27247	4.21406	Os11g0615700	LOC_Os11g40140	AT1G53850.1	ATPAE1,PAE1	20S proteasome alpha subunit E1
2	31094690	31095099	410	31094960	6.31149	3.27072	4.01334	Os02g0742351	None
4	231084	231406	323	231229	6.06088	3.25523	3.78044	Os04g0103300	LOC_Os04g01300	AT3G07950.1		rhomboid protein-related
12	1783085	1783392	308	1783294	6.91351	3.25428	4.5709	Os12g0136900	LOC_Os12g04220	AT3G57330.1	ACA11	autoinhibited Ca2+-ATPase 11
12	17932293	17932643	351	17932503	5.82583	3.24526	3.56286	Os12g0485000	LOC_Os12g29990	AT2G45270.1	GCP1	glycoprotease 1
11	8096774	8097161	388	8096973	6.23408	3.23869	3.94093	Os11g0249900	LOC_Os11g14420	AT5G48380.1	BIR1	BAK1-interacting receptor-like kinase 1
8	26431179	26431476	298	26431344	6.01397	3.23513	3.738	Os08g0530600	LOC_Os08g41850
7	1723398	1723735	338	1723488	5.57476	3.22676	3.33462	Os07g0132800	LOC_Os07g04070
1	30711342	30711627	286	30711470	6.20181	3.22538	3.91206	Os01g0736400	LOC_Os01g53450	AT5G04620.2	ATBIOF,BIOF	biotin F
9	22915256	22915624	369	22915435	7.23525	3.2169	4.87222	Os09g0573000	LOC_Os09g39970	AT5G66520.1		Tetratricopeptide repeat (TPR)-like superfamily protein
1	36295601	36296243	643	36295750	6.36407	3.20602	4.05987	Os01g0845000	None
1	33359076	33359361	286	33359210	5.73148	3.20336	3.4781	Os01g0786601	None
12	7520319	7520632	314	7520542	5.71594	3.19648	3.46311	Os12g0236700	LOC_Os12g13440	AT3G14270.1	FAB1B	phosphatidylinositol-4-phosphate 5-kinase family protein
7	24057361	24057741	381	24057562	5.48869	3.18709	3.25568	Os07g0590000	None
2	19730974	19731372	399	19731141	7.75738	3.18138	5.3592	Os02g0535400	LOC_Os02g33180	AT5G51700.1	ATRAR1,PBS2,RAR1,RPR2	protein binding;zinc ion binding
3	31873896	31874181	286	31874050	7.75738	3.18138	5.3592	Os03g0769900	LOC_Os03g56000	AT1G10150.1		Carbohydrate-binding protein
2	19458687	19459024	338	19458888	6.49746	3.17688	4.18341	Os02g0529700	LOC_Os02g32760	AT3G44590.1		60S acidic ribosomal protein family
5	17950344	17950958	615	17950507	6.49746	3.17688	4.18341	Os05g0372800	LOC_Os05g30920	AT4G15563.1
1	20656430	20656709	280	20656592	6.26136	3.16541	3.96495	Os01g0550950	None
5	28853859	28854148	290	28853990	6.26136	3.16541	3.96495	Os05g0579800	LOC_Os05g50360	AT2G18290.1	APC10	anaphase promoting complex 10
3	18567242	18567529	288	18567403	6.05306	3.16434	3.77394	Os03g0439500	LOC_Os03g32470	AT1G17020.1	ATSRG1,SRG1	senescence-related gene 1
8	16510428	16510720	293	16510570	6.05306	3.16434	3.77394	Os08g0359050	LOC_Os08g27020
12	23946047	23946457	411	23946309	7.04426	3.15083	4.69222	Os12g0578600	LOC_Os12g38940
3	15469189	15469470	282	15469398	7.04426	3.15083	4.69222	Os03g0387900	LOC_Os03g27019	AT5G64170.2		dentin sialophosphoprotein-related
1	10566141	10566482	342	10566273	7.24577	3.14955	4.88206	Os01g0291500	LOC_Os01g18744	AT3G62160.1		HXXXD-type acyl-transferase family protein
6	5355142	5355619	478	5355276	5.801	3.14449	3.5395	Os06g0206000	LOC_Os06g10420	AT5G12040.1		Nitrilase/cyanide hydratase and apolipoprotein N-acyltransferase family protein
5	23586253	23586532	280	23586390	6.20245	3.14221	3.91206	Os05g0479700	LOC_Os05g40150	AT3G07040.1	RPM1,RPS3	NB-ARC domain-containing disease resistance protein
5	17971671	17971953	283	17971857	6.35398	3.12236	4.05062	Os05g0373000	LOC_Os05g30950	AT1G08820.1	VAP27-2	vamp/synaptobrevin-associated protein 27-2
3	3983415	3983706	292	3983552	6.32867	3.11279	4.02736	Os03g0174400	LOC_Os03g07830	AT3G57600.1		Integrase-type DNA-binding superfamily protein
4	34588811	34589111	301	34588969	6.1164	3.10847	3.83286	Os04g0677100	LOC_Os04g58070	AT3G20015.1		Eukaryotic aspartyl protease family protein
1	25834784	25835068	285	25834907	7.11827	3.10714	4.76014	Os01g0642700	LOC_Os01g45520	AT2G19130.1		S-locus lectin protein kinase family protein
9	1860830	1861116	287	1860962	6.5073	3.10446	4.19176	Os09g0124232	LOC_Os09g03680	AT3G04710.1		ankyrin repeat family protein
10	8195992	8196332	341	8196197	7.10906	3.10409	4.753	Os10g0315400	LOC_Os10g16440	AT4G02880.2
9	19076089	19076430	342	19076289	7.91003	3.10301	5.50451	Os09g0492700	LOC_Os09g31970	AT1G76490.1	HMG1,HMGR1	hydroxy methylglutaryl CoA reductase 1
4	29503490	29503794	305	29503599	6.08804	3.09738	3.80622	Os04g0583900	LOC_Os04g49450	AT5G37260.1	CIR1,RVE2	Homeodomain-like superfamily protein
8	23120211	23120571	361	23120363	6.05984	3.08637	3.77988	Os08g0470200	LOC_Os08g36630	AT1G08080.1	ACA7,ATACA7	alpha carbonic anhydrase 7
6	2299667	2300034	368	2299898	5.65458	3.0828	3.40736	Os06g0143700	LOC_Os06g05160	AT3G15990.1	SULTR3;4	sulfate transporter 3;4
11	18357477	18357802	326	18357669	6.21429	3.06968	3.92261	Os11g0513500	LOC_Os11g31430	AT3G05040.1	HST,HST1	ARM repeat superfamily protein
2	22476885	22477181	297	22477100	6.21429	3.06968	3.92261	Os02g0582800	LOC_Os02g37180	AT3G20180.1		Copper transport protein family
1	42417227	42417532	306	42417361	6.40233	3.06625	4.09459	Os01g0962200	LOC_Os01g73120	AT1G71190.1	SAG18	senescence associated gene 18
5	17213248	17213776	529	17213426	5.61155	3.06476	3.3669	Os05g0361200	LOC_Os05g29760	AT2G30390.1	ATFC-II,FC-II,FC2	ferrochelatase 2
6	27411057	27411486	430	27411257	5.61001	3.06411	3.36605	Os06g0663900	LOC_Os06g45350	AT5G65530.1		Protein kinase superfamily protein
4	33991991	33992321	331	33992254	5.75156	3.04212	3.49627	Os04g0665900	LOC_Os04g57030	AT3G58000.1		VQ motif-containing protein
8	28131995	28132289	295	28132160	5.30147	3.01519	3.08452	Os08g0561700	LOC_Os08g44770	AT2G28190.1	CSD2,CZSOD2	copper/zinc superoxide dismutase 2
1	37044994	37045313	320	37045142	5.68317	3.01467	3.43241	Os01g0857300	LOC_Os01g63840	AT5G03770.1	KDTA	KDO transferase A
10	19591829	19592109	281	19591990	5.68317	3.01467	3.43241	Os10g0509700	None
9	17496755	17497063	309	17496923	8.16477	3.00869	5.7432	Os09g0462700	LOC_Os09g28810	AT1G47490.1	ATRBP47C,RBP47C	RNA-binding protein 47C
12	19627253	19627936	684	19627722	4.86456	2.98893	2.68846	Os12g0509600	LOC_Os12g32520
1	30559139	30559445	307	30559301	6.56462	2.98764	4.24556	Os01g0732700	LOC_Os01g53200	AT4G13260.1	YUC2	Flavin-binding monooxygenase family protein
2	2578612	2578930	319	2578786	4.47965	2.98255	2.34319	Os02g0146900	LOC_Os02g05360
4	31940288	31940578	291	31940462	4.47965	2.98255	2.34319	Os04g0627400	LOC_Os04g53580	AT4G28556.1	RIC7	PAK-box/P21-Rho-binding family protein
10	693261	693629	369	693488	5.58744	2.97643	3.34678	Os10g0109900	LOC_Os10g02100	AT1G62200.1		Major facilitator superfamily protein
5	26484406	26484693	288	26484622	5.7625	2.9713	3.50405	Os05g0533600	LOC_Os05g45720	AT4G18240.1	ATSS4,SS4,SSIV	starch synthase 4
10	23042877	23043180	304	23043019	6.65173	2.95414	4.32803	Os10g0577900	LOC_Os10g42720	AT1G32200.2	ACT1,ATS1	phospholipid/glycerol acyltransferase family protein
11	15914057	15914508	452	15914231	5.14881	2.94948	2.94379	Os11g0464700	None
3	20021023	20021379	357	20021150	5.14881	2.94948	2.94379	Os03g0559700	LOC_Os03g36080
1	18409462	18409788	327	18409729	4.95983	2.9476	2.77403	Os01g0518651	None
5	26957155	26957476	322	26957388	5.49429	2.9394	3.26035	Os05g0543100	LOC_Os05g46550	AT1G60780.1	HAP13	Clathrin adaptor complexes medium subunit family protein
6	10684294	10684664	371	10684386	5.84688	2.93294	3.58108	Os06g0291500	LOC_Os06g18820	AT5G47740.1		Adenine nucleotide alpha hydrolases-like superfamily protein
4	3558567	3558858	292	3558781	5.65503	2.93015	3.40736	Os04g0151800	LOC_Os04g06770	AT2G27040.2	AGO4,OCP11	Argonaute family protein
12	20546947	20547237	291	20547096	15.1468	2.91972	12.4158	Os12g0524750	LOC_Os12g34045	ATMG01270.1		mitochondrial ribosomal protein S7
3	29045651	29046012	362	29045793	5.25472	2.91684	3.04004	Os03g0717600	LOC_Os03g50850	AT5G06160.1	ATO	splicing factor-related
5	14490101	14490423	323	14490216	5.04112	2.90345	2.84681	Os05g0314700	LOC_Os05g25040	AT5G49110.2
5	16472663	16472957	295	16472814	5.03969	2.90284	2.84613	Os05g0349000	LOC_Os05g28170
9	16841278	16841816	539	16841525	5.03969	2.90284	2.84613	Os09g0449650	None
2	35408483	35408787	305	35408635	5.93542	2.89876	3.66293	Os02g0824100	LOC_Os02g57810	AT5G52400.1	CYP715A1	cytochrome P450, family 715, subfamily A, polypeptide 1
11	13635499	13635813	315	13635760	5.01462	2.89217	2.82418	Os11g0427500	LOC_Os11g24050	AT2G24960.1
10	2951837	2952209	373	2952018	12.3269	2.87762	9.70039	Os10g0149100	LOC_Os10g05840
6	3596880	3597184	305	3597033	6.02745	2.86813	3.75004	Os06g0171600	LOC_Os06g07474	AT1G65080.1		Membrane insertion protein, OxaA/YidC with tetratricopeptide repeat domain
1	25039173	25039524	352	25039374	5.1254	2.86394	2.92132	Os01g0627400	LOC_Os01g43700	AT3G14660.1	CYP72A13	cytochrome P450, family 72, subfamily A, polypeptide 13
3	15749224	15749543	320	15749348	5.1254	2.86394	2.92132	Os03g0392250	None
1	36295601	36296243	643	36296194	5.11197	2.85847	2.9122	Os01g0845000	None
2	34221781	34222118	338	34222083	6.12243	2.84052	3.83808	Os02g0802700	LOC_Os02g55910	AT5G20410.1	ATMGD2,MGD2	monogalactosyldiacylglycerol synthase 2
4	22855386	22855684	299	22855623	6.12243	2.84052	3.83808	Os04g0457400	None
2	651402	651734	333	651617	5.23808	2.83851	3.02408	Os02g0112000	LOC_Os02g02160
2	33802999	33803290	292	33803161	5.40285	2.8345	3.17671	Os02g0795200	LOC_Os02g55190	AT4G31805.1		WRKY family transcription factor
6	22715201	22715650	450	22715296	5.04861	2.8327	2.85368	Os06g0581500	LOC_Os06g38340	AT3G47570.1		Leucine-rich repeat protein kinase family protein
6	19974008	19974396	389	19974259	4.69534	2.83048	2.53348	Os06g0534200	LOC_Os06g34330
12	26367340	26367927	588	26367461	5.21581	2.82981	3.00385	Os12g0618800	LOC_Os12g42420	AT5G22070.1		Core-2/I-branching beta-1,6-N-acetylglucosaminyltransferase family protein
5	18156386	18156671	286	18156525	5.21581	2.82981	3.00385	Os05g0376200	LOC_Os05g31220	AT2G03670.1	CDC48B	cell division cycle 48B
2	34970058	34970407	350	34970235	5.03604	2.82761	2.84436	Os02g0816200	LOC_Os02g57110	AT5G33370.1		GDSL-like Lipase/Acylhydrolase superfamily protein
8	24351494	24351832	339	24351780	5.02352	2.82253	2.83242	Os08g0493100	LOC_Os08g38480	AT3G07870.1		F-box and associated interaction domains-containing protein
2	3289721	3290006	286	3289858	6.06537	2.82176	3.78489	Os02g0161100	LOC_Os02g06580	AT4G15200.1	AFH3,FH3	formin 3
3	34614890	34615233	344	34615037	6.21991	2.81549	3.92743	Os03g0824100	LOC_Os03g60910	AT1G74850.1	PTAC2	plastid transcriptionally active 2
3	24222730	24223750	1021	24223699	4.82108	2.81027	2.64831	Os03g0634000	LOC_Os03g43430	AT5G28750.1		Bacterial sec-independent translocation protein mttA/Hcf106
5	28966282	28966598	317	28966378	5.31004	2.79962	3.09075	Os05g0582100	LOC_Os05g50510	AT2G34410.1		O-acetyltransferase family protein
6	1744015	1744352	338	1744286	4.78344	2.79444	2.61437	Os06g0132500	LOC_Os06g04169	AT4G24140.1		alpha/beta-Hydrolases superfamily protein
7	19913700	19914010	311	19913868	6.31954	2.79271	4.02084	Os07g0516650	None
3	14182740	14183026	287	14182989	4.75854	2.78399	2.59182	Os03g0363900	LOC_Os03g24900	AT3G04970.1		DHHC-type zinc finger family protein
7	5777932	5778239	308	5778090	4.56778	2.77462	2.42099	Os07g0207100	LOC_Os07g10630	AT2G41820.1		Leucine-rich repeat protein kinase family protein
4	21817551	21817907	357	21817744	5.40741	2.77273	3.17954	Os04g0438600	LOC_Os04g35790	AT3G21260.3	GLTP3	Glycolipid transfer protein (GLTP) family protein
5	8695094	8695383	290	8695232	4.49189	2.74158	2.35218	Os05g0243200	LOC_Os05g15360	AT3G01790.2		Ribosomal protein L13 family protein
5	27256808	27257101	294	27256940	5.60957	2.72689	3.36605	Os05g0549232	None
6	3458004	3458328	325	3458101	5.60957	2.72689	3.36605	Os06g0168700	LOC_Os06g07220	AT3G22142.1		Bifunctional inhibitor/lipid-transfer protein/seed storage 2S albumin superfamily protein
7	1613378	1613766	389	1613504	5.60957	2.72689	3.36605	Os07g0130500	LOC_Os07g03849
7	16206355	16206837	483	16206433	3.94274	2.71338	1.86886	Os07g0461600	LOC_Os07g27760	AT5G13950.3
3	11083779	11084575	797	11083881	5.2176	2.70462	3.00525	Os03g0310600	LOC_Os03g19700	AT3G50170.1		Plant protein of unknown function (DUF247)
7	6881314	6881608	295	6881450	5.2176	2.70462	3.00525	Os07g0224132	LOC_Os07g12255
8	20899715	20900002	288	20899804	4.3721	2.68969	2.2474	Os08g0432000	None
6	6104143	6104908	766	6104888	4.52938	2.68846	2.38592	Os06g0218900	LOC_Os06g11520	AT5G65290.1		LMBR1-like membrane protein
2	3773614	3774007	394	3773986	4.68946	2.68832	2.52787	Os02g0169700	LOC_Os02g07330
3	11685381	11685785	405	11685612	4.68946	2.68832	2.52787	Os03g0322700	LOC_Os03g20650	AT2G41070.2	ATBZIP12,DPBF4,EEL	Basic-leucine zipper (bZIP) transcription factor family protein
11	2373500	2373852	353	2373697	4.51767	2.68361	2.37587	Os11g0151002	LOC_Os11g05340
2	29894558	29894864	307	29894708	4.32472	2.66926	2.20419	Os02g0720600	LOC_Os02g48870	AT5G10770.1		Eukaryotic aspartyl protease family protein
1	4850801	4851154	354	4851069	4.7926	2.66631	2.6211	Os01g0191000	LOC_Os01g09500	AT4G04190.2
12	22240929	22241333	405	22241183	4.7926	2.66631	2.6211	Os12g0549700	None
4	20303506	20303817	312	20303637	4.7926	2.66631	2.6211	Os04g0411200	LOC_Os04g33560	AT3G52770.1	ZPR3	protein binding
8	19609562	19609847	286	19609705	4.7926	2.66631	2.6211	Os08g0409500	LOC_Os08g31660	AT4G39720.1		VQ motif-containing protein
9	6671529	6671976	448	6671705	4.7926	2.66631	2.6211	Os09g0290900	LOC_Os09g11890	AT4G09660.1
6	4761401	4761837	437	4761539	4.11947	2.64799	2.02303	Os06g0194400	LOC_Os06g09420	AT5G42700.1		AP2/B3-like transcriptional factor family protein
7	21164423	21164990	568	21164667	4.89793	2.6467	2.71711	Os07g0538300	LOC_Os07g35380	AT4G23180.1	CRK10,RLK4	cysteine-rich RLK (RECEPTOR-like protein kinase) 10
1	2095990	2096306	317	2096146	3.87807	2.60774	1.81414	Os01g0139600	LOC_Os01g04660	AT3G02600.1	ATLPP3,LPP3	lipid phosphate phosphatase 3
12	19116893	19117217	325	19117119	3.86633	2.60227	1.80335	Os12g0501700	LOC_Os12g31748	AT5G60910.1	AGL8,FUL	AGAMOUS-like 8
3	780459	781017	559	780886	4.31285	2.59927	2.19316	Os03g0113900	LOC_Os03g02280	AT3G15040.1		Protein of unknown function, DUF584
4	31296863	31297144	282	31297007	3.85463	2.59682	1.79537	Os04g0616400	LOC_Os04g52606	AT1G56130.1		Leucine-rich repeat transmembrane protein kinase
10	10102173	10102478	306	10102337	5.33469	2.58584	3.11245	Os10g0341750	None
6	2508158	2508781	624	2508765	3.969	2.58085	1.89016	Os06g0148100	LOC_Os06g05540
6	29695753	29696122	370	29695945	4.37612	2.56455	2.25097	Os06g0703300	LOC_Os06g49000	AT5G45480.1		Protein of unknown function (DUF594)
2	4395392	4395783	392	4395517	5.55933	2.56293	3.32013	Os02g0179250	None
2	6488030	6489004	975	6488203	4.07504	2.56247	1.98245	Os02g0215900	LOC_Os02g12440	AT3G47090.1		Leucine-rich repeat protein kinase family protein
4	22993408	22993694	287	22993538	4.07504	2.56247	1.98245	Os04g0460600	LOC_Os04g38720	AT5G07680.1	ANAC079,ANAC080,ATNAC4,NAC080	NAC domain containing protein 80
6	21050806	21051185	380	21050934	4.07504	2.56247	1.98245	Os06g0553800	LOC_Os06g36010	AT1G79800.1	AtENODL7,ENODL7	early nodulin-like protein 7
6	3326587	3326882	296	3326829	4.18439	2.54683	2.0792	Os06g0166200	LOC_Os06g07020	AT5G52010.1		C2H2-like zinc finger protein
7	28357809	28358206	398	28357888	4.29541	2.53299	2.178	Os07g0670800	LOC_Os07g47430
8	27688345	27688680	336	27688497	3.7062	2.52802	1.66556	Os08g0553450	None
5	21554072	21554382	311	21554327	4.09751	2.51156	2.00236	Os05g0440000	LOC_Os05g36900	AT3G52440.1		Dof-type zinc finger DNA-binding family protein
2	34345819	34346318	500	34345895	3.8032	2.50749	1.75096	Os02g0805000	LOC_Os02g56110	AT1G60070.1		Adaptor protein complex AP-1, gamma subunit
7	2079353	2079663	311	2079572	4.51441	2.50715	2.3728	Os07g0139400	LOC_Os07g04690	AT1G30620.2	HSR8,MUR4,UXE1	NAD(P)-binding Rossmann-fold superfamily protein
4	473673	473973	301	473822	4.86648	2.48241	2.69007	Os04g0107700	LOC_Os04g01710	AT1G29090.1		Cysteine proteinases superfamily protein
5	25466512	25466840	329	25466692	3.72853	2.47466	1.68546	Os05g0513600	LOC_Os05g43800
12	27208353	27208667	315	27208561	3.86121	2.47213	1.79999	Os12g0634700	LOC_Os12g43820	AT2G19000.1
9	16096258	16096985	728	16096775	5.09944	2.468	2.90034	Os09g0436900	LOC_Os09g26580	AT3G43540.1		Protein of unknown function (DUF1350)
11	10983278	10983794	517	10983659	3.7075	2.46544	1.66646	Os11g0297900	LOC_Os11g19220	AT3G24730.1		mRNA splicing factor, thioredoxin-like U5 snRNP
1	34939855	34940305	451	34940042	5.21651	2.46166	3.00448	Os01g0819500	LOC_Os01g60410	AT3G08690.1	ATUBC11,UBC11	ubiquitin-conjugating enzyme 11
3	29146336	29146640	305	29146466	5.56944	2.4453	3.32947	Os03g0719300	LOC_Os03g51000	AT3G17770.1		Dihydroxyacetone kinase
1	18356056	18356420	365	18356147	3.45941	2.41483	1.45952	Os01g0517500	LOC_Os01g33300	AT2G15450.1		Pectin lyase-like superfamily protein
1	37019620	37019969	350	37019731	3.70161	2.40534	1.66137	Os01g0856900	LOC_Os01g63810	AT5G01260.2		Carbohydrate-binding-like fold
8	1043541	1043981	441	1043709	3.81939	2.39967	1.7632	Os08g0118800	LOC_Os08g02530	AT4G34760.1		SAUR-like auxin-responsive protein family
1	30932028	30932326	299	30932150	4.05666	2.39011	1.96885	Os01g0740651	None
2	1699035	1699506	472	1699116	3.26247	2.38378	1.29715	Os02g0132500	LOC_Os02g03960	AT4G34590.1	ATB2,AtbZIP11,BZIP11,GBF6	G-box binding factor 6
12	21229251	21229677	427	21229342	4.29543	2.38234	2.178	Os12g0533800	LOC_Os12g34870	AT4G03115.1		Mitochondrial substrate carrier family protein
1	30507630	30507930	301	30507716	3.2215	2.36431	1.2661	Os01g0731000	LOC_Os01g53079	AT1G53400.1		Ubiquitin domain-containing protein
1	43216106	43216635	530	43216182	3.2215	2.36431	1.2661	Os01g0977600	LOC_Os01g74610	AT5G58410.1		HEAT/U-box domain-containing protein
4	32419362	32419761	400	32419514	3.44588	2.35152	1.44742	Os04g0637400	LOC_Os04g54500	AT1G50840.1	POLGAMMA2	polymerase gamma 2
7	6853372	6853720	349	6853449	3.19115	2.34991	1.23885	Os07g0223766	None
10	11635919	11636203	285	11636013	3.18111	2.34515	1.2322	Os10g0370000	LOC_Os10g22460	AT4G33500.1		Protein phosphatase 2C family protein
5	28207735	28208016	282	28207828	3.27919	2.33308	1.31089	Os05g0566600	LOC_Os05g49160	AT5G64130.1		cAMP-regulated phosphoprotein 19-related protein
11	27333071	27333389	319	27333341	3.14129	2.3263	1.19938	Os11g0676800	LOC_Os11g45160	AT1G58390.1		Disease resistance protein (CC-NBS-LRR class) family
5	16485941	16486271	331	16486031	3.07294	2.29404	1.14678	Os05g0349200	LOC_Os05g28180	AT2G38280.2	ATAMPD,FAC1	AMP deaminase, putative / myoadenylate deaminase, putative
1	23559076	23559431	356	23559172	3.17421	2.28579	1.22596	Os01g0600000	LOC_Os01g41610	AT4G29480.1		Mitochondrial ATP synthase subunit G protein
1	40790049	40790399	351	40790233	3.17421	2.28579	1.22596	Os01g0929200	LOC_Os01g70410	AT3G26700.1		Protein kinase superfamily protein
4	27199057	27199396	340	27199264	4.22722	2.27816	2.11828	Os04g0543200	LOC_Os04g45930	AT2G44710.1		RNA-binding (RRM/RBD/RNP motifs) family protein
4	20144532	20144984	453	20144624	3.11896	2.26101	1.18	Os04g0405900	LOC_Os04g33310	AT2G27830.1
2	23531265	23531582	318	23531343	3.04588	2.22831	1.12508	Os02g0601350	None
